# Supplementary material for: Orelabrutinib, an irreversible inhibitor of Bruton’s tyrosine kinase, for the treatment of systemic lupus erythematosus: a randomised, double-blind, placebo-controlled, phase Ib/IIa study
Source: Research Square preprint supplement (doi:10.21203/rs.3.rs-7058001/v1), 2025-07-23
Supplement: Supplementary file 1 [file 224051e178b9783209970dd0.docx]

**Study Protocol**

Li R, Li X, Zhu X, et al. Orelabrutinib for Systemic Lupus Erythematosus: A Randomized, Double-Blind, Placebo-Controlled Study

This supplementary material was provided by the authors to give readers further details on their article. The material was reviewed but not copyedited.

**A Phase Ib/IIa, Randomized, Double-Blind, Placebo-Controlled, Dose-finding Study to Evaluate the Safety, Tolerability, Pharmacokinetics (PK), Pharmacodynamics (PD) and PK/PD Relationship of ICP-022 in Patients with Mild-Moderate Systemic Lupus Erythematosus**

**Clinical Study Protocol**

| **Protocol No.：** | ICP-CL-00109 |
| --- | --- |
| **Version No.：** | V5.0 |
| **Version Date：** | Jan.7, 2021 |
| **Sponsor:** | Beijing InnoCare Pharma Tech Co. Ltd. |
| **Address：** | Building 8, No. 8 Life Park Road, ZGC Life Science Park, Changping Dist. Beijing, P.R.C |

**Confidentiality Statement**

This document is only provided for review by you as an investigator, ethics committee member, and member of relevant regulatory agencies. The information related to the study drug herein is the exclusive property of the sponsor, InnoCare Pharma, Inc. Without the written consent of the sponsor, please do not inform or disclose any information related to this study drug in any way to any third party not involved with this trial, except for the necessary explanations to the potential subjects who may participate in this clinical trial.

# Sponsor Signature

| **Title** | A Phase Ib/IIa, Randomized, Double-Blind, Placebo-Controlled, Dose-finding Study to Evaluate the Safety, Tolerability, Pharmacokinetics (PK), Pharmacodynamics (PD) and PK/PD Relationship of ICP-022 in Patients with Mild-Moderate Systemic Lupus Erythematosus |
| --- | --- |
| **Study No.** | ICP-CL-00109 |
| **Protocol Version and Date** | v5.0, Jan. 07, 2021 |
| **Study Drug** | Orelabrutinib (ICP-022) |

I will seriously fulfill the responsibility of the sponsor in accordance with the Good Clinical Practices (GCP) and all current applicable regulations, and be responsible for initiating, applying for, organizing, and funding this clinical trial, bear legal responsibility for medical expenses and appropriate economic compensation for subjects who have suffered damage or death related to the trial during the clinical trial, and provide legal guarantees to the investigators. I agree to carry out this clinical trial in accordance with the design and instructions in this protocol.

| Sponsor's Contact: |  | Date |
| --- | --- | --- |
| Wei Zhou, M.D., Medical Director  Beijing InnoCare Pharma Tech. Co. Ltd. |  |  |

# Investigator Signature Page

| **Title** | A Phase Ib/IIa, Randomized, Double-Blind, Placebo-Controlled, Dose-finding Study to Evaluate the Safety, Tolerability, Pharmacokinetics (PK), Pharmacodynamics (PD) and PK/PD Relationship of ICP-022 in Patients with Mild-Moderate Systemic Lupus Erythematosus |
| --- | --- |
| **Study No.** | ICP-CL-00109 |
| **Protocol Version and Date** | v5.0, Jan. 07, 2021 |
| **Study Drug** | Orelabrutinib (ICP-022) |

I have read this study protocol and understand that this clinical trial will be conducted in accordance with the moral, ethical and scientific principles stipulated in the Declaration of Helsinki and the Good Clinical Practice. I know that this trial may be required to be terminated or stop enrollment at any time due to certain pre-specified reasons; I may also stop this trial because of the need to protect the rights and interests of subjects. I agree to carry out this clinical trial in accordance with this protocol and related accompanying documents.

I guarantee that subjects will receive timely and appropriate treatment when adverse events occur during the study. I know the requirements for properly reporting of serious adverse events, and I will record and report these events as required.

I guarantee that the data will be accurately, completely, timely and legally included into the case report form.

I will accept audits and inspections by the sponsor's monitors and the regulatory authorities to ensure the quality of the clinical trial.

| Investigator: |  | Date |
| --- | --- | --- |
| Study Center: |  |  |

# Statement of Compliance

This clinical trial will follow the China’s *Good Clinical Practice* (GCP), the GCP by the International Conference on Harmonization of Technical Requirements for Registration of Pharmaceuticals for Human Use (ICH-GCP), and applicable regulations and guidelines (*Drug Administration Law of the People's Republic of China*, *Administrative Measures for Drug Registration*, *Technical Guidelines for Clinical Pharmacokinetic Study of Chemical Drugs*, etc.). Investigators ensure that they will not violate or change the protocol before obtaining the approval from the sponsor and the ethics committee, except in the case of avoiding direct harm to the subjects.

The study protocol, informed consent form, recruitment materials and related materials will be submitted to the ethics committee for approval before implementation. The approval of the ethics committee must be obtained before enrolling subjects. All amendments must be reviewed and approved by the ethics committee before implementation. All changes to the informed consent form need to be approved by the ethics committee; at the same time, it should be determined whether subjects need to re-sign the informed consent form.

# Synopsis

| **Study Title** | A Phase Ib/IIa, Randomized, Double-Blind, Placebo-Controlled, Dose-finding Study to Evaluate the Safety, Tolerability, Pharmacokinetics (PK), Pharmacodynamics (PD) and PK/PD Relationship of ICP-022 in Patients with Mild-Moderate Systemic Lupus Erythematosus |
| --- | --- |
| **Study No.** | ICP-CL-00109 |
| **Version** | V5.0, Jan 7, 2021 |
| **Sponsor** | Beijing InnoCare Pharma Tech. Co. Ltd. |
| **Phase** | Phase Ib/Ⅱa |
| **Study center(s)** | Multi-center |
| **Indication** | Systemic Lupus Erythematosus (SLE) |
| **Investigational drugs** | Bruton’s Tyrosine Kinase (BTK) inhibitor  **Study Drug:** Orelabrutinib (ICP-022), strength: 10 mg; 50 mg  **Placebo:** Orelabrutinib simulant, identical with the corresponding strengths of orelabrutinib in terms of appearance, packaging, instructions for use, and labels. |
| **Route of Administration** | Oral use |
| **Study Objectives** | **Primary Objective**   - To evaluate the safety and tolerability of orelabrutinib in mild-moderate SLE patients.   **Secondary Objectives**   - To evaluate the pharmacokinetics (PK) of orelabrutinib in mild-moderate SLE patients; - To evaluate the pharmacodynamics (PD) of orelabrutinib in mild-moderate SLE patients; - To evaluate the PK/PD relationship of orelabrutinib in mild-moderate SLE patients; - To evaluate the efficacy of orelabrutinib in mild-moderate SLE patients. |
| **Study Endpoints** | **Primary Endpoints**   - The occurrences of Treatment Emergent Serious Adverse Events (TESAEs) and Treatment Related Serious Adverse Events (TRSAEs); - The occurrences of Treatment Emergent Adverse Events (TEAEs) and Treatment Related Adverse Events (TRAEs), as evaluated by severity; - Vital signs, electrocardiogram (ECG), and laboratory findings.   **Secondary Endpoints**   - **Target Occupancy Rate:** - BTK occupancy rate (Days -1, 1, and 14). - **Pharmacodynamics:** The followings biomarkers are selected to evaluate the pharmacodynamics of orelabrutinib. - Serum immunoglobulin (Ig) levels (IgA, IgG, IgM) at Days 28 and 84; - Changes from baseline in Ig levels (IgA, IgG, IgM) and C3 and C4 levels at Days 28 and 84; - Changes from baseline in serum anti-dsDNA antibody and antinuclear antibody (ANA) at Days 28 and 84; - Changes from baseline in cytokine levels [Interferon-α (IFN-α) and Interleukin 6 (IL-6)] at Days 28 and 84; - Changes from baseline in total B cell counts at Days 28 and 84; - Changes from baseline in effector B cell counts (Beffs) at Day 28s and 84; - Changes from baseline in regulatory B cell counts (Bregs) at Days 28 and 84; - Changes from baseline in the ratio of Bregs to Beffs (Bregs/Beffs) at Days 28 and 84; - Changes from baseline in erythrocyte sedimentation rate at Days 28 and 84. - **Pharmacokinetics** - To evaluate the pharmacokinetic characteristics through the plasma concentration-time curve and pharmacokinetic parameters after administration of orelabrutinib, including: maximum concentration (Cmax); time to maximum concentration (Tmax); half-life (T1/2); area under the drug concentration-time curve (AUC); apparent clearance (CL/F); terminal apparent volume of distribution (Vz/F); accumulation factor (R), etc. - **Efficacy** - The responser ratio, as measured by SLE Responder Index-4 (SRI-4) at Days 28 and 84; - The responser ratio, as measured by SRI-6, between Days 28 and 84; - The rates of the SLE disease activity index-2000 (SLEDAI-2K) score at Days 28 and 84 decreased by 4 points from the baseline; - Change in the proportion of subjects at Day 84 whose arthritis and/or rash have resolved relative to baseline (as measured by SLEDAI-2K); - The change from baseline in counts of painful joints, tender joints, and swollen joints (66/68 joint counts) at Days 28 and 84, in subjects with arthritis at baseline. - The proportion of subjects with proteinuria ≤0.5 g/24 h or a decrease of ≥25% from baseline at Day 84, in subjects with baseline proteinuria >0.5 g/24 h. |
| **Study Design** | This study is designed as a randomized, double-blind, placebo-controlled trial. It includes a screening period (no more than 28 days after the subject signs the informed consent to the first dose), a treatment period (12 consecutive weeks after the first dose), and a follow-up period (28 days after the last dose).  The subjects to be included in this study should be patients undergoing standard treatment. These patients will be randomized into the placebo group (n=15) and the orelabrutinib group (n=45), of which the orelabrutinib group will be divided into three cohorts: 50 mg (n=15), 80 mg (n=15) and 100 mg (n=15). The investigational drugs will be taken orally once a day for 12 weeks. |
| **Sample Size** | It is planned to recruit 60 subjects in this study. |
| **Inclusion Criteria** | **Subjects eligible for the study must meet all of the following criteria:**   1. Able to provide written informed consent. 2. Male or female subjects aged 18-75 years. 3. Diagnosis of SLE at >6 months before signing the informed consent, meeting at least 4 out of 11 criteria of American College of Rheumatology (ACR) classification criteria for SLE. 4. The total score of SLEDAI-2K at screening is 5-12 (including cut-off value). 5. Currently under standard treatment for SLE and has been treated for at least 3 months. The standard treatment for SLE can be corticosteroids, and/or antimalarials (such as chloroquine or hydroxychloroquine), and/or immunosuppressants (such as azathioprine, methotrexate, mycophenolate mofetil, or sodium mycophenolate, cyclosporine, leflunomide, tacrolimus, sirolimus, mizoribine, 6-mercaptopurine, iguratimod or thalidomide). 6. Anti-dsDNA antibody positive and/or ANA positive and/or anti-Smith antibody positive, all based on the normal reference ranges provided by the local hospital. |
| **Exclusions Criteria** | **Subjects who meet any of the following criteria will be excluded from this study:**   1. Not able to abide by the protocol requirements. 2. Females who are pregnant or breastfeeding or intend to become pregnant during the study or male partners.  - Pregnancy test is not required for women of non-childbearing potential who have been postmenopausal (at least 12 months of non-therapy-induced amenorrhea) or surgically sterilized (absence of ovaries and/or uterus).  1. Prior exposure to a BTK inhibitor. 2. Suffering from Neuropsychiatric Systemic Lupus Erythematosus (NPSLE), manifested as mental confusion, organic encephalopathy syndrome, cranial nerve disease, lupus headache, or new cerebrovascular accident, etc.). 3. Severe or rapidly progressive type III or IV glomerulitis, simple type V or VI lupus nephritis, or active nephritis that requires the use of drugs prohibited by the protocol, or active nephritis that requires hemodialysis treatment. 4. Suffering from other autoimmune diseases except SLE (excluding secondary Sjogren’s syndrome). 5. Subjects who intend to start or change anti-SLE treatment after the screening visit. 6. Prior corticosteroids given in excess of prednisone 25 mg/day or its equivalent or previously changed the corticosteroid dose, within the 28 days before randomization. 7. Have started any angiotensin-converting enzyme inhibitor or angiotensin receptor blocker, or nonsteroidal anti-inflammatory drug (NSAID) or changed their doses, within 1 week before screening or during screening. 8. Have started the following antimalarials or immunosuppressants within 3 months before randomization, or changed their doses within 28 days before randomization:  - Antimalarial drugs, including chloroquine or hydroxychloroquine; - Immunosuppressants, including methotrexate, azathioprine, mycophenolate mofetil or sodium mycophenolate, cyclosporine, tacrolimus, sirolimus, leflunomide, mizoribine, 6-mercaptopurine, iguratimod or thalidomide.  1. Have used rituximab, epratuzumab, or any other B-cell depletion treatment within 12 months before randomization. 2. Have used cyclophosphamide and chlorambucil within 6 months before randomization. 3. Have received belimumab, tumor necrosis factor (TNF) blockers, interleukin receptor blockers or other biological agents, intravenous immunoglobulin, or plasma exchange therapy, within 3 months before randomization (or 5 half-lives, whichever is longer). 4. Have participated in any other clinical trial or have used any investigational drug or other immunosuppressants/modulators (unless approved by the medical monitor) within 28 days before the screening period (or 5 half-lives, whichever is longer). 5. Have received cyclosporine A topical cream/ointment preparations (except ophthalmic drugs), strong topical glucocorticoids (as per World Health Organization coding dictionary) or other local immunomodulators (such as tacrolimus, pimecrolimus) withing 28 days before randomization. 6. Vaccination with live or live-attenuated virus vaccine within 1 month before screening or during screening.  - Patients who have been vaccinated against Streptococcus pneumoniae vaccine (23-valent pneumococcal polysaccharide vaccine or 13-valent pneumococcal conjugate vaccine) as per local guidelines are allowed; - For subjects who have received one or more influenza vaccines during screening, an interval of at least 2 weeks from the date of vaccination to the first administration of the investigational drug is required.  1. Active and uncontrolled infection (clinically significant viral, bacterial or fungal infection, etc.), or any severe infection that requires hospitalization in the past 6 months; or have received anti-infective treatment recently (within 14 days before the first dose). 2. Herpes zoster infection within 12 weeks prior to screening, or a history of disseminated/complex herpes zoster (eg: multiple skin involvement, ocular herpes zoster, central nervous system involvement, or postherpetic neuralgia). 3. Positive tuberculosis screening during the screening period (as per the interferon-γ release assay for the diagnosis of tuberculosis, including T-SPOT®, etc.), or patients with active or latent tuberculosis, or tuberculosis patients who have not completed the appropriate standard treatment. 4. The interval between the last dose of the CYP3A4 inhibitor and the first dose of investigational drug is less than 5 half-lives of CYP3A4 inhibitor. 5. Known human immunodeficiency virus (Human Immunodeficiency Virus, HIV) infection, as evidenced by positive serological test. 6. Current or history of Central Nervous System (CNS) diseases, such as epilepsy, CNS vasculitis or neurodegenerative diseases, patients with a history of stroke who have had a stroke or transient ischemic attack within 2 years before screening, or have residual neurological defects as judged by the investigator. 7. Major and uncontrolled concomitant diseases (including poorly controlled diabetes and related medical history) that may affect compliance with the protocol or the interpretation of study results. 8. Major surgery or major traumatic injury (excluding biopsy) within 28 days before the first administration, or major surgery is expected during the study treatment period. 9. Clinically documented cardiovascular diseases that are obviously unstable or not effectively treated, such as heart disease class III or IV according to the New York Heart Association (NYHA) classification (see Appendix 3 for details), or have had myocardial infarction, malignant arrhythmia, unstable angina pectoris in the past 6 months, or hypertension that cannot be controlled by medication. 10. Significant active lung disease (such as interstitial lung disease and/or obstructive lung disease, etc.). 11. Any other disease, metabolic dysfunction, physical examination findings, or clinical laboratory findings that may be contraindicated to use the study drug. 12. HBV [Hepatitis B Surface Antigen (HBsAg)] or HCV antibody positive, or the HBV DNA positive by Polymerase Chain Reaction (PCR) test for patients with Hepatitis B Core Antibody (HbcAb) positive. 13. Abnormal tissue or organ functions, as evidenced by the following laboratory tests before randomization:  - Absolute neutrophil count (ANC) < 1.5 x 109/L; platelet < 75 x 109/L; hemoglobin<90 g/L; lymphocyte count<0.8 x 109/L; - Total bilirubin>1.5 x Upper Limit of Normal (ULN) (for subjects with history of Gilbert syndrome, >3 x ULN); aspartate aminotransferase (AST) or alanine aminotransferase (ALT)>2 x ULN; - Estimated glomerular filtration rate < 40 ml/min/1.73m2 from the Modification of Diet in Renal Disease (MDRD) formula; - Protein urine in 24 hours ≥3.5 g. |
| **Safety Evaluation Index** | Safety evaluation will include adverse events, vital signs, physical examination, laboratory test, electrocardiogram examination, echocardiography, etc. |
| **Pharmacokinetics Study** | **Blood sampling time points**  All participating subjects are required to provide PK blood samples, about 3 ml at each blood sampling time point. The blood sample will be tested in a designated laboratory. Subjects will stay fasting from 10 hours pre-dose to 4 hours post-dose at Days 1 and 14, and can be given a piece of Snickers or chocolate 2 hours post-dose. However, only PK samples from orelabrutinib-treated subjects will be measured. Please refer to the "PK Sample Collection Manual” for the specific requirements for blood sample collection, processing and storage. The blood sampling time points are tentatively set as follows:   - Days 1 and 14: 60 min pre-dose; 30 min, 1 h, 2 h, 4 h, 8 h, 12 h, 24 h (that is, prior to the D2 and D15 administration) post-dose.   **Pharmacokinetics Parameters**  Maximum concentration (Cmax); time to maximum concentration (Tmax); half-life (T1/2); area under the drug concentration-time curve (AUC); apparent clearance (CL/F); terminal apparent volume of distribution (Vz/F); accumulation factor (R), etc. |
| **Pharmacodynamics Study** | **Blood sampling time points**  Approximately 15-18 ml will be collected at each blood sampling time point. The blood sample will be tested in a designated laboratory. Please refer to the "PD Sample Collection Manual” for the specific requirements for blood sample collection and processing. The blood sampling time points are as follows: Days 1 (or within 7 days before the first dose), 28 and 84: pre-dose  **Pharmacodynamic Test Items**  Blood samples: total B cell count, Beffs count, Bregs count, erythrocyte sedimentation rate;  Serum samples (processed from blood samples): serum Ig levels, complement C3, complement C4, anti-dsDNA antibody, ANA, cytokines (IFN-α and IL-6).  If a study center is incapable to carry out a certain PD item and cannot send samples to the unit with such capabilities in time, subjects enrolled in this study center may not participate in this PD test. |
| **Target Occupancy** | **Blood sampling time points**  Approximately 10 ml samples will be collected at each blood sampling time point, but only PK samples from orelabrutinib-treated subjects will be measured. The blood sample will be tested in a designated laboratory. Please refer to the "BTK Sample Collection Manual” for the specific requirements for blood sample collection and processing. The blood sampling time points are as follows:   - Within 60 min pre-dose (or within 5 days before the first administration) and 4 hours (±10 min) post-dose at Day 1; - Day 14: Within 60 minutes pre-dose and 4 hours (±10 min) post-dose.   **Detection of Target Occupancy:**  Peripheral Blood Mononuclear Cell (PBMC) will be isolated from blood samples to detect the target occupancy rate of orelabrutinib on BTK in PBMC as a biomarker of efficacy.  If a study center is incapable to carry out this test and cannot send samples to the unit with such capabilities in time, subjects enrolled in this study center may not participate in this target occupancy study. |
| **Statistical Analysis** | **Primary Analyses**  The primary objective of this study is to evaluate the safety and tolerability of orelabrutinib in mild-moderate SLE patients. The primary endpoint of this study is the adverse events that will occur after oral administration of orelabrutinib, as well as vital signs, electrocardiogram and laboratory tests.  No sample size calculation and formal hypothesis testing will be applied in this study. It is planned to randomize 60 subjects into the placebo group (n=15) and three dose groups of orelabrutinib (50 mg (n=15), 80 mg (n=15) and 100 mg (n=15)), once daily. All subjects will be monitored during the treatment period (for a period of 12 weeks), and the 28-day follow-up visit will be completed after the treatment period. All subjects will be randomized into the groups in parallel.  Safety Analysis  Safety will be assessed through summaries of adverse events, changes in laboratory results, changes in ECG, and changes in vital signs. All collected adverse event data will be listed by assigned dose level and subject No. All treatment-emergent adverse events will be summarized in coded terms, based on severity (see section 8.2.4.1 for details) and relationship with the study drug. In addition, all TESAE, TRSAE and TRAE will be listed and summarized separately. The adverse events leading to drug discontinuation will also be separately listed and summarized.  The relationship between exposure and TRSAEs will be analyzed, as long as the data allows.  Pharmacokinetics Analyses  Only PK samples from orelabrutinib-treated subjects will be measured. Only subjects who have sufficient samples to fully calculate the PK parameters will be included in the data analysis. The plasma concentration of orelabrutinib will be tabulated and summarized, and individual and average plasma concentration-time curves (C-T curves) will be plotted. The standard non-compartment model analysis will be used to calculate the pharmacokinetic parameters after single-dose and multiple-dose administration. A list summary and descriptive statistical analysis of the generated PK parameters will be performed, and the arithmetic mean, standard deviation, coefficient of variation, median, maximum, minimum, geometric mean and coefficient of variation of geometric mean of each parameter will be calculated. Inter-subject variability and drug accumulation will be assessed. Additional PK analyses will be conducted as appropriate.  Pharmacodynamics Analysis  Only subjects who have received at least 1 week of treatment and have baseline values and sufficient samples will be included in the data analysis so as to calculate the corresponding endpoints. All data will be tabulated and descriptively summarized and plotted by dose group and scheduled visit. For Ig levels, the measured Ig values at each scheduled visit and their changes from baseline will be summarized by dose group, including absolute change values and relative change percentages. All other biomarkers will be displayed and summarized in the same way as above.  Efficacy Analysis  In this study, the analysis results of all efficacy data will be tabulated, and the distribution of each efficacy measures will be descriptively summarized or plotted by dose group and scheduled visit. |

# Study Schedule

| **Periods** | | **Screening Period** | **Treatment Period** | | | | | | **End-of-Treatment Visit** | **Follow-up Period** |
| --- | --- | --- | --- | --- | --- | --- | --- | --- | --- | --- |
| **Week 1** | | **Week 2** | **Week 4** | **Week 8** | **Week 12** |
| **Visit Day** | | **Day -28 to -1** | **D1** | **D2** | **D 14** | **D28** | **D56** | **D84** | **last dose** | **28 days after last dose** |
| **Window** | | **\** | **\** | **\** | **± 1 day** | **± 3 days** | **± 3 days** | **± 3 days** | **Within 3 days** | **± 5 days** |
| **Study Procedure Management** | | | | | | | | | | |
| **Informed Consent1** | | X |  |  |  |  |  |  |  |  |
| **Inclusion/Exclusion Criteria** | | X |  |  |  |  |  |  |  |  |
| **Demography2** | | X |  |  | X | X | X | X |  |  |
| **Medical history and treatment history** | | X |  |  |  |  |  |  |  |  |
| **Concomitant medication records** | | X | | | | | | | | |
| **Study Drug Treatment** | | | | | | | | | | |
| **Randomization** | |  | X |  |  |  |  |  |  |  |
| **Orelabrutinib administration** | |  | Once per day | | | | | |  | |
| **Drug dispensation** | |  | X |  | X | X | X |  |  |  |
| **Drug return** | |  |  |  | X | X | X | X |  |  |
| **Medication compliance3** | |  |  |  | X | X | X | X |  |  |
| **Laboratory Tests** | | | | | | | | | | |
| **Physical examination & vital signs** | | X | X |  | X | X | X | X | X | X |
| **Haematology4** | | X | X |  | X | X | X | X | X | X |
| **Urinalysis5** | | X | X |  | X | X | X | X | X | X |
| **Blood chemistry6** | | X | X |  | X | X | X | X | X | X |
| **Electrolyte7** | | X | X |  | X | X | X | X | X | X |
| **Amylase & Lipase8** | | X | X |  | X | X | X | X | X | X |
| **Coagulation9** | | X | X |  |  | X | X | X | X | X |
| **5 items of thyroid function** | | X |  |  |  | X |  | X | X | X |
| **Ultrasound thyroid10** | | X |  |  |  | X10 |  | X10 |  |  |
| **Chest X-ray11** | | X | as clinically indicated | | | | | |  |  |
| **anti-Smith antibody** | | X |  |  |  |  |  |  |  |  |
| **Pregnancy test (only for female subjects of childbearing potential)12** | | X | X |  |  | X | X | X | X | X |
| **TB screening (Interferon-γ release assay)** | | X |  |  |  |  |  |  |  |  |
| **serology HIV, HBV, HCV tests13** | | X |  |  |  |  |  |  |  |  |
| **HBV DNA test13** | | as clinically indicated | | | | | | |  |  |
| **12-lead ECG14** | | X | X | X | X | X | X | X | X | X |
| **Echocardiography15** | | X | as clinically indicated | | | | | | X15 | as clinically indicated |
| **Adverse event recording16** | | X | | | | | | | | |
| **PK, PD and other evaluations** | | | | | | | | | | |
| **Pharmacokinetics Study17** | |  | X | X | X |  |  |  |  |  |
| **Pharmacodynamics study18** | **anti-dsDNA antibody, ANA** | X | X |  |  | X |  | X |  |  |
| **Ig, C3, C4** | X | X |  |  | X |  | X |  |  |
| **IFN-α** |  | X |  |  | X |  | X |  |  |
| **IL-6** |  | X |  |  | X |  | X |  |  |
| **total B cell, Beffs , Bregs counts** |  | X |  |  | X |  | X |  |  |
| **Sedimentation rate** |  | X |  |  | X |  | X |  |  |
| **Target Occupancy19** | | X | X |  | X |  |  |  |  |  |
| **Protein urine 24 hour quantification20** | | X | as clinically indicated | | | | | X | X |  |
| **SRI 21** | |  |  |  |  | X |  | X | X |  |
| **SLEDAI-2K** | | X |  |  |  | X |  | X | X |  |
| **BILAG-2004** | | X |  |  |  | X |  | X | X |  |
| **PGA** | | X |  |  |  | X |  | X | X |  |
| **Joint evaluation** | | X |  |  |  | X |  | X | X |  |

**Notes:**

◆ **End-of-Treatment visit:** Regardless of the reason for early withdrawal from the study, the investigator will arrange for the subject to return to the study center within 3 days after the last dose for the evaluation of the End-of-Treatment visit. For subjects who have completed the 12-week treatment according to the study protocol and have completed the evaluation of the Day 84 visit, the End-of-Treatment visit is not necessary.

1. The informed consent must be obtained before the subject enters the screening period.
2. Demographic statistics include date of birth, gender, height, and weight. The body weight will only be measured on Days 14, 28, 56, and 84.
3. Medication compliance = The number of tablets taken since the last drug dispensation/The number of tablets that should be taken since the last drug dispensation. The medication compliance should be ≥ 80% and ≤120%. If a subjects’ medication compliance does not meet the above requirements, the investigator must communicate with the subject in a timely manner to improve the subject’ awareness of medication.
4. Hematology should include complete blood count, i.e. white blood cells (WBC) including lymphocytes, neutrophils, red blood cells (RBC), hemoglobin, haematocrit and platelets. The haematology results within 5 days before the first dose can be accepted at D1. If more than 5 days, the test should be repeated at D1. Blood samples during the treatment period should be collected before administration.
5. Urinalysis includes protein, glucose, red blood cells urine (qualitative or quantitative results, including occult blood or blood urine). The urinalysis results within 5 days before the first dose can be accepted at D1. If more than 5 days, the test should be repeated at D1. Urine samples during the treatment period should be collected before administration.
6. Blood chemistry includes: AST, ALT, Glutamyl transpeptidase (GGT), Albumin (ALB), Total bilirubin (TBIL), Direct bilirubin (DBIL), Blood Urea Nitrogen (BUN) or urea, Creatinine (Cr), Triglyceride (TG), Total Cholesterol (TC), Glucose (Glu), Lactate dehydrogenase (LDH). The blood chemistry results within 5 days before the first dose can be accepted at D1. If more than 5 days, the test should be repeated at D1. Blood samples during the treatment period should be collected before administration.
7. Electrolytes include: potassium (K), sodium (Na), chlorine (Cl), calcium (Ca), magnesium (Mg), phosphorus (P). The electrolyte results within 5 days before the first dose can be accepted at D1. If more than 5 days, the test should be repeated at D1. Blood samples during the treatment period should be collected before administration.
8. Amylase: serum amylase (AMY); lipase: serum lipase (LPS). The amylase & lipase results within 5 days before the first dose can be accepted at D1. If more than 5 days, the test should be repeated at D1. Blood samples during the treatment period should be collected before administration.
9. The coagulation includes: International Normalized Ratio (INR), Prothrombin Time (PT), and Activated Partial Thromboplastin Time (APTT). The coagulation results within 5 days before the first dose can be accepted at D1. If more than 5 days, the test should be repeated at D1. Blood samples during the treatment period should be collected before administration.
10. Thyroid ultrasound examination will be performed at the following time points: screening period, Day 28 (results within ±5 days can be accepted), and Day 84 (results within ±5 days can be accepted).
11. Chest X-ray examination will be performed during the screening period. If the subject has undergone chest CT examination due to COVID-19 or other reasons and can provide the results, the chest X-ray examination during the screening period can be exempted.
12. Blood pregnancy test (only for female subjects of childbearing potential) is mandatory during the screening period. During the treatment period and until 28 days after the last dose, a urine pregnancy test will be performed every 4 weeks. If the urine pregnancy test is positive, a serum pregnancy test must be performed for confirmation. Urine or blood samples during the treatment period should be collected before administration.
13. HIV, HBV, and HCV testing are mandatory during the screening period. Relevant test items may be repeated during the treatment period and follow-up period when clinically indicated. If HBcAb is positive during the screening period, HBV DNA testing will be repeated every 4 weeks thereafter (week 4, week 8 and week 12). If the DNA titer exceeds the upper limit of normal, it is recommended to give antiviral treatment or treat it as per the investigator's discretion. Subjects can continue to receive treatment until they meet the criteria for termination or discontinuation of treatment prescribed by the study protocol.
14. The 12-lead ECG will be performed at the following time points: pre-dose and post-dose at Day 1; before leaving the study center at Day 2; post-dose at Days 14, 28, 56 and 84; End-of-Treatment visit and follow-up period. The ECG after administration during the treatment period should be performed within 2 to 4 hours post-dose, and the subject should rest in a semi-supine position for at least 5 minutes before the ECG examination.
15. Echocardiography will be performed at: screening period, treatment period (when clinically indicated), End-of-Treatment visit (results within 5 days after the visit can be accepted), follow-up period (when clinically indicated).
16. For the collection and follow-up time-frame of adverse events, see section [8.2.5](#_8.2.5_Collection_&).
17. The PK blood samples will be collected at Days 1 and 14: 60 min pre-dose; 30 min, 1 h, 2 h, 4 h, 8 h, 12 h, 24 h (that is, before D2 and D15 administration) post-dose.
18. The PD blood samples will be collected at Days 1 (or within 7 days before the first dose), 28 and 84: pre-dose. The PD study involves multiple testing items. If anti-dsDNA antibody, ANA, Ig, C3, C4, and erythrocyte sedimentation rate tests are completed within 7 days before the first dose, tests need not be repeated at Day 1; If a study center is incapable to carry out a certain PD item and cannot send samples to the unit with such capabilities in time, subjects enrolled in this study center may not participate in this PD test.
19. The target occupancy blood samples will be collected at the following time points: within 60 min pre-dose (or within 5 days before the first administration) and 4 hours (±10 min) post-dose at Day 1; and within 60 min pre-dose and 4 hours (±10 min) post-dose at Day 14. If a study center is incapable to carry out this test and cannot send samples to the unit with such capabilities in time, subjects enrolled in this study center may not participate in this target occupancy study.
20. 24-hour urine protein quantitative determination is mandatory during the screening period; for subjects with urine protein ≥1+, 24-hour urine protein quantitative determination will be performed when clinically indicated.
21. SRI assessment includes the assessment of disease activity according to three assessment systems: SLEDAI-2K, British Isles Lupus Assessment Group 2004 (BILAG 2004) and Physician Global Assessment (PGA) (see section [8.6.1](#_8.6.1_SRI_Evaluation)), at screening, Day 28, Day 84, and End-of-Treatment visit.

# Table of Contents

[Sponsor Signature 1](#_Toc71149126)

[Investigator Signature Page 2](#_Toc71149127)

[Statement of Compliance 3](#_Toc71149128)

[Synopsis 4](#_Toc71149129)

[Study Schedule 12](#_Toc71149130)

[Table of Contents 18](#_Toc71149131)

[1 Introduction 21](#_Toc71149132)

[1.1 Study Rationale 21](#_Toc71149133)

[1.2 Study Background 22](#_Toc71149134)

[1.2.1 Nonclinical Study 22](#_Toc71149135)

[1.2.2 Clinical Studies 25](#_Toc71149136)

[1.3 Risk-Benefit Assessment 28](#_Toc71149137)

[2 Study Objectives and Endpoints 30](#_Toc71149138)

[2.1 Study Objectives 30](#_Toc71149139)

[2.1.1 Primary Objectives 30](#_Toc71149140)

[2.1.2 Secondary Objectives 30](#_Toc71149141)

[2.2 Study Endpoints 30](#_Toc71149142)

[2.2.1 Primary Endpoints 30](#_Toc71149143)

[2.2.2 Secondary Endpoints 30](#_Toc71149144)

[3 Study Design 32](#_Toc71149145)

[3.1 Overall Design of the Study 32](#_Toc71149146)

[3.2 Dose-selection Rationale 32](#_Toc71149147)

[3.3 Definition of End of Study 32](#_Toc71149148)

[4 Study Population 34](#_Toc71149149)

[4.1 Inclusion Criteria 34](#_Toc71149150)

[4.2 Exclusion Criteria 34](#_Toc71149151)

[4.3 Lifestyle Considerations 37](#_Toc71149152)

[4.3.1 Contraception 37](#_Toc71149153)

[4.3.2 Visit Requirements 38](#_Toc71149154)

[4.4 Screening Failure 38](#_Toc71149155)

[5 Investigational Drugs 39](#_Toc71149156)

[5.1 Investigational Drugs and Administration 39](#_Toc71149157)

[5.1.1 Basic Information for the Investigational Drugs 39](#_Toc71149158)

[5.1.2 Dosage and Administration 39](#_Toc71149159)

[5.1.3 Dose Modification 39](#_Toc71149160)

[5.2 Preparation/Processing/Storage/Responsibility 40](#_Toc71149161)

[5.2.1 Receipt and Inventory of the Investigational Drug 40](#_Toc71149162)

[5.2.2 Packaging and Labeling of Drugs 40](#_Toc71149163)

[5.2.3 Storage and Stability 40](#_Toc71149164)

[5.3 Methods to Minimize Bias: Randomization and Blinding 41](#_Toc71149165)

[5.3.1 Randomization 41](#_Toc71149166)

[5.3.2 Blinding 41](#_Toc71149167)

[5.4 Subject Compliance 41](#_Toc71149168)

[5.5 Concomitant Medication 42](#_Toc71149169)

[5.5.1 Prohibited Drugs 42](#_Toc71149170)

[5.5.2 Permitted Drugs 42](#_Toc71149171)

[6 Study Procedures 44](#_Toc71149172)

[6.1 Screening Visit (Days -28 to -1) 44](#_Toc71149173)

[6.2 Visits During the Study 45](#_Toc71149174)

[6.2.1 Visits During the Treatment Period (Day 1-84) 45](#_Toc71149175)

[6.2.2 End-of-Treatment Visit (within 3 days after last dose) 47](#_Toc71149176)

[6.2.3 Follow-up (28 days after last dose) 48](#_Toc71149177)

[6.3 Unscheduled visits 48](#_Toc71149178)

[7 Early Termination and Withdrawal 49](#_Toc71149179)

[7.1 Early Termination 49](#_Toc71149180)

[7.2 Withdrawal Criteria 49](#_Toc71149181)

[7.3 Lost to Follow-up 50](#_Toc71149182)

[8 Study Evaluation 51](#_Toc71149183)

[8.1 Safety Evaluation 51](#_Toc71149184)

[8.2 Adverse Events and Serious Adverse Events 51](#_Toc71149185)

[8.2.1 Definition of Adverse Event 51](#_Toc71149186)

[8.2.2 Definition of Serious Adverse Event 52](#_Toc71149187)

[8.2.3 Definition of Suspected Unexpected Serious Adverse Reaction 53](#_Toc71149188)

[8.2.4 Classification of Adverse Events 53](#_Toc71149189)

[8.2.5 Collection & Follow-up of Adverse Events 55](#_Toc71149190)

[8.2.6 Assessment of Adverse Events 55](#_Toc71149191)

[8.2.7 Reporting and Follow-up of Abnormal Laboratory Tests 56](#_Toc71149192)

[8.2.8 Reporting of Serious Adverse Events 56](#_Toc71149193)

[8.2.9 Pregnancy Reporting 56](#_Toc71149194)

[8.3 Pharmacokinetic Evaluation 57](#_Toc71149195)

[8.4 Pharmacodynamic Evaluation 58](#_Toc71149196)

[8.5 Target Occupancy Evaluation 58](#_Toc71149197)

[8.6 Efficacy Evaluation 59](#_Toc71149198)

[8.6.1 SRI Evaluation 59](#_Toc71149199)

[8.6.2 SLEDAI-2K Evaluation 59](#_Toc71149200)

[8.6.3 BILAG2004 Evaluation 59](#_Toc71149201)

[8.6.4 PGA Evaluation 59](#_Toc71149202)

[9 Statistical Considerations 60](#_Toc71149203)

[9.1 Statistical Assumption 60](#_Toc71149204)

[9.2 Sample Size Estimation 60](#_Toc71149205)

[9.3 Analysis Populations 60](#_Toc71149206)

[9.4 Statistical Analysis 60](#_Toc71149207)

[9.4.1 Safety Analysis 60](#_Toc71149208)

[9.4.2 Pharmacokinetic Analyses 61](#_Toc71149209)

[9.4.3 Pharmacodynamics Analysis 61](#_Toc71149210)

[9.4.4 Efficacy Analyses 61](#_Toc71149211)

[10 Supporting Documents and Operational Considerations 62](#_Toc71149212)

[10.1 Regulations, Ethics, and Study Supervision 62](#_Toc71149213)

[10.1.1 Informed Consenting Process 62](#_Toc71149214)

[10.1.2 Confidentiality and Privacy 62](#_Toc71149215)

[10.1.3 Key Role and Study Management 63](#_Toc71149216)

[10.1.4 Safety Supervision 63](#_Toc71149217)

[10.1.5 Clinical Trial Monitoring 63](#_Toc71149218)

[10.1.6 Quality Assurance and Quality Control 64](#_Toc71149219)

[10.1.7 Data Handling and Record Retention 64](#_Toc71149220)

[10.1.8 Protocol Deviations 65](#_Toc71149221)

[10.1.9 Study Publication and Data Sharing Policy 66](#_Toc71149222)

[10.2 List of Abbreviations 66](#_Toc71149223)

[10.3 Amendment History 68](#_Toc71149224)

[11 Literature References 73](#_Toc71149225)

# 1 Introduction

## 1.1 Study Rationale

SLE is a potentially fatal autoimmune disease, which can affect multiple organs and multiple systems. It mostly occurs in adolescent and menopausal women. The incidence ratio of adult male to female is 1:9. Organ damage caused by SLE can accumulate over time, and the mortality rate will increase with the accumulation of affected organs. SLE is known to be associated with the formation of autoantibodies by B cell hyperactivity ([Chan and Shlomchik, 1998;](#文献Chan) [Shlomchik et al., 1994](#文献Shlomchik)). The destruction of the self-tolerance of T and B lymphocytes leads to the chronic activation of innate and adaptive immune cells, followed by the production of autoantibodies. In addition, immune complexes bind to macrophages to further drive production of inflammatory cytokines, in turn promotes local and systemic inflammation ([Choi et al., 2012](#文献Choi)).

Current treatments for SLE include corticosteroids, antimalarials, nonsteroidal anti-inflammatory drugs (NSAIDs), and cytotoxic immunosuppressants. The efficacy of these treatments varies depending on organ system involved and is limited by associated toxicities. Hydroxychloroquine is the most common immunomodulatory therapy used for the treatment of mild SLE. Corticosteroids (prednisone) are used for treatment of both mild SLE disease manifestations (low dose) as well as severe organ involvement (high dose). However, not all patients adequately respond to corticosteroids or can tolerate the dose-dependent toxicity associated with this drug class ([Holroyd and Edwards, 2009](#文献Holroyd)).

BTK is a member of TEC family and expresses in B lymphocyte, mast cell, macrophage, monocyte and neutrophil. BTK plays key roles in B-cell receptor (BCR) signaling cascades and B cell development and activation ([Maas and Hendriks, 2001](#文献Maas); [Satterthwaite and Witte, 2000](#文献Satterthwaite)). BTK is also involved in the migration and adhesion of B lymphocytes. After BCR is stimulated by its ligand, BTK is recruited to the cell membrane and activated by autophosphorylation. Then, activated BTK phosphorylates phospholipase C-γ2 (PLC), triggering downstream signaling pathway, leading to B cell proliferation, survival, differentiation and cytokine expression. Overexpression of BTK leads to abnormal B cell activation and autoimmune disorders (Kil et al., 2012). BTK has become a new target for the treatment of SLE. Although ibrutinib, the first-in-class BTK inhibitor, has shown impressive clinical activity in the treatment of mantle cell lymphoma and chronic lymphocytic leukemia, its therapeutic potential for autoimmune diseases is limited because it also inhibit the epidermal growth factor receptor (EGFR) BTK ([Advani et al., 2013;](#文献Advani) [McMullen et al., 2014;](#文献McMullen) [Smith, 2015;](#文献Smith) [Tucker and Rule, 2015;](#文献Tucker) [Wang et al., 2013](#文献Wang)).

Orelabrutinib is a novel selective BTK inhibitor with a half maximal BTK inhibitory concentration (IC50) value of 1.6 nM in an *in vitro* enzyme profiling test. The kinase selectivity of orelabrutinib is superior to other BTK inhibitors, and its lack of inhibitory effect on EGFR leads to avoidance of common side effects in anti-EGFR therapy, such as diarrhea and rash ([Gao et al., 2014;](#文献Gao) [Harandi et al., 2009](#文献Harandi)). Orelabrutinib showed excellent selectivity against a panel of 456 kinases, and only had >90% inhibitory activity against BTK at a concentration of 1 μM. Ibrutinib’s inhibition of the other TEC family of non-receptor protein-tyrosine kinases is most likely associated with atrial fibrillation in the clinic ([Advani et al., 2013;](#文献Advani) [McMullen et al., 2014;](#文献McMullen) [Smith, 2015;](#文献Smith) [Tucker and Rule, 2015;](#文献Tucker) [Wang et al., 2013](#文献Wang)). Orelabrutinib is expected to overcome the above-mentioned safety issues and provide a safe and effective treatment option for the treatment of autoimmune diseases.

## 1.2 Study Background

### 1.2.1 Nonclinical Study

**1.2.1.1 Pharmacology**

Orelabrutinib is an irreversible BTK inhibitor, which can inhibit the activity of BTK enzyme. The 50% inhibition concentration value in the enzyme inhibition assay was 1.6 nM. BTK inhibition by orelabrutinib leads to reduced phosphorylation of BTK and of downstream PLC-γ2. Orelabrutinib has demonstrated to inhibit human primary B cell proliferation and B cell activation in human peripheral blood mononuclear cells, as measured by CD69+/CD20+ cells.

Anti-inflammatory activity of orelabrutinib was also proved in various autoimmune disease models in rodents. In a 6-month study in the MRL/lpr spontaneous SLE mouse model, orelabrutinib dramatically reduced inflammation, and improved survival rate as well as kidney function in treated animals. Efficacy was demonstrated at doses as low as 3 mg/kg/day, and complete disease protection was achieved at 10 mg/kg/day and 30 mg/kg/day. A similar effect was observed in Pristane-induced SLE mouse model, with dose-dependent inhibition of lupus related arthritis and improved kidney function. Moreover, in collagen-induced arthritis (CIA) models in mice and rats, orelabrutinib demonstrated a dose-dependent reduction of pro-inflammatory cytokines, improved arthritis histopathology scores and prevented joint damage. These results correlate well with BTK occupancy rates at respective dose levels. In mice, orelabrutinib demonstrated good oral bioavailability and prolonged target engagement of 100% for more than 8 hours after oral administration of 10 mg/kg/day. This effect was maintained even though the drug exposure in plasma had been quickly cleared to near detection limit 4 hours post-dose, which was consistent with the irreversible mechanism of action.

The kinase selectivity profile of orelabrutinib is distinct from that of ibrutinib, and it does not bind to EGFR, which can avoid adverse events such as diarrhea. The bleeding tendency of ibrutinib in clinical trials was probably due to the off-target inhibition of TEC kinase in platelets, while atrial fibrillation was possibly caused by off-target inhibition of bone marrow tyrosine kinase on chromosome X. The excellent selectivity of orelabrutinib also indicates the excellent safety characteristics of the study drug.

In conclusion, the prolonged pharmacodynamic effect, excellent selectivity and favorable safety profile further support the use of orelabrutinib in the treatment of autoimmune diseases such as SLE. The data of non-clinical studies (including pharmacodynamics, pharmacokinetics, and toxicology) of orelabrutinib are detailed in the Investigator's Brochure.

**1.2.1.2 Pharmacokinetics**

**(1) Absorption**

The PK evaluation of orelabrutinib was performed in rats and dogs. Orelabrutinib was absorbed fairly quickly (time to maximum concentration [Tmax] was 0.25-0.5 hours in rats and 0.45-2 hours in dogs), and had good oral bioavailability (approximately 20-75% in rats and 50-80% in dogs) which was superior to Ibrutinib (approximately 18-23% in rats and 7-11% in dogs) ([See Overview of pharmacodynamics of ibrutinib:](#伊布替尼PD综述) <https://www.accessdata.fda.gov/drugsatfda_docs/nda/2014/205552Orig2s000PharmR.pdf>). No accumulation of orelabrutinib was observed following repeated oral doses in both rats and dogs. The data were consistent with the *in vitro* permeability study which demonstrated that orelabrutinib had high permeability in the Caco-2 cell monolayer.

**(2) Distribution**

ICP-022 was highly bound to plasma proteins (90-97%) in all tested species, including mouse, rat, dog, monkey and human. After a single oral administration of [14C] ICP-022 in SD rats, the total radioactivity was measurable in all tested tissues, and was mainly distributed in the gastro-intestine tract wall, liver and kidneys.

**(3) Metabolism and Elimination**

After oral administration of [14C]orelabrutinib in male and female rats, a total of 18 metabolites were identified in their bile, urine and feces. The metabolic pathways of orelabrutinib in rats included: 1) Phase 1 oxidation and/or hydrogenation; 2) Phase 2 sulfurization, glutathione conjugation and its hydrolysis; 3) Phase I metabolite conjugation. Orelabrutinib was rapidly metabolized in liver microsomes *in vitro*. 15 radioactive metabolites of [14C]orelabrutinib were identified in *in vitro* metabolism studies in mice, rats, dogs, monkeys and human liver microsomes. The recombinant cytochrome P450 (CYP450) enzyme study found that orelabrutinib was predominantly metabolized by CYP3A4. In terms of the rate of elimination, the primary route to eliminate orelabrutinib was through feces (hepatobiliary).

**(4) Drug Interactions**

ICP-022 is not expected to have any clinically significant effect on human CYP450 enzymes, therefore, the risk of drug-drug interactions is low.

**(5) Pharmacokinetics/Pharmacodynamics (PK/PD)**

The degree of covalent binding of orelabrutinib to BTK, referred to herein as BTK occupancy, is related to its inhibitory effect on BTK activity. Therefore, BTK occupancy can be used as a pharmacodynamic marker. In preclinical PK/PD studies, orelabrutinib demonstrated prolonged pharmacodynamic effects after being cleared from circulation, which was consistent with the prolonged target occupancy, that is, occupancy for up to 24 hours after a single dose. This observation was consistent with the irreversibly binding mode of orelabrutinib and justified the once daily regimen.

**1.2.1.3 Toxicology**

**(1) Toxicology**

The results of a single oral administration of orelabrutinib in rats and dogs indicated that the possibility of acute toxicity was low. No death, clinical symptoms or weight loss were observed in the single-dose acute toxicity study in SD rats at 600 and 800 mg/kg of orelabrutinib, and no macroscopic changes were found in pathological examination. The tolerated oral dose of orelabrutinib in dogs was as high as 800 mg/kg, and vomiting was only observed at 400 and 800 mg/kg without other clinical symptoms. The maximum tolerated dose of a single dose of orelabrutinib in rats and dogs was 800 mg/kg.

**(2) Repeated-dose toxicity**

In the 4- and 26- week repeated-dose toxicity studies in SD rats, decreased lymphocytes (related to drug effect) and the pathological changes in pancreatic tissue were observed. The latter was the species-specific toxicity of BTK inhibitors in SD rats ([Erickson et al., 2017](#文献Erickson)). Pathological changes in thyroid tissue were also observed after repeated doses from 13 weeks to 26 weeks. However, based on the nature of thyroid morphological changes (only hypertrophy/hyperplasia) and the lack of toxicologically significant thyroid hormone changes, the above-mentioned thyroid histopathological changes were not considered harmful changes. Slight hepatocyte hypertrophy was observed in high-dose rats, but no other pathological changes or elevated liver enzymes (ALT, AST, etc.) were seen. Therefore, the liver morphological changes were not considered harmful changes. The rats after administration showed an increase in the proportion of extrasplenic hematopoiesis, which might be a response to the decrease or trend of decrease in red blood cell index.

The toxicity observed in the 4- and 13- week repeated dose toxicity study in Beagle dogs was consistent with above. Except for the transient vomiting during administration, the main manifestation was decreased splenic lymphocytes, which was an extended effect of the pharmacological action caused by BTK inhibition.

These changes were dose-dependent and reversible.

**(3) Toxicokinetics**

In the 4-week and 13-week repeated dose toxicity studies in SD rats and beagle dogs, and the embryo-fetal developmental toxicity studies in SD rats and rabbits, accompany toxicokinetic studies were carried out. The results showed that, except for the 13-week toxicity study in SD rats where a certain accumulation was observed at low-medium doses, no drug accumulation was observed in other studies. The plasma exposure increased with the dose.

**(4) Genotoxicity**

The genotoxicity of orelabrutinib was evaluated in a bacterial reverse mutation (Ames) assay, an in vitro chromosome aberration assay in Chinese hamster lung cells, and an in vivo rat micronucleus assay. ICP-022 was not mutagenic in the bacterial Ames assay nor clastogenic in the chromosome aberration assay, and did not increase micronucleus formation in rats at an oral dose of up to 800 mg/kg/day.

**(5) Reproductive Toxicity**

Oral administration of orelabrutinib in SD rats showed no significant effect on fertility and early embryo development, and the no-observed-adverse-effect-level (NOAEL) was 400 mg/kg. The embryo-fetal developmental toxicity study in SD rats and New Zealand rabbits indicated that oral orelabrutinib had no significant effect on embryo-fetal development. The NOAEL was 400 mg/kg and 100 mg/kg, respectively.

### 1.2.2 Clinical Studies

The first phase I clinical trial of orelabrutinib in healthy volunteers (ICP-CL-001) was carried out in Australia. This study was designed as a randomized, double-blind, placebo-controlled, parallel-group, dose-escalation study to evaluate the safety, tolerability, PK and PD of oral single and multiple ascending dose(s) of orelabrutinib. A total of 64 healthy subjects were enrolled (5 Asian, 54 white, 1 black, and 4 other races). This study wad divided to Part 1 (single-dose escalation, receiving 20, 50, 100, 200, and 400 mg of orelabrutinib, or placebo) and Part 2 (multi-dose escalation, receiving 100 mg QD, 200 mg QD, 100 mg BID of orelabrutinib, or placebo for 14 consecutive days). The phase I clinical study ICP-CL-00110 was carried out in China, and 6 healthy male subjects (all Asian) had been enrolled and received a single oral dose of 150 mg [14C]orelabrutinib suspension. During the study, samples of whole blood, plasma, urine and feces were collected at specified time points/intervals. The absorption, distribution, metabolism, and excretion of [14C]orelabrutinib after a single oral dose were evaluated. In addition, a number of phase I or phase II clinical studies of orelabrutinib have been carried out in patients with B-cell lymphoma (ICP-CL-00102, ICP-CL-00103, ICP-CL-00104, ICP-CL-00105, ICP-CL-00106). The National Medical Products Administration (NMPA) has approved orelabrutinib for the treatment of relapsed/refractory chronic lymphocytic leukemia/small lymphocytic lymphoma (r/r CLL/SLL) and relapsed/refractory mantle cell lymphoma (r/r MCL).

At present, BTK inhibitors are still mainly investigated for tumor treatment, and other BTK inhibitors mainly include Ibrutinib, Acalabrutinib, BGB-3111, GS-4059 and so on. However, the use of BTK inhibitors for the treatment of SLE has attracted the attention of more and more investigators. Globally, products from many companies have entered clinical trials, mainly including M-2951 from Merck, AC-0058TA from ACEA, and GDC-0853 from Genentech. Up to now, none of these clinical studies have published results.

**Table 1. BTK Inhibitors Under Development**

| **Phase** | **NCT No.** | **Study No.** | **Company** | **Status** |
| --- | --- | --- | --- | --- |
| Phase Ⅰ | NCT02537028 | M-2951 | EMD serono / Merck KGaA | Completed |
| NCT03878303 | AC-0058TA | ACEA | Ongoing |
| Phase Ⅱ | NCT02908100 | GDC-0853 | Genentech | Ongoing |
| NCT02975336 | M-2951 | EMD serono / Merck KGaA | Ongoing |

**1.2.2.1 Clinical Safety Findings**

Study ICP-CL-001 showed that all TEAEs that occurred with orelabrutinib during the study were mild or moderate in severity (only 1 case of moderate constipation) and recovered before the end of the study. During the study period, no DLT occurred and MTD was not reached. No serious TEAEs, TEAEs leading to withdrawal, or TEAEs leading to death occurred during the study. No safety issues were observed in vital signs, physical examination, or electrocardiography assessments.

In the Study ICP-CL-00110, two subjects experienced adverse events, namely: blood bilirubin increased (Grade 2, 1 case), blood bilirubin unconjugated increased (Grade 2, 1 case). Both of these adverse events were abnormalities in laboratory tests (blood chemistry), and both recovered spontaneously without intervention. No drug-related TEAEs, Grade ≥ 3 TEAEs, TEAEs leading to discontinuation, or serious TEAEs occurred during the study. No safety issues were noted in vital signs, physical examination, or electrocardiography assessments.

In the 5 clinical trials of orelabrutinib in the treatment of B-cell lymphoma, as of the date of data update (see the investigator’s brochure for details), a total of 266 patients had received orelabrutinib at a dose ≥150 mg/day, with a median treatment duration of 11.0 months. The safety results showed that most of the TEAEs and TRAEs in orelabrutinib-treated patients was CTCAE Grade 1 or 2 in severity. The major adverse events were basically similar to those reported by other BTK inhibitors. For the occurrence of TEAEs, Grade ≥3 TEAEs, serious adverse events, etc. as well as their specific data, please refer to the investigator's brochure.

The Phase I study of M-2951 developed by Merck for the treatment of SLE has been completed, and the Phase II study is in progress, and no results have been published yet. However, a phase II study (NCT02784106) of M-2951 in the treatment of rheumatoid arthritis (Rheumatoid Arthritis, RA) has published some clinical study findings. The study was designed as a placebo-controlled study and divided into two periods: a 12-week double-blind period and a 26-week open-label period. A total of 65 subjects had completed the study. In the double-blind period, the adverse event rates in the study group and the placebo control group were 51.5% and 40.6%, respectively, and in the open-label period, they were 47.6% and 44.4%, respectively. During the entire study, only one subject (double-blind phase) experienced two SAEs: central vertigo (3.0%) and vestibular disorder (3.0%).

**1.2.2.2 Clinical Pharmacokinetics**

The pharmacokinetic analysis of the clinical phase I study showed that the half-life of orelabrutinib in humans was 3-4 hours, and the plasma exposure increased with dose in a linear manner, specifically, in the dose range of 20 mg to 400 mg, the exposure (AUC) increased from 425 hr*ng/mL to 12669 hr*ng/mL. Cmax increased from 88 ng / mL to 2553 ng / mL, which also increased with dose in a linear manner. The inter-individual variability was relatively small, with a coefficient of variation (CV%) between 10-36%. The subject population included 5 Asians, and their pharmacokinetic properties were not significantly different from those of other races. A high-fat diet showed no significant effect on pharmacokinetics. No drug accumulation was observed after 14 consecutive days of administration. The exposure of orelabrutinib in the human body was obviously higher than that of Ibrutinib and BGB-3111. The exposure of orelabrutinib at a dose of 400 mg was 12669 hr * ng / mL, which was 16 times the exposure (802 hr * ng / mL) of Ibrutinib at the FDA-approved dose of 560 mg, also about 8 times the exposure of BGB-3111 at a clinical Phase III dose of 160 mg. The human plasma protein binding rate of orelabrutinib was 93.5%, and the reported human plasma protein binding rate of Ibrutinib was 97.5%, therefore, the free orelabrutinib in the body will also be significantly higher than that of Ibrutinib, which is expected to produce superior efficacy and safety.

**1.2.2.3 Clinical Pharmacodynamics**

Preliminary pharmacodynamic studies showed that when orelabrutinib was dosed at 20 mg, the BTK occupancy rate in the PBMC of the subject reached 60-80%, and the PD effect lasted for more than 24 hours, however when dosed at 50 mg or above, the BTK occupancy rate exceeded 97% and the effect remained above 24 hours. Considering the in vivo exposure, the in vivo exposure of orelabrutinib at 50 mg was comparable to that of BGB-3111 at a clinical dose of 160 mg, more than twice that of ibrutinib at the clinical dose of 560 mg. Moreover, nearly complete BTK occupancy rate was achieved at 50 mg, therefore, it is expected to be a clinically efficacious dose.

## 1.3 Risk-Benefit Assessment

The prediction of risks and benefits of orelabrutinib is mainly based on the safety data from the completed pre-clinical trials, the preliminary data from phase I dose-finding studies, and clinical study findings of other BTK inhibitors.

Based on the pre-clinical data of orelabrutinib and the clinical study findings of other BTK inhibitors such as Ibrutinib, Acalabrutinib, BGB-3111, GS-4059, etc., the adverse reactions that may occur in the orelabrutinib clinical trial and their monitoring and treatment measures are shown in Table 2.

**Table 2. Adverse Reactions that May Occur in Orelabrutinib Clinical Trials and Corresponding Monitoring and Treatment Measures**

| **Adverse Reactions that may occur** | **Monitoring Measures** | **Treatment Measures** |
| --- | --- | --- |
| **Gastrointestinal Reactions** | Eliciting and recording Adverse Events at any follow-up | Anti-emetic and anti-diarrhea drugs can be used for Grade ≥2 gastrointestinal reactions. |
| **Asthenia** | Eliciting and recording Adverse Events at any follow-up | For Grade ≥2 asthenia, symptomatic treatment can be given as clinically needed. |
| **Hypertension** | A blood pressure test will be performed at baseline, each follow-up visit during treatment period, and at the end of the study. | Corresponding medical treatment can be given for Grade ≥2 hypertension. |
| **Hematology Toxicities** | A haematology test will be performed at baseline, each follow-up visit during treatment period, and at the end of the study. | For Grade 3 hematological toxicity, corresponding medical treatment can be given. |
| **Pyrexia** | A physical examination will be performed at baseline, each follow-up visit during treatment period, and at the end of the study. | Corresponding medical treatment can be given for Grade ≥1 pyrexia. |
| **Rash** | Eliciting and recording Adverse Events at any follow-up | Corresponding medical treatment can be given for Grade ≥2 rash and hand-and-foot syndrome. |
| **Liver function change** | A liver function test will be performed at baseline, each follow-up visit during treatment period, and at the end of the study. | Corresponding medical treatment can be given for Grade ≥2 liver function change. |
| **Haemorrhagic events** | A coagulation test will be performed at baseline, each follow-up visit during treatment period, and at the end of the study. | Corresponding medical treatment can be given for Grade ≥2 haemorrhagic events. |
| **Cardiotoxicity** | An ECG examination will be performed at baseline, each follow-up visit during treatment period, and at the end of the study. | For Grade ≥2 cardiotoxicity, corresponding treatment can be given according to clinical needs. |
| **Renal Function Abnormalities** | A urinalysis and renal function test will be performed at baseline, each follow-up visit during treatment period, and at the end of the study. | For Grade ≥2 renal function abnormal, corresponding treatment can be given according to clinical needs. |
| **Pancreatic enzymes abnormal** | An amylase test will be performed at baseline, each follow-up visit during treatment period, and at the end of the study. | For Grade ≥2 pancreatic enzymes abnormal, corresponding treatment can be given according to clinical needs. |

# 2 Study Objectives and Endpoints

## 2.1 Study Objectives

### 2.1.1 Primary Objectives

To evaluate the safety and tolerability of orelabrutinib in mild-moderate SLE patients.

### 2.1.2 Secondary Objectives

1) To evaluate the pharmacokinetics (PK) of orelabrutinib in mild-moderate SLE patients;

2) To evaluate the pharmacodynamics (PD) of orelabrutinib in mild-moderate SLE patients;

3) To evaluate the PK/PD relationship of orelabrutinib in mild-moderate SLE patients;

4) To evaluate the efficacy of orelabrutinib in mild-moderate SLE patients.

## 2.2 Study Endpoints

### 2.2.1 Primary Endpoints

1) the occurrences of Treatment-emergent Serious Adverse Events (TESAEs) and Treatment-related Serious Adverse Events (TRSAEs);

2) The occurrences of Treatment Emergent Adverse Events (TEAEs) and Treatment Related Adverse Events (TRAEs), as evaluated by severity;

3) vital signs, electrocardiogram (ECG), and laboratory findings.

### 2.2.2 Secondary Endpoints

1) Target Occupancy Rate:

- BTK occupancy rate (Days -1, 1, and 14).

2) Pharmacodynamics: The followings biomarkers are selected to evaluate the pharmacodynamics of orelabrutinib:

- Serum immunoglobulin (Ig) levels (IgA, IgG, IgM) at Days 28 and 84;
- Changes from baseline in Ig levels (IgA, IgG, IgM) and C3 and C4 levels at Days 28 and 84;
- Changes from baseline in serum anti-dsDNA antibody and ANA at Days 28 and 84;
- Changes from baseline in cytokine expression levels (IFN-α and IL-6) at Days 28 and 84;
- Changes from baseline in total B cell counts at Days 28 and 84;
- Changes from baseline in effector B cell counts (Beffs)at Day 28s and 84;
- Changes from baseline in regulatory B cell counts (Bregs) at Days 28 and 84;
- Changes from baseline in the ratio of Bregs to Beffs (Bregs/Beffs) at Days 28 and 84;
- Changes from baseline in erythrocyte sedimentation rate at Days 28 and 84.

3) Pharmacokinetics: To evaluate the pharmacokinetic characteristics through the plasma concentration-time curve and pharmacokinetic parameters after administration of orelabrutinib, including: maximum concentration (Cmax); time to maximum concentration (Tmax); half-life (T1/2); area under the drug concentration-time curve (AUC); apparent clearance (CL/F); terminal apparent volume of distribution (Vz/F); accumulation factor (R), etc.

4) Efficacy

- The responser ratio, as measured by SLE Responder Index-4 (SRI-4) at Days 28 and 84;
- The responser ratio, as measured by SRI-6, between Days 28 and 84;
- The rates of the SLE disease activity index-2000 (SLEDAI-2K) score at Days 28 and 84 decreased by 4 points from the baseline;
- Change in the proportion of subjects at Day 84 whose arthritis and/or rash have resolved relative to baseline (as measured by SLEDAI-2K);
- The change from baseline in counts of painful joints, tender joints, and swollen joints (66/88 joint counts) at Days 28 and 84, in subjects with arthritis at baseline;
- The proportion of subjects with proteinuria ≤0.5 g/24 h or a decrease of ≥25% from baseline at Day 84, in subjects with baseline proteinuria >0.5 g/24 h.

# 3 Study Design

## 3.1 Overall Design of the Study

This study is designed as a randomized, double-blind, placebo-controlled trial. It includes a screening period (no more than 28 days after the subject signs the informed consent to the first dose), a treatment period (12 consecutive weeks after the first dose), and a follow-up period (28 days after the last dose). The schematic diagram of the overall design of the study is as follows:

**Treatment period**

**Once daily PO for 12 weeks**

Randomization at D1

**Placebo (n=15)**

**Screening period**

**Day -28 to -1**

**Follow-up**

**28days after last dose**

**ICP-022 50mg (n=15)**

**ICP-022 80mg (n=15)**

**ICP-022 100mg (n=15)**

**Figure 1： Schematic Diagram of the Clinical Study Procedures**

The subjects to be included in this study should be patients undergoing standard treatment. These patients will be randomized into the placebo group (n=15) and the orelabrutinib group (n=45), of which the orelabrutinib group will be divided into three cohorts: 50 mg (n=15), 80 mg (n=15) and 100 mg (n=15). The study drug will be taken orally once a day for 12 weeks.

## 3.2 Dose-selection Rationale

The Phase I clinical study (ICP-CL-001) in healthy subjects in Australia demonstrated that orelabrutinib was safe and well tolerated. At dose range of 20-400 mg (single dose) and 100-200 mg QD for two weeks, most adverse events (AEs) were mild or moderate. No DLT was observed and no drug-related SAE was reported. The maximum tolerated dose was not reached. The plasma exposure of orelabrutinib increased proportionally with the dose. At doses ≥50 mg, BTK occupancy lasted for 24 hours. Based on the data from the Phase I clinical study, the dose 50 mg QD selected for this study is justifiable.

## 3.3 Definition of End of Study

A subject will be considered having completed the study if he/she has completed all periods of the study, including the last visit or the last scheduled procedure listed in the study schedule.

The end of study is defined as the date of the last visit of the last subject in the study.

This study can be ended early if there is sufficient ground, such as regulatory agency’s decision, changes in the opinion of the ethics committee, the safety of the study drug, or the judgment of the sponsor. In addition, the sponsor reserves the right to terminate the study at any time.

# 4 Study Population

## 4.1 Inclusion Criteria

Subjects eligible for the study must meet all of the following criteria:

1. Able to provide written informed consent.
2. Male or female subjects aged 18-75 years.
3. Diagnosis of SLE at >6 months before signing the informed consent, meeting at least 4 out of 11 criteria of American College of Rheumatology (ACR) classification criteria for SLE.
4. The total score of SLEDAI-2K at screening is 5-12 (including cut-off value).
5. Currently under standard treatment for SLE and has been treated for at least 3 months. The standard treatment for SLE can be corticosteroids, and/or antimalarials (such as chloroquine or hydroxychloroquine), and/or immunosuppressants (such as azathioprine, methotrexate, mycophenolate mofetil, or sodium mycophenolate, cyclosporine, leflunomide, tacrolimus, sirolimus, mizoribine, 6-mercaptopurine, iguratimod or thalidomide).
6. Anti-dsDNA antibody positive and/or ANA positive and/or anti-Smith antibody positive, all based on the normal reference ranges provided by the local hospital.

## 4.2 Exclusion Criteria

Subjects who meet any of the following criteria will be excluded from this study:

1. Not able to abide by the protocol requirements.
2. Females who are pregnant or breastfeeding or intend to become pregnant during the study or male partners.

- Pregnancy test is not required for women of non-childbearing potential who have been postmenopausal (at least 12 months of non-therapy-induced amenorrhea) or surgically sterilized (absence of ovaries and/or uterus).

1. Prior exposure to a BTK inhibitor.
2. Suffering from Neuropsychiatric Systemic Lupus Erythematosus (NPSLE), manifested as mental confusion, organic encephalopathy syndrome, cranial nerve disease, lupus headache, or new cerebrovascular accident, etc.).
3. Severe or rapidly progressive type III or IV glomerulitis, simple type V or VI lupus nephritis, or active nephritis that requires the use of drugs prohibited by the protocol, or active nephritis that requires hemodialysis treatment.
4. Suffering from other autoimmune diseases except SLE (excluding secondary Sjogren’s syndrome).
5. Subjects who intend to start or change anti-SLE treatment after the screening visit.
6. Prior corticosteroids given in excess of prednisone 25 mg/day or its equivalent or previously changed the corticosteroid dose, within the 28 days before randomization.
7. Have started any angiotensin-converting enzyme inhibitor or angiotensin receptor blocker, or nonsteroidal anti-inflammatory drug (NSAID) or changed their doses, within 1 week before screening or during screening.
8. Have started the following antimalarials or immunosuppressants within 3 months before randomization, or changed their doses within 28 days before randomization:

- Antimalarial drugs, including chloroquine or hydroxychloroquine;
- Immunosuppressants, including methotrexate, azathioprine, mycophenolate mofetil or sodium mycophenolate, cyclosporine, tacrolimus, sirolimus, leflunomide, mizoribine, 6-mercaptopurine, iguratimod or thalidomide.

1. Have used rituximab, epratuzumab, or any other B-cell depletion treatment within 12 months before randomization.
2. Have used cyclophosphamide and chlorambucil within 6 months before randomization.
3. Have received belimumab, tumor necrosis factor (TNF) blockers, interleukin receptor blockers or other biological agents, intravenous immunoglobulin, or plasma exchange therapy, within 3 months before randomization (or 5 half-lives, whichever is longer).
4. Have participated in any other clinical trial or have used any investigational drug or other immunosuppressants/modulators (unless approved by the medical monitor) within 28 days before the screening period (or 5 half-lives, whichever is longer).
5. Have received cyclosporine A topical cream/ointment preparations (except ophthalmic drugs), strong topical glucocorticoids (as per World Health Organization coding dictionary) or other local immunomodulators (such as tacrolimus, pimecrolimus) withing 28 days before randomization.
6. Vaccination with live or live-attenuated virus vaccine within 1 month before screening or during screening.

- Patients who have been vaccinated against Streptococcus pneumoniae vaccine (23-valent pneumococcal polysaccharide vaccine or 13-valent pneumococcal conjugate vaccine) as per local guidelines are allowed;
- For subjects who have received one or more influenza vaccines during screening, an interval of at least 2 weeks from the date of vaccination to the first administration of the study drug is required.

1. Active and uncontrolled infection (clinically significant viral, bacterial or fungal infection, etc.), or any severe infection that requires hospitalization in the past 6 months; or have received anti-infective treatment recently (within 14 days before the first dose).
2. Herpes zoster infection within 12 weeks prior to screening, or a history of disseminated/complex herpes zoster (eg: multiple skin involvement, ocular herpes zoster, central nervous system involvement, or postherpetic neuralgia).
3. Positive tuberculosis screening during the screening period (as per the interferon-γ release assay for the diagnosis of tuberculosis, including T-SPOT®, etc.), or patients with active or latent tuberculosis, or tuberculosis patients who have not completed the appropriate standard treatment.
4. The interval between the last dose of the CYP3A4 inhibitor and the first dose of investigational drug is less than 5 half-lives of CYP3A4 inhibitor.
5. Known human immunodeficiency virus (Human Immunodeficiency Virus, HIV) infection, as evidenced by positive serological test.
6. Current or history of Central Nervous System (CNS) diseases, such as epilepsy, CNS vasculitis or neurodegenerative diseases, patients with a history of stroke who have had a stroke or transient ischemic attack within 2 years before screening, or have residual neurological defects as judged by the investigator.
7. Major and uncontrolled concomitant diseases (including poorly controlled diabetes and related medical history) that may affect compliance with the protocol or the interpretation of study results.
8. Major surgery or major traumatic injury (excluding biopsy) within 28 days before the first administration, or major surgery is expected during the study treatment period.
9. Clinically documented cardiovascular diseases that are obviously unstable or not effectively treated, such as heart disease class III or IV according to the New York Heart Association (NYHA) classification (see Appendix 3 for details), or have had myocardial infarction, malignant arrhythmia, unstable angina pectoris in the past 6 months, or hypertension that cannot be controlled by medication.
10. Significant active lung disease (such as interstitial lung disease and/or obstructive lung disease, etc.).
11. Any other disease, metabolic dysfunction, physical examination findings, or clinical laboratory findings that may be contraindicated to use the study drug.
12. HBV [Hepatitis B Surface Antigen (HBsAg)] or HCV antibody positive, or the HBV DNA positive by Polymerase Chain Reaction (PCR) test for patients with Hepatitis B Core Antibody (HbcAb) positive.
13. Abnormal tissue or organ functions, as evidenced by the following laboratory tests before randomization:

- Absolute neutrophil count (ANC) < 1.5 x 109/L; platelet < 75 x 109/L; hemoglobin<90 g/L; lymphocyte count<0.8 x 109/L;
- Total bilirubin>1.5 x Upper Limit of Normal (ULN) (for subjects with history of Gilbert syndrome, >3 x ULN); aspartate aminotransferase (AST) or alanine aminotransferase (ALT)>2 x ULN;
- Estimated glomerular filtration rate < 40 ml/min/1.73m2 from the Modification of Diet in Renal Disease (MDRD) formula;
- Protein urine in 24 hours ≥3.5 g.

## 4.3 Lifestyle Considerations

### 4.3.1 Contraception

Female and male subjects with fertility must use effective contraceptive measures during the entire study period. The investigator or his/her designated personnel shall inform and instruct the subjects on continuous and correct contraception.

Effective contraceptive measures include but are not limited to the following:

1. Abstinence
2. Intrauterine device
3. Barrier contraceptives (contraceptive diaphragm with spermicide, or cervical cap with spermicide, or male condom)
4. Vasectomy
5. Fallopian tube ligation or hysterectomy
6. Other methods of contraception approved by the investigator

### 4.3.2 Visit Requirements

During the treatment period, a subject is not allowed to leave the study center if the visit schedule specified in the protocol has not been completed and without the permission of the investigator.

## 4.4 Screening Failure

Screening failure is defined as withdrawal from the study after signing the informed consent form but prior to randomization. Subjects who fail the screening should be recorded in the source documents as well as Electronic Case Report Forms (eCRFs), but no further follow-up is required.

Subjects who fail the screening can be re-screened. Subjects will be given a new screening number at re-screening.

# 5 Investigational Drugs

## 5.1 Investigational Drugs and Administration

### 5.1.1 Basic Information for the Investigational Drugs

|  | **Study Drug** | **Placebo** |
| --- | --- | --- |
| Name | Orelabrutinib | Orelabrutinib simulant |
| Dosage Form | Tablets | Tablets |
| Strength | 10 mg；50 mg | / |
| Storage Conditions | Keep away from light and store in a sealed container. See drug label for details | Keep away from light and store in a sealed container. See drug label for details |

The investigational drugs will be provided by Beijing InnoCare Pharma Tech. Co. Ltd.. The manufacturing date and expiry date will be available at the time of use, please pay attention to check.

### 5.1.2 Dosage and Administration

Subjects should be instructed to take orelabrutinib (50 mg, 80 mg or 100 mg) or placebo orally according to the protocol, once daily, at the same time every day. Take it with water each time and swallow the entire tablet without chewing or breaking. The treatment duration is 12 weeks.

If a subject misses a dose of the study drug and it is within 12 hours from the original time, he/she can take the drug as soon as possible; but if it has been more than 12 hours from the original time, he/she should skip the missed dose and return to the normal schedule for the next dose.

### 5.1.3 Dose Modification

For mild and moderate treatment-related toxic reactions (adverse events will be graded as per DMID2007), subjects can continue the treatment at the current dose.

For severe drug-related toxic reactions, the investigator should suspend or terminate treatment according to the following dose modification rules, deal with relevant toxic reactions depending on clinical conditions, and increase follow-ups accordingly.

**Dose Modification Rules**

- Treatment will be withheld for individual subjects under any of the following conditions, and treatment will be given depend on the clinical situation.
- Grade 4 neutropenia (lasting > 7 days, early withdrawal is acceptable if clinically indicated)
- Grade 4 thrombocytopenia (lasting > 7 days, early withdrawal is acceptable if clinically indicated)
- Grade ≥3 febrile neutropenia;
- Grade ≥3 thrombocytopenia associated with haemorrhage
- For at least possibly related toxicities of Grade ≥3 (including hematological and non-hematological toxicity), study drug will be withheld until recovery to Grade ≤ 1 within 14 days, or study drug will be discontinued.
- For any toxicity assessed by the investigator as at least possibly related to the study drug, the study drug treatment can be withheld or terminated at the investigator’s discretion. Any interruption of more than 14 days will result in permanent discontinuation of the study drug.

## 5.2 Preparation/Processing/Storage/Responsibility

### 5.2.1 Receipt and Inventory of the Investigational Drug

The investigational drugs will be provided by Beijing InnoCare Pharma Tech. Co. Ltd., and will be distributed to study centers as planned. After the receipt of the investigational drugs, the study center should confirm the receipt in writing.

The study center should assign a dedicated person to be responsible for the receipt, storage, distribution, and return of the investigational drugs, and maintain corresponding records. The investigator and his/her personnel must ensure that the drug can only be used in this clinical trial.

This study requires the return of unused study drugs. All unused and/or partially used study drugs as well as their packaging, after the study center completes the inventory record, will be returned to a third party designated by the sponsor for destruction.

### 5.2.2 Packaging and Labeling of Drugs

The packaging and labeling of the study drug orelabrutinib in this study will be provided by Beijing InnoCare Pharma Tech. Co. Ltd..

The label of the study drug contains the following information: for clinical trial use only, protocol number, batch number, specification, drug number, sponsor, storage conditions, expiry date, dosage & administration, etc.

### 5.2.3 Storage and Stability

Orelabrutinib tablets are packaged in a high-density polyethylene bottle with a polypropylene child-resistant combination cap. The bottle is sealed and contains 1 g of silica gel desiccant.

The medicine bottle should be stored at room temperature. See the label on the medicine bottle for details.

Stability studies for the tablet are conducted using both early development and clinical batches. Orelabrutinib tablets are stable for 24-month as indicated by the 6-month accelerated stability test (40 °C, RH75%) and 24-month long-term stability test (25 °C, RH60%). The ongoing long-term stability test covers new clinical batches, and the results of this investigational new drug will be updated when test results are available.

## 5.3 Methods to Minimize Bias: Randomization and Blinding

### 5.3.1 Randomization

A randomization table will be generated by an unblinded statistician independent of the project, and an interactive website response system (IWRS) will be used to randomize the subjects into groups. The subjects will be assigned to 4 groups at a ratio of 1:1:1:1, namely the study groups (3 dose groups) and the placebo group.

For randomized subjects who withdraw or are withdrawn from the clinical trial for any reason, regardless of whether they have used the study drug or not, their randomization number will be retained, and the subject will not be allowed to re-enter the trial.

### 5.3.2 Blinding

This study is to be conducted as a double-blind study. Therefore, the study drug orelabrutinib and placebo will be packaged uniformly to make the packaged drugs have identical appearance. The sponsor or the sponsor’s agent should appoint a person to be responsible for randomization, who will maintain the randomization list in accordance with the relevant SOP. Any intentional or unintentional unblinding should be notified to the sponsor in time.

Emergency unblinding: In the event of a serious adverse event that requires emergency unblinding, it is recommended that the investigator consult with the sponsor to decide whether the emergency unblinding is necessary. The investigator should record in detail the relevant information such as the date, time, and reason for unblinding in the source document, and notify the sponsor in time.

Once an emergency unblinding occurs, the subject needs to be withdrawn from the study.

## 5.4 Subject Compliance

Drug return, counting, and dispensation will be performed at each visit according to requirements.

Drug return will be performed at Days 14, 28, 56 and 84 and medication compliance will be assessed. Medication compliance will be calculated and evaluated by counting the number of medications returned by the subjects, reviewing the subjects' medication diary, and asking the subjects about their drug usage and loss.

Medication compliance = The number of tablets taken since the last drug dispensation/The number of tablets that should be taken since the last drug dispensation.

The medication compliance should be ≥ 80% and ≤120%. If a subject’s medication compliance does not meet the above requirements, the investigator must communicate with the subject in a timely manner to improve the subject’s awareness of medication.

## 5.5 Concomitant Medication

All concomitant medications used during the study must be recorded in the eCRF, including the generic name of the medication and the start and end dates of treatment. Any changes in the concomitant medications that have been recorded should also be recorded.

### 5.5.1 Prohibited Drugs

The following are prohibited during the study and for at least 28 days or 5 half-lives (whichever is longer) after the last dose.

- Live or live-attenuated virus vaccine;
- Other drugs under investigation (drugs that have not been approved for marketing) except for this study drug;
- New immunotherapies (such as corticosteroids, methotrexate, mycophenolate mofetil or sodium mycophenolate mofetil, azathioprine, hydroxychloroquine sulfate, cyclosporine, tacrolimus, leflunomide, abatacept, intravenous immunoglobulin, plasma exchange, cyclophosphamide, chlorambucil, rituximab, belimumab, biological products, etc.) (except for the treatment of AE), except the immunosuppressants that have been used to treat SLE before enrollment;
- CYP3A4 inhibitors, such as clarithromycin, telithromycin, acetomycin, itraconazole, ketoconazole, posaconazole, voriconazole, boceprevir, telaprevir, Cobicistat, Conivaptan, Elvitegravir, Mibefradil, Nefazodone, Indinavir, Lopinavir, Nelfinavir, Ritonavir, Saquinavir, Aptivus, etc.

### 5.5.2 Permitted Drugs

Medical treatments and medications for SLE that have been used before enrollment are allowed;

During the study, the investigator can give corresponding supportive treatment based on his/her judgment after evaluating the causality between the adverse event and study drug. The start and duration of supportive treatment will be recorded. The permitted treatments include but are not limited to antiemetics, antidiarrheal, antipyretic, antiallergics, treatment for rash, antihypertensives, analgesics, antibiotics and other products such as blood products. All concomitant medications received by the subject and the reason for use should to be fully recorded. Regarding the use of supportive treatment, please refer to the following standards:

- For moderate non-hematological toxicity, corresponding medication can be given (see section 8.2.4.1 for the classification criteria of mild, moderate and severe adverse events);
- For severe hematological toxicity, corresponding medication can be given, and treatment should be carried out in accordance with relevant clinical guidelines, such as the American Society of Clinical Oncology (ASCO) guidelines, etc.;
- For hemoglobin 6.0-8.0 g/dL, erythropoietin therapy can be given; for hemoglobin less than 6.0 g/dL, blood component transfusion can be given;
- For platelet count less than 50.0 x 109/L, interleukin 11 or thrombopoietin could be given; For platelet count less than 25.0 x 109/L or associated with a bleeding tendency, blood component transfusion can be given;
- For neutrophils <1.0~0.5 x 109/L not accompanied by pyrexia, G-CSF and other cytokines can be given; For severe neutropenia, cytokine therapy can be given;
- Corticosteroids: External preparations (eg for rash), inhalation sprays (eg for obstructive airway disease), eye drops or local injections (eg intra-articular medication) are allowed;
- For common adverse reactions including but limited to hand and foot syndrome, hypertension, diarrhea, proteinuria, and hyperlipidaemia, symptomatic treatment is allowed during the study.

# 6 Study Procedures

## 6.1 Screening Visit (Days -28 to -1)

Subjects can only participate in the screening physical examination after signing the informed consent. The screening period is from Day -28 to Day -1. The items to be completed during the screening period are shown in Table 3. On Day -1, blood samples for the target occupancy test will be collected.

Depending on the clinical situation, the investigator should perform relevant tests such as Coombs, anticardiolipin antibody test, lupus anticoagulant test and haptoglobin test as indicated by BILAG criteria.

**Table 3. Screening Items**

| **Items** | **Notes** |
| --- | --- |
| **Study Procedures** | |
| Signing Informed Consent | Prior to screening |
| Inclusion/Exclusion criteria | Review of Inclusion/Exclusion criteria |
| Demography | Date of birth, gender, height, and weight. |
| Medical history and treatment history | Medical history includes history of: current diseases, past diseases, medication, allergy, drinking, drug abuse, clinical trials, etc. |
| Concomitant medication records | Record concomitant medication |
| **Safety Evaluation** | |
| Physical examination | A complete physical examination (mainly including general conditions, skin, head and neck, chest, abdomen, back, limbs and basic nervous system, etc.) |
| Vital signs | body temperature, blood pressure, respiration, pulse |
| Hematology | complete blood count, i.e. white blood cells (WBC) including lymphocytes and neutrophils, red blood cells (RBC), hemoglobin, hematocrit and platelets. |
| Urinalysis | protein, glucose, red blood cells urine (qualitative or quantitative results, including occult blood or blood urine) |
| Blood chemistry | aspartate aminotransferase (AST), alanine aminotransferase (ALT), γ-glutamyltransferase (GGT), albumin (ALB), total bilirubin (TBIL), direct bilirubin (DBIL), urea nitrogen (BUN), serum creatinine (Cr), triglycerides (TG), cholesterol total (TC), glucose (Glu), lactate dehydrogenase (LDH) |
| Electrolytes | potassium (K), sodium (Na), chlorine (Cl), calcium (Ca), magnesium (Mg), phosphorus (P) |
| Amylase | Serum amylase |
| Lipase | Serum lipase |
| Coagulation | international normalized ratio (INR), prothrombin time (PT), and activated partial thromboplastin time (APTT) |
| 5 items of thyroid function | Thyroid-stimulating hormone (TSH), free triiodothyronine (FT3), free thyroxine (FT4), total triiodothyronine (TT3), total thyroxine (TT4) |
| Ultrasound thyroid | Ultrasound thyroid |
| Chest X-ray | Perform frontal and lateral chest X-rays |
| SLE antibody | anti-Smith antibody |
| Blood pregnancy test | Human chorionic gonadotropin (HCG) only for female subjects of childbearing potential |
| TB screening | Interferon-γ release assay |
| serology HIV, HBV, HCV tests | |  | Included | Excluded | | --- | --- | --- | | HIV | Antibody (-) | Antibody (+) | | HBV | HBsAg(-) | HBsAg(+) | | HBsAg(-),  HBcAb(+) and HBV DNA negative | HBsAg(-),  HBcAb(+) and HBV DNA positive | | HCV | Antibody (-) | Antibody (+) | |
| Electrocardiography | Standard 12-lead ECG |
| Echocardiography | Left Ventricular Ejection Fraction (LVEF) |
| Adverse event recording | / |
| **Other Evaluations** | |
| PD study | serum Ig levels, complement C3, complement C4, anti-dsDNA antibody, ANA |
| Target Occupancy | BTK occupation |
| Protein urine 24-hour quantification | urine protein 24-hour quantitative determination is required during the screening period. |
| SLEDAI-2K | Perform SLEDAI-2K evaluation |
| BILAG-2004 | Perform BILAG-2004 evaluation |
| PGA | Perform PGA evaluation |
| Joint evaluation | 66/68 joint counting |

## 6.2 Visits During the Study

### 6.2.1 Visits During the Treatment Period (Day 1-84)

Depending on the clinical situation, the investigator should perform relevant tests such as Coombs, anticardiolipin antibody test, lupus anticoagulant test and haptoglobin test as indicated by BILAG criteria. The haematology, urinalysis, blood chemistry, electrolytes, amylase & lipase, and coagulation results within 5 days before the first dose can be accepted at D1. If more than 5 days, the tests should be repeated at D1. Each subject will be assigned a randomization number before the Day 1 administration.

**Table 4. Items for Treatment Period Visits**

| **Items** | **Notes** |
| --- | --- |
| **Study Procedure Management** | |
| Concomitant medication records | Record concomitant medication |
| Demographics | Only body weight |
| Randomization | A randomization number will be assigned before the Day 1 administration. |
| **Study Procedures** | |
| Orelabrutinib administration | Once per day |
| Drug dispensation | Days 1, 14, 28, 56 |
| Drug return | Days 14, 28, 56, 84 |
| Medication compliance | Days 14, 28, 56, 84 |
| **Safety Evaluation** | |
| Physical examination | Pre-dose at Days 1, 14, 28, 56 and 84 |
| Vital signs | Pre-dose at Days 1, 14, 28, 56 and 84 |
| Haematology, blood chemistry, urinalysis, electrolytes, amylase, lipase | Pre-dose at Days 1, 14, 28, 56 and 84 |
| Coagulation | pre-dose at Days 1, 28, 56, 84 |
| 5 items of thyroid function | pre-dose at Days 28 and 84 |
| Ultrasound thyroid | Days 28 and 84, results within ±5 days can be accepted, regardless of medication status. |
| Urine pregnancy test | Pre-dose at Days 1, 28, 56 and 84. If positive, blood pregnancy test will be performed to confirm the result. |
| HBV DNA test | as clinically indicated |
| Chest X-ray | as clinically indicated |
| 12-lead-ECG | Pre-dose and post-dose at Day 1; prior to the discharge from the study center at Day 2.  Post-dose at Days 14, 28, 56 and 84 【post-dose ECG during treatment period should be performed within 2-4 hours post-dose】. |
| Echocardiography | as clinically indicated |
| Adverse event recording | Record adverse events |
| **PK, PD and other evaluations** | |
| PK | Collect blood samples within 60 min pre-dose and at 30 min (±5 min), 1 h (±5 min), 2 h (±10 min), 4 h (±10 min), 8 h (±10 min), 12 h (±10 min), 24 h (±30 min) post-dose at Days 1 and 14. |
| PD | pre-dose at Days 1 (or within 7 days before the first dose), 28 and 84 |
| Target Occupancy | within 60 min pre-dose (or within 5 days before the first administration) and 4 hours (±10 min) post-dose at Day 1; and within 60 min pre-dose and 4 hours (±10 min) post-dose at Day 14 |
| Protein urine 24-hour quantification | Day 84, and as clinically indicated |
| SRI | post-dose at Days 28 and 84 |
| SLEDAI-2K | post-dose at Days 28 and 84 |
| BILAG-2004 | post-dose at Days 28 and 84 |
| PGA | post-dose at Days 28 and 84 |
| Joint evaluation | post-dose at Days 28 and 84 |

Time window (except for ultrasound thyroid and echocardiography): Day 14 ±1 day; Day 28: ±3 days; Day 56: ±3 days; Day 84: ±3 days.

### 6.2.2 End-of-Treatment Visit (within 3 days after last dose)

Regardless of the reason for early withdrawal, the investigator will arrange for the evaluation of the End-of-Treatment visit within 3 days after the last dose. For subjects who have completed the 12-week treatment according to the study protocol and have completed the evaluation of the Day 84 visit, the End-of-Treatment visit is not necessary.

**Table 5. End-of-Treatment Visit**

| **Items** | **Notes** |
| --- | --- |
| **Study Procedure Management** | |
| Concomitant medication records | Record concomitant medication |
| **Safety Evaluation** | |
| Physical examination | Physical examination |
| Vital signs | Perform vital signs measurements |
| Haematology, urinalysis, blood chemistry, electrolytes, amylase, lipase, coagulation | Perform laboratory tests on the left column |
| 5 items of thyroid function | Perform 5 items of thyroid function test |
| Urine pregnancy test | Perform urine pregnancy test |
| 12-lead ECG | Perform 12-lead ECG |
| Echocardiography | Perform echocardiography measurement, results within 5 days can be accepted. |
| Adverse event recording | Record adverse events |
| **Other Evaluations** | |
| SRI | Perform SRI-4 and SRI-6 evaluation |
| SLEDAI-2K | Perform SLEDAI-2K evaluation |
| BILAG-2004 | Perform BILAG-2004 evaluation |
| PGA | Perform PGA evaluation |
| Joint evaluation | Perform joint evaluation |
| Protein urine 24-hour quantification | Perform protein urine 24-hour quantitative determination |

### 6.2.3 Follow-up (28 days after last dose)

Subjects will be followed up on the 28 (±5) days after the last lost, and adverse events within these 28 days after the last dose will be recorded. The items to be performed during the follow-up period is as follows:

**Table 6. Items to be Performed during the Follow-up Period**

| **Items** | **Notes** |
| --- | --- |
| **Study Procedure Management** | |
| Concomitant medication records | Record concomitant medication |
| **Safety Evaluation** | |
| Physical examination | Physical examination |
| Vital signs | Perform vital signs measurements |
| Haematology, urinalysis, blood chemistry, electrolytes, amylase, lipase, coagulation | Perform laboratory tests on the left column |
| 5 items of thyroid function | Perform 5 items of thyroid function test |
| Urine pregnancy test | Perform urine pregnancy test |
| 12-lead ECG | Perform 12-lead ECG |
| Echocardiography | as clinically indicated |
| Adverse event recording | Record adverse events |

## 6.3 Unscheduled visits

Unscheduled visits refer to visits outside of the protocol plan arranged by the investigator for the safety or benefit of the subject. In this visit, information on adverse events, concomitant medications, and investigational medications since the last follow-up will be collected.

# 7 Early Termination and Withdrawal

## 7.1 Early Termination

The study may be terminated by the request of the sponsor, the investigator, or the regulatory authority. If any party requests to terminate the study prematurely, it must promptly and accurately inform the other parties, and a joint consultation in advance is necessary for the termination. If the trial needs to be terminated or suspended, the investigator should inform the Ethics Committee of the reason in accordance with the relevant regulations.

This trial may be terminated if:

- Investigators find serious safety issues;
- There are major errors in the study protocol;
- Sponsor’s decision;
- The regulatory authority decides to cancel the study;
- The sponsor reserves the right to terminate the investigation of a study center if:
  - The study center cannot enroll the agreed number of subjects within the agreed timeframe;
  - The study center seriously violates GCP;
  - The study center seriously violates protocol.

After terminating the study, all relevant records of the study should be kept for future reference.

## 7.2 Withdrawal Criteria

Reasons for discontinuation of study drug or withdrawal from the study may include but are not limited to the following:

1. The subject voluntarily withdraws the informed consent and request to withdraw from the clinical trial.
2. The subject (female) become pregnant during the study.
3. The subject is considered by the investigator to have poor compliance during the clinical trial.
4. The investigator believes that it is necessary to withdraw from the study (details of the reason for withdrawal shall be recorded).
5. The sponsor terminates the study for any safety or other special reasons.

## 7.3 Lost to Follow-up

If a subject does not return to the study center for a scheduled visit, and the staff of the study center cannot get in touch with him/her (In different time periods, the investigator have made multiple calls to the telephone number provided by the subject), it will be deemed as lost to follow up. All efforts that have been made should be recorded.

# 8 Study Evaluation

## 8.1 Safety Evaluation

Safety evaluation will include adverse events, vital signs, physical examination, laboratory test, electrocardiogram examination, echocardiography, etc.

1. AEs;
2. Vital signs: observe the temperature, blood pressure, respiration, and pulse of the subject during the different visit periods of the study;
3. Physical examination: a complete physical examination (mainly including general conditions, skin, head and neck, chest, abdomen, back, limbs and basic nervous system, etc.);
4. Laboratory tests: haematology, urinalysis, blood chemistry, electrolytes, coagulation, amylase, five items of thyroid function, thyroid ultrasound, chest X-ray, anti-dsDNA antibody, anti-Smith antibody, ANA, complement C3, C4, pregnancy test (only for female subjects of childbearing potential), HIV, HBV, HCV serology, HBV DNA (as clinically indicated), 24-hour urine protein quantification (for those with urine protein ≥1+, perform 24-hour urine protein quantitative determination as clinically indicated);
5. Echocardiography;
6. ECG:

Subjects should be in a supine position for at least 5 minutes prior to the ECG measurement. The measurement will include calculating and recording the QTc interval. The Fridericia formula will be the first choice for the QTc correction formula [QTcF = QT/(RR^0.33), RR is the standardized heart rate, obtained by dividing 60 by the heart rate]. When the heart rate is lower than 60 beats/min, the Bazetts formula can be referred to [QTcB = QT/(RR^0.5), RR is the standardized heart rate, obtained by dividing 60 by the heart rate]. Other QTc calculation formulas and methods, if having reference value, need to be discussed with the sponsor before being adopted.

During the entire study period, for the safety of the subjects, an electrocardiogram can be added at any time if necessary.

## 8.2 Adverse Events and Serious Adverse Events

### 8.2.1 Definition of Adverse Event

An Adverse Event (AE) is defined as any unfavorable and unintended sign (including an abnormal laboratory finding), symptom, or disease (new or exacerbated) temporally associated with the use of an investigational drug, whether considered related to study drug or not.

In this trial, the following events do not need to be reported as AE:

- Clinically invasive examinations themselves are not considered as adverse events, but the causes of these examinations should be regarded as adverse events.
- The daily fluctuations or manifestations of the symptoms of the existing disease do not need to be reported as an AE or SAE when there is no aggravation or deterioration after entering the clinical trial.

### 8.2.2 Definition of Serious Adverse Event

A Serious Adverse Event (SAE) is any untoward medical occurrence that, at any dose:

1. Resulted in death;
2. Is life-threatening;

NOTE: The term “life threatening” in the definition of “serious” refers to an event in which the subject is at risk of death at the time of the event. It does not refer to an event, which hypothetically might have caused death, if it were more severe.

1. Requires hospitalization or prolongation of existing hospitalization;

NOTE: In general, hospitalization signifies that the subject has been detained (usually involving at least an overnight stay) at the hospital or emergency ward for observation and/or treatment that would not have been appropriate in the physician’s office or outpatient setting. Complications that occur during hospitalization are AEs. If a complication prolongs hospitalization or fulfills any other serious criteria, the event is serious. When in doubt as to whether “hospitalization” occurred or was necessary, the AE should be considered serious.

1. Resulted in persistent or significant disability or incapacity.

NOTE: The term disability means a substantial disruption of a person’s ability to conduct normal life functions.

This definition is not intended to include experiences of relatively minor medical significance, such as uncomplicated headache, nausea, vomiting, diarrhea, influenza, and accidental trauma (eg, sprained ankle), which may interfere or prevent everyday life functions but do not constitute a substantial disruption.

1. A congenital anomaly/birth defect.
2. Is a significant medical event.

NOTE: Significant medical events may not be immediately life-threatening, cause death or hospitalization, but may endanger the subject or require medical interventions to prevent the occurrence of one of the above situations, for example, intensive treatment for allergic bronchospasm in the emergency room or at home, cachexia or convulsions not hospitalized, drug dependence or addiction, etc. Medical and scientific judgment must be used to determine whether it is a significant medical event.

**Hospitalization or prolonged hospitalization under the following circumstances will not be reported as a serious adverse event:**

- Hospitalization or prolongation of existing hospitalization due to social or administrative reasons (such as homelessness, annual medical examination, hospitalization reimbursement);
- Hospitalization caused by the protocol-required procedures during the clinical trial;
- Admitted to the hospital due to diagnosis or pre-planned surgery or medical procedure (planned before entering the study) for an existing disease, and no aggravation after signing the informed consent;
- Receiving treatment or admission in the following institutions does not constitute "hospitalization” (However, if it meets any other SAE criteria, the event must be treated as SAE and reported immediately) -- No more than 24 hours for treatment and observation in emergency department, outpatient department, and observation ward; outpatient operating room surgery, rehabilitation facilities, hospice hospitals or medical nursing homes, nursing homes, nursing or respite care centers;
- For routine treatment or monitoring of the study indication, and does not involve the aggravation of the condition.

### 8.2.3 Definition of Suspected Unexpected Serious Adverse Reaction

**Suspected Unexpected Serious Adverse Reactions (SUSARs)** refer to the suspected and unexpected serious adverse reactions whose nature and severity of clinical manifestations exceed the safety information referenced in the Investigator’s Brochure of the study drug.

### 8.2.4 Classification of Adverse Events

**8.2.4.1 Severity of Adverse Events**

The investigator is required to grade the severity of each AE.

The Division of Microbiology and Infectious Diseases (DMID) Adverse Event Severity Scale, 2007 version will be used by the investigator to evaluate each adverse event and serious adverse event reported during the trial.

For adverse events that cannot be classified according to DMID, the severity of each adverse event can be graded through the clinical description, respectively:

- Grade 1: Mild; temporary or mild discomfort (48 hours); no medical intervention/treatment required
- Grade 2: Moderate; mild to moderate activity limitation-some auxiliary support may be needed; no or little medical intervention/treatment is required
- Grade 3: Severe; significantly restricted activities, usually requires some auxiliary support; requires medical intervention/treatment, may require hospitalization
- Grade 4: Life-threatening; severely restricted activities, requiring significant auxiliary support; requiring significant medical intervention/treatment, hospitalization or hospice care

The seriousness of an adverse event should be judged based on the outcome of the subject/adverse event or the measures taken with the subject/adverse event. The severity of an adverse event is usually related to whether it threatens the life of the subject or is related to the body function, and is used to determine whether the SAE criteria is met. The severity is used to describe the degree of an event. The event itself may not have significant medical significance. Therefore, severe adverse events should not be confused with serious adverse events. Both adverse events and serious adverse events can be evaluated as severe. When an adverse event meets at least one severity standard (8.2.2), it can be judged as a serious adverse event.

**8.2.4.2 Relatedness Assessment**

The relationship between the adverse event and the study drug will be assessed according to the 5-level classification criteria of “definitely related, probably related, possibly related, possibly unrelated, and definitely unrelated". The first three levels will be aggregated as adverse drug reactions and included in the calculation of the adverse reaction rate.

Assessing the causality between adverse events and the given treatment requires a clinical decision based on all available information at the time of the case report. The assessment should be based on whether there is a rational causal relationship with the investigational treatment. Generally speaking, the investigator needs to provide facts (evidence) or basis to explain the causality. Factors that should be considered when evaluating the relationship between adverse events and investigational treatment include but are not limited to:

- Temporal sequence of administration and adverse events: The event onset time must be behind the administration.
- The time interval from drug exposure to the occurrence of the event should be evaluated in conjunction with the clinical condition at the time of the event.
- The subject's recovery after withholding the drug (de-challenge) and the recurrence after resuming the drug (re-challenge): For questionable events, from the perspective of the usual clinical situation, consider the subject's response after the withholding or after resuming the drug.
- Potential, concomitant, and intercurrent diseases: the evaluation of each event should take into account the natural history, the course of the disease being treated, and any other diseases the subject is suffering from.
- Concomitant medications or interventions: other medications or interventions received by the subject should be checked and evaluated to determine whether there is a possible causal relationship with the event.
- Pharmacology and pharmacokinetics of investigational treatments: The pharmacokinetic characteristics (absorption, distribution, metabolism, and excretion) of investigational treatments should be considered together with the pharmacodynamics in the individual subjects.

### 8.2.5 Collection & Follow-up of Adverse Events

Any abnormal symptoms, signs, or laboratory tests that occur after the subject signs the informed consent form and before first dose of the investigational drug will usually be recorded in the eCRF as a medical history/concomitant disease instead of an AE, unless the investigator determines that it is related to the medical procedure specified in the study protocol or meets the SAE criteria.

All AEs and SAEs that occur after starting the study drug until 28 days after last dose should be collected. New AEs and SAEs that occur >28 days after the last dose will no longer be recorded and followed up unless the investigator believes that they are related to the study drug.

All AEs and SAEs should be followed until resolution (return to normal or baseline), the condition have stabilized (the symptoms will not be further aggravated or improved), the event is otherwise explained, or until withdrawal of consent, whichever occurs first.

### 8.2.6 Assessment of Adverse Events

At each visit, all adverse events and serious adverse events observed or mentioned by the subject will be accurately recorded by the investigator in the source document and entered into the "Adverse Events" page of eCRF. The elements to be recorded includes but is not limited to:

- Diagnosis/description of AE;
- Start and end dates of AE;
- Change in severity grade and date;
- Whether it is SAE and seriousness standard;
- Relationship to study drug;
- Action taken with study drug;
- Outcome of AE;
- Whether the subject is withdrawn from the clinical trial due to adverse events.

### 8.2.7 Reporting and Follow-up of Abnormal Laboratory Tests

For each abnormal laboratory test result, the investigator needs to confirm whether it is an abnormal change from the baseline for the subject (for example, clinically significant). It is not necessary to make a judgment when the abnormal value is observed for the first time. In order to confirm the initial laboratory test results, the investigator can also perform re-examination or additional examination. Abnormalities in laboratory tests that are not clinically significant will not be recorded as adverse events. Any abnormal laboratory results that have clinical significance or require urgent treatment, that is, those who meet one or more of the following conditions, should be recorded as adverse events and followed up until they have resolved or stabilized.

- Accompanied by clinical symptoms;
- Leading to study drug changes (such as treatment discontinuation);
- Leading to any change in concomitant treatment (such as addition, interruption, termination, or other changes to concomitant medications or therapies).

Any abnormal laboratory result that meets the criteria for serious adverse events will be reported as SAEs, in addition to being recorded as AEs.

### 8.2.8 Reporting of Serious Adverse Events

In the event of a serious adverse event, the investigator must immediately take appropriate treatment measures to the subject. In addition to recording according to section [8.2.6](#_8.2.6_Assessment_of), the investigator should also complete the SAE report form provided or agreed by the sponsor, and report it to the sponsor within 24 hours after knowledge. The contact information of the sponsor is as follows:

| **Company** | **Contact** | **Email** |
| --- | --- | --- |
| Beijing InnoCare Pharma Tech. Co. Ltd. | Pharmacovigilance | Email: drugsafety@innocarepharma.com |

If the criteria of SUSAR is met, the investigator and the sponsor should also make corresponding reports in accordance with the respective responsibilities of the investigator and the sponsor specified in the current GCP and other applicable regulations or regulatory requirements.

### 8.2.9 Pregnancy Reporting

In order to ensure the safety of the subjects, if the partner of the male subject or the female subject becomes pregnant during the study, the subject should immediately inform the investigator. The investigator should fill in the pregnancy report form in the clinical trial and report to the sponsor within 24 hours after knowledgment, and follow up to the end of pregnancy or termination of pregnancy (natural, accidental or therapeutic abortion) or birth of the newborn, and report the outcome to the sponsor by completing the follow-up pregnancy form.

If a female subject becomes pregnant, she must be withdrawn from the study immediately, and the event should be recorded, reported, and followed up in accordance with the standard operating procedures (SOPs) of the clinical research institution; If the partner of a male subject become pregnant, the male subject is not required to withdraw from the study, but the pregnancy event of his partner needs to be handled in the same way as the pregnancy event in a female subject, that is, the event should be recorded, reported, and followed up.

If the pregnancy result meet the SAE criteria, such as ectopic pregnancy, spontaneous abortion, intrauterine fetal death, neonatal death or congenital abnormalities (which can occur in live births, terminated fetuses, intrauterine dead fetus , or dead newborns), in addition to completing the pregnancy event report form, the investigator should also follow the SAE report procedure and complete the SAE report form to report the sponsor within 24 hours after knowledgement.

## 8.3 Pharmacokinetic Evaluation

All participating subjects are required to provide PK blood samples, about 3 ml at each blood sampling time point. The blood sample will be tested in a designated laboratory. Subjects will stay fasting from 10 hours pre-dose to 4 hours post-dose at Days 1 and 14, and can be given a piece of Snickers or chocolate 2 hours post-dose. However, only PK samples from orelabrutinib-treated subjects will be measured. Please refer to the "PK Sample Collection Manual” for the specific requirements for blood sample collection, processing and storage.

**(1) sampling time points for PK samples**

Days 1 and 14: 60 min pre-dose; 30 min, 1 h, 2 h, 4 h, 8 h, 12 h, 24 h (that is, before D2 and D15 administration) post-dose. The time window for Day 14 is ±1 day.

The time window is as follows:

- 60 min pre-dose: 60 min pre-dose
- 30 min and 1 h post-dose: ±5 min
- 2 h-12 h post-dose: ±10 min
- 24 h post-dose: ±30 min

**(2) Pharmacokinetics Parameters**

Maximum concentration (Cmax); time to maximum concentration (Tmax); half-life (T1/2); area under the drug concentration-time curve (AUC); apparent clearance (CL/F); terminal apparent volume of distribution (Vz/F ); accumulation factor (R), etc.

## 8.4 Pharmacodynamic Evaluation

The PD study involves multiple testing items. If a study center is incapable to carry out a certain PD item or cannot send samples to the unit with such capabilities in time, subjects enrolled in this study center may not participate in this PD test.

Approximately 15-18 ml will be collected at each blood sampling time point. The blood sample will be tested in a designated laboratory. Please refer to the "PD Sample Collection Manual” for the specific requirements for blood sample collection and processing.

**(1) Sampling time points for PD sampls**

Days 1 (or within 7 days before the first dose), 28 and 84: pre-dose.

The time window for Days 28 and 84 is ±3 days.

**(2) PD test items**

Blood samples: total B cell count, Beffs count, Bregs count, erythrocyte sedimentation rate;

Serum samples (processed from blood samples): serum Ig levels, complement C3, complement C4, anti-dsDNA antibody, ANA, cytokines (IFN-α and IL-6).

## 8.5 Target Occupancy Evaluation

Approximately 10 ml samples will be collected at each blood sampling time point, but only PK samples from orelabrutinib-treated subjects will be measured. The blood sample will be tested in a designated laboratory. Please refer to the "BTK Sample Collection Manual” for the specific requirements for blood sample collection and processing.

**(1) Sampling time points for target occupancy samples**

- Within 60 min pre-dose (or within 5 days before the first administration) and 4 hours (±10 min) post-dose at Day 1;
- Day 14: Within 60 minutes pre-dose and 4 hours (±10 min) post-dose. The time window for Day 14 is ±1 day.

**(2) Detection of target occupancy**

The blood samples will be sent to the central laboratory to separate PBMC to detect the target occupancy rate of BTK in PBMC by orelabrutinib, which is one of the biomarkers of the efficacy of orelabrutinib.

If a study center is incapable to carry out this test and cannot send samples to the unit with such capabilities in time, subjects enrolled in this study center may not participate in this target occupancy study.

## 8.6 Efficacy Evaluation

### 8.6.1 SRI Evaluation

In this study, SRI assessment is a comprehensive index, which includes the assessment of disease activity according to three assessment systems: SLEDAI-2K, British Isles Lupus Assessment Group 2004 (BILAG 2004) and Physician Global Assessment (PGA).

SRI-4 is defined as: 1) SLEDAI-2K score decreased by ≥ 4 points from baseline; 2) No new BILAG2004 A score or no more than 1 new BILAG2004 B score; 3) PGA score deterioration from baseline <0.3 point. Satisfaction of the above three criteria indicates that the patient has an SRI response.

SRI-6 is defined as: 1) SLEDAI-2K score decreased by ≥ 6 points from baseline; 2) No new BILAG A score or no more than 1 new BILAG B score; 3) PGA score deterioration from baseline <0.3 point. Satisfaction of the above three criteria indicates that the patient has an SRI response.

### 8.6.2 SLEDAI-2K Evaluation

SLEDAI-2K is a validated SLE activity index system. This index mainly evaluates the presence of 24 clinical features across 9 organ systems (See Appendix 2). Meanwhile, the disease activity of SLE patients in the past 10 days will be measured. The index system will be weighted according to different characteristics. If at screening, a patient is found to have a certain feature in the past 10 days, the evaluating physician will score the feature. A higher score means a more severe feature. Then simply add the scores to get the total score of SLEDAI-2K, which ranges from 0 to 105.

### 8.6.3 BILAG2004 Evaluation

The BILAG2004 index is a validated global disease activity index. According to the doctor's treatment intention, it pays attention to the patient's changes in the clinical manifestations of the disease (classified by absence, improvement, unchanged, worse, or new presence) in the past 4 weeks compared with the previous 4 weeks. It covers 9 organ systems, 97 clinical signs, symptoms and laboratory parameters (see Appendix 5).

### 8.6.4 PGA Evaluation

PGA uses a visual analog scale to assess disease activity, which is a doctor’s assessment of the overall disease activity of SLE (see Appendix 6).

# 9 Statistical Considerations

For detailed statistical analysis methods, see Statistical Analysis Plan.

## 9.1 Statistical Assumption

The primary objective of this study is to evaluate the safety and tolerability of oral orelabrutinib in mild-moderate SLE patients. All statistical programming will be conducted using SAS. Descriptive statistics will be mainly used in statistical analysis.

Unless otherwise specified, all missing data will be treated as it is, without any assumptions for imputation.

## 9.2 Sample Size Estimation

This is a study to evaluate the safety, PK, PD, and PK/PD relationship of orelabrutinib in patients with mild to moderate SLE. Therefore, no formal sample size calculation has been performed. Instead, the sample size of each treatment cohort (N=15) is decided empirically. It is planned to recruit 60 subjects in this study.

## 9.3 Analysis Populations

(1) Full Analysis Set (FAS): All subjects who have taken the study drug at least once.

(2) Safety Set (SS): Subjects who have taken at least one dose of study drug and have safety measurement records.

(3) Pharmacokinetic Analysis Set (PKAS): Subjects who have taken at least one dose of the study drug after enrollment and have at least one valid PK data after administration.

(4) Pharmacodynamics Analysis Set (PDAS): Subjects who have received at least 1 week of study drug treatment and have available PD evaluation data.

## 9.4 Statistical Analysis

### 9.4.1 Safety Analysis

Safety will be assessed through summaries of adverse events, changes in laboratory results, changes in ECG, and changes in vital signs. All collected adverse event data will be listed by assigned dose level and subject No.. All treatment-emergent adverse events will be summarized in coded terms, based on severity and relationship with the investigational drug. In addition, all TESAEs, TRSAEs and TRAEs will be listed and summarized separately. The adverse events leading to drug discontinuation will also be separately listed and summarized.

The relationship between exposure and TRSAEs will be analyzed, as long as the data allows.

### 9.4.2 Pharmacokinetic Analyses

Only PK samples from orelabrutinib-treated subjects will be measured. Only subjects who have sufficient samples to fully calculate the PK parameters will be included in the data analysis. The plasma concentration of orelabrutinib will be tabulated and summarized, and individual and average plasma concentration-time curves (C-T curves) will be plotted. The standard non-compartment model analysis will be used to calculate the pharmacokinetic parameters after single-dose and multiple-dose administration. A list summary and descriptive statistical analysis of the generated PK parameters will be performed, and the arithmetic mean, standard deviation, coefficient of variation, median, maximum, minimum, geometric mean and coefficient of variation of geometric mean of each parameter will be calculated. Inter-subject variability and drug accumulation will be assessed. Additional PK analyses will be performed as appropriate.

### 9.4.3 Pharmacodynamics Analysis

Only subjects who have received at least 1 week of treatment and have baseline values and sufficient samples will be included in the data analysis so as to calculate the corresponding endpoints. All data will be tabulated and descriptively summarized and plotted by dose group and scheduled visit. For Ig levels, the measured Ig values at each scheduled visit and their changes from baseline will be summarized by dose group, including absolute change values and relative change percentages. All the other biomarkers will be presented and summarized the same way as mentioned above.

### 9.4.4 Efficacy Analyses

In this study, the analysis results of all efficacy data will be tabulated, and the distribution of each efficacy index will be descriptively summarized or plotted by dose group and scheduled visit.

# 10 Supporting Documents and Operational Considerations

## 10.1 Regulations, Ethics, and Study Supervision

### 10.1.1 Informed Consenting Process

Before a subject is enrolled in this trial, the investigator must fully introduce the purpose, procedures as well as possible risks and benefits of the clinical trial to the subject (in special circumstances, to the subject ’s legal representative); Subjects should be informed that they have the right to withdraw from the study at any time. Before enrollment, each subject must sign an informed consent form (in special cases signed by the legal representative of the subject). It is the responsibility of the investigator to obtain the informed consent form signed by both the doctor and the patient with date and contact details, before each subject enters the trial.

Any changes to the subject ’s informed consent must be submitted to the Ethics Committee for review and approval. Every patient or independent witness affected by the modification of the informed consent form, and those involved in the discussion of the informed consent form must sign and date the new version of the informed consent form. The informed consent form will be in duplicate, one copy will be kept on file at the National Drug Clinical Trial Institution and the other copy will be kept by the subject. Subjects who have not obtained informed consent or have not signed the informed consent form will not be allowed to enter the study.

### 10.1.2 Confidentiality and Privacy

All information about the health status of the subjects obtained during the study will be treated as confidential. To disclose any relevant information, a written agreement will be required.

The investigator must ensure that the identity of each subject will not be disclosed. In the eCRF and other documents submitted to the sponsor, subjects shall not be identified by their names. Instead, subjects will only be shown with the assigned enrollment number (screening number and/or randomization number) to ensure the confidentiality of all study documents. Throughout the study period, each subject will use a unique number. The investigator will keep a separate log based on the number only.

In order to comply with the government's regulatory guidelines and ensure the safety of the subjects, it is necessary for the sponsor and its representatives, the local study review committee or the Chinese competent authority to review the medical records of the subjects because they are closely related to this study. The full name of the subject can only be disclosed to the drug regulatory agency or other authorized government organization or health care official (if necessary), and the person designated by the sponsor.

Documents that will not be submitted to the sponsor (such as informed consent) will be kept by the investigator in an absolutely confidential manner, but the monitors appointed by the sponsor and the inspectors from the regulatory agency have the authority to access them. The documents that can identify the subject by name must not leave the study center, and the subject's identity will be kept confidential in all publications related to the study.

### 10.1.3 Key Role and Study Management

The sponsor will provide the study center with study-related Investigator’s Brochure and other materials and study funding, and provide the qualified investigational drugs for free as well as study materials including drug clinical trial approval documents, the sponsor’s business license, drug production license, copies of Good Manufacturing Practice (GMP) certificates, and original copy of drug inspection report, etc. The study protocol will be jointly formulated by the sponsor and the investigators and determined by both parties. The investigators will carry out this study in accordance with the study protocol and current national regulations.

The study center should keep all information provided by the sponsor strictly confidential, and other study participants and ethics committees are also required to adopt the same confidentiality measures. The information provided to the study center shall not be disclosed to others without the prior written permission from the sponsor.

### 10.1.4 Safety Supervision

The doctors and nurses of the study center will monitor the adverse events throughout the study. The subjects can get in touch with the doctor during the entire study period. During the monitoring period, the subjects will be monitored for adverse events at any time, and follow-up is required outside the monitoring period to determine whether other adverse events have occurred.

### 10.1.5 Clinical Trial Monitoring

**Study Monitoring**

The sponsor and investigators should perform their respective responsibilities, strictly follow the clinical study protocol, and follow corresponding SOPs to ensure the quality control of the clinical trial and the implementation of the quality assurance system.

The main responsibility of the monitor is to supervise the study process, to ensure that the study follows the study protocol and comply with the GCP principles, to ensure that the study records and reports are accurate and complete, and to confirm that all subjects have signed an informed consent form before entering the study. In the event of any deviation from the study protocol during the study, the monitor shall report to the sponsor in a timely manner.

**Audits and Inspections**

Regulatory authorities, ethics committees, and/or the sponsor may visit the study center to audit or inspect the study to ensure that the study process, eCRF completion, and all other reports comply with the clinical study protocol, GCP, Declaration of Helsinki, and related regulations. The monitor will perform the source data verification for the eCRF to ensure the credibility of the data. Quality control will be carried out at each stage of the study to ensure the reliability of the data and the correctness of the study process. The quality control will be carried out in accordance with the quality management operation manual of the sponsor. When the investigator receives the inspection notice from the regulatory agency, he/she must immediately inform the sponsor.

### 10.1.6 Quality Assurance and Quality Control

Before the study is officially launched, the sponsor and the investigators will discuss and formulate a clinical study protocol to ensure the quality of the study. Relevant personnel participating in the trial will be trained on GCP.

Each study center should manage investigational drugs in accordance with SOPs, including receipt, dispensation, and return.

According to the GCP guidelines, necessary steps should be taken during the design and implementation phase of the study to ensure that the collected data is accurate, consistent, complete and credible. All observed results and abnormal findings in the clinical trial should be carefully verified and recorded in time to ensure the reliability of the data. Instruments, equipment, reagents, standards, etc. to be used in each test items in the clinical trial should meet strict quality standards and can work under normal conditions.

The investigator should enter the information required by the protocol into the case report form, and the monitor will verify whether it is complete and accurate, and if necessary, guide the staff of the study center to make corrections and supplements.

The drug regulatory authority and sponsor may entrust auditors to conduct systematic inspections of clinical trial-related activities and documents to evaluate whether the trial is conducted in accordance with the protocol, SOP and relevant regulations, and whether the trial data is recorded in a timely, true, accurate and complete manner. The audit should be performed by personnel who are not directly involved in the clinical trial.

### 10.1.7 Data Handling and Record Retention

**10.1.7.1 Responsibilities of Data Collection and Management**

The trained clinical investigators will follow the study protocol and standard operating procedures, and use the original medical records to collect all pre-specified subject information in a standardized, complete and accurate manner (the original test reports should be uniformly pasted in the specified positions of the original medical records). Attention should be paid to protecting the privacy of subjects during the collection process. The investigator will review all collected data to ensure that all data are recorded in a timely, accurate and complete manner, and are responsible for the authenticity of the data. If an adverse event occurs during the study, the investigator should confirm that all adverse events are recorded in a standardized manner, and that serious adverse events are reported and recorded as required. During the study process, it should be ensured that the data and documents are stored in a safe and complete manner. After the study is completed, the data and related documents should be archived in accordance with the agreement.

This study will use the Electronic Data Capture (EDC) system to collect all study data, and the investigator has the responsibility to enter the study data into EDC in a timely and accurate manner. The sponsor’s monitor should confirm that all data records and reports are correct and complete, and all data in EDC are consistent with the source data.

**10.1.7.2 Study Record Retention**

In order to facilitate the evaluation and supervision of clinical trials by the State Food and Drug Administration and the sponsor, any study center should properly keep all relevant trial data, including documents that can confirm the identity of the subject (such as original signed informed consent form, subject identification code form and original medical record), investigational drug dispensation / return records, etc. All study documents should be kept until 5 years after the end of this clinical study. All data generated in this clinical study are the sole and exclusive property of the sponsor and should not be made available in any form to third parties without written permission from the sponsor (except for National or Local Food & Drug Administration). After the study is completed, the participating study centers have the right to publish the relevant elements of the study in the form of a paper and declare achievement, but the written permission from the sponsor is required before the paper is submitted for publication. Each study center should not publish articles or declare achievements before the overall study results have been published.

### 10.1.8 Protocol Deviations

The study protocol must be strictly implemented after being discussed and agreed by the sponsor and investigator, and approved by the ethics committee. Any intentional or unintentional deviation or violation of the study protocol and GCP principles, can be classified as a deviation from the protocol or a violation of the protocol. During the monitoring process, if the monitor finds a deviation from the protocol, the investigator or monitor should complete the record of the violation of the protocol, and record the time of the detailed discovery, the time and process of the incident, the reason, and the corresponding measures, which shall be signed by the investigator and notified to the ethics committee and the sponsor.

### 10.1.9 Study Publication and Data Sharing Policy

Regarding the publication of the results of this study, whether part or all, should be approved by Beijing InnoCare Pharma Tech. Co. Ltd.. Without the consent of Beijing InnoCare Pharma Tech. Co. Ltd., investigators are not allowed to publish any relevant study data or information.

Beijing InnoCare Pharma Tech. Co. Ltd. and the monitors can view the data for the purpose of inspection. When relevant personnel who are not directly involved in the study need to audit the data or the drug regulatory authority to inspect the data, the study center shall provide the data in a timely manner.

## 10.2 List of Abbreviations

| **Abbr.** | **Full Name in English** | **Full Name in Chinese** |
| --- | --- | --- |
| ACR | American College of Rheumatdogy | 美国风湿病学会 |
| AE | Adverse Event | 不良事件 |
| ALB | Albumin | 白蛋白 |
| ALT | Alanine Aminotransferase | 谷丙转氨酶 |
| AMS | Amylase | 淀粉酶 |
| AMY | Amylase | 淀粉酶 |
| ANA | Antinuclear Antibody | 抗核抗体 |
| ANC | Absolute Value of Neutrophil Count | 中性粒细胞计数绝对值 |
| APTT | Activated Partial Thromboplastin Time | 部分凝血活酶时间 |
| AST | Aspartate Aminotransferase | 谷草转氨酶 |
| AUC | Area Under the Curve | 浓度时间曲线下面积 |
| BCR | B-Cell Receptor | B细胞受体 |
| Beffs | Effector B Cells | 效应B细胞 |
| BID | Twice A Day | 每天两次 |
| BLys | B Lymphocyte Stimulator | B淋巴细胞刺激因子 |
| Bregs | Regulatory B Cells | 调节性B细胞 |
| BTK | Bruton’S Tyrosine Kinase | 布鲁顿酪氨酸激酶 |
| BUN | Blood Urea Nitrogen | 血尿素氮 |
| CIA | Collagen-Induced Arthritis | 胶原诱导性关节炎 |
| CL | Clearance | 清除率 |
| Cmax | Maximum Concentration | 峰浓度 |
| Cmin | Minimum Concentration | 谷浓度 |
| CNS | Central Nervous System | 中枢神经系统 |
| Cr | Creatinine | 肌酐 |
| CYP | Cytochrome P450 | 细胞色素P450 |
| DBIL | Direct Bilirubin | 直接胆红素 |
| DLBCL | Diffuse Large B Cell Lymphoma | 弥漫性大B细胞淋巴瘤 |
| DLT | Dose-Limiting Toxicities | 剂量限制性毒性 |
| DMID | Division of Microbiology And Infectious Diseases | 微生物和传染病研究所 |
| DNA | Deoxyribonucleic Acid | 脱氧核糖核酸 |
| dsDNA | Double-Stranded DNA | 双链脱氧核糖核酸 |
| eCRF | Electronic Case Report Form | 电子病历报告表 |
| ECG | Electrocardiogram | 心电图 |
| ECOG | Eastern Cooperative Oncology Group | 美国东部肿瘤协作组 |
| EDC | Electronic Data Capture | 电子数据捕获 |
| EGFR | Epidermal Growth Factor Receptor | 表皮生长因子受体 |
| FAS | Full Analysis Set | 全分析集 |
| FDA | Food and Drug Administration | 食品药品监督管理局 |
| FT3 | Free Triiodothyronine | 游离三碘甲状腺原氨酸 |
| FT4 | Free Tetraiodothyronine | 游离四碘甲状腺原氨酸 |
| GCP | Good Clinical Practice | 临床研究质量管理规范 |
| GGT | Glutamyl Transpeptidase | 谷酰胺转肽酶 |
| Glu | Glucose | 葡萄糖 |
| GMP | Good Manufacturing Practice | 药品生产质量管理规范 |
| G-CSF | Granulocyte Colony Stimulating Factor | 粒细胞集落刺激因子 |
| Hb | Hemoglobin | 血红蛋白 |
| HBcAb | Hepatitis B Core Antibody | 乙肝核心抗体 |
| HBsAg | Hepatitis B Surface Antigen | 乙肝表面抗原 |
| HBV | Hepatitis B Virus | 乙型肝炎病毒 |
| HCV | Hepatitis C Virus | 丙型肝炎病毒 |
| hERG | Human *Ether-À-Go-Go* Related Gene | 人类果蝇相关基因 |
| HIV | Human Immunodeficiency Virus | 人类免疫缺陷病毒 |
| IB | Investigator’S Brochure | 研究者手册 |
| IC50 | Concentration Inhibiting 50% of an Assay Response | 半数抑制率 |
| ICH | International Conference on Harmonization | 人用药品注册技术要求国际协调会 |
| ICSR | Individual Case Safety Report | 个例安全性报告 |
| IFN-α | Interferon-Α | α-干扰素 |
| Ig | Immunoglobulin | 免疫球蛋白 |
| IL-6 | Interleukin 6 | 白介素6 |
| INR | International Normalized Ratio | 国际标准化比率 |
| LDH | Lactate Dehydrogenase | 乳酸脱氢酶 |
| LOAEL | Lowest Observed Adverse Effect Level | 最低观察到的有害作用剂量 |
| LPS | Lipase | 脂肪酶 |
| LVEF | Left Ventricular Ejection Fractions | 左心射血分数 |
| MTD | Maximum Tolerated Dose | 最大耐受剂量 |
| NCI | National Cancer Institute | 国家癌症中心 |
| NOAEL | No Observed Adverse Effect Level | 未观察到有害作用剂量 |
| NPSLE | Neuropsychiatric Systemic Lupus Erythematosus | 神经精神狼疮 |
| NSAID | Nonsteroidal Anti-Inflammatory Drugs | 非甾体抗炎药 |
| NYHA | New York Heart Association | 纽约心脏病协会 |
| PBMC | Peripheral Blood Mononuclear Cell | 外周血单个核细胞 |
| PCR | Polymerase Chain Reaction | 多聚酶链式反应 |
| PD | Pharmacodynamics | 药效学 |
| PDAS | Pharmacodynamics Analysis Set | 药效学分析集 |
| PK | Pharmacokinetic | 药代动力学 |
| PKAS | Pharmacokinetic Analysis Set | 药代动力学分析集 |
| PPS | Per Protocol Set | 符合方案集 |
| PT | Prothrombin Time | 凝血原酶时间 |
| QD | Once Daily | 每天一次 |
| RBC | Red Blood Cell | 红细胞 |
| SAE | Serious Adverse Event | 严重不良事件 |
| SAS | Statistical Analysis System | 统计分析系统 |
| SLE | Systemic Lupus Erythematosus | 系统性红斑狼疮 |
| SLEDAI | Systemic Lupus Erythematosus Disease Activity Index | 系统性红斑狼疮疾病活动性指数 |
| SLICC | Systemic Lupus International Collaborating Clinics | 系统性狼疮国际临床合作组 |
| SOP | Standard Operating Procedure | 标准操作规程 |
| SRI | SLE Responder Index | SLE反应指数 |
| SS | Safety Set | 安全数据集 |
| SUSAR | Suspected Unexcepted Serious Adverse Reaction | 可疑非预期严重不良反应 |
| TBIL | Total Bilirubin | 总胆红素 |
| TC | Total Cholesterol | 总胆固醇 |
| TEAE | Treatment Emergent Adverse Events | 治疗期间出现的不良事件 |
| TESAE | Treatment Emergent Serious Adverse Events | 治疗期间出现的严重不良事件 |
| TG | Triglyceride | 甘油三酯 |
| TRAE | Treatment-Related Adverse Events | 与治疗有关的不良事件 |
| TRSAE | Treatment-Related Serious Adverse Events | 与治疗有关的严重不良事件 |
| TSH | Thyroid Stimulating Hormone | 促甲状腺激素 |
| ULN | Upper Limit of Normal | 正常值上限 |
| WBC | White Blood Cell | 白细胞 |

## 10.3 Amendment History

- After this protocol is approved by the ethics committee, any modification to it needs to formulate a modification description, which shall be signed by the principal investigator. The protocol can be modified only after the sponsor agrees.
- The modified protocol must be reviewed or filed by the ethics committee before it can be executed.
- Amendment history as follows:

| **Protocol No.** | **Version No.** | **Version Date** |
| --- | --- | --- |
| ICP-CL-00109 | V1.0 | July 2, 2019 |
| ICP-CL-00109 | V2.0 | September 10, 2019 |
| ICP-CL-00109 | V3.0 | June 16, 2020 |
| ICP-CL-00109 | V4.0 | August 5, 2020 |
| ICP-CL-00109 | V5.0 | January 7, 2021 |
| **Major changes from v4.0 to v5.0:**   1. Updated the version number and version date. 2. ICP-022 was updated to orelabrutinib (except for study name). Orelabrutinib is a generic name which has been certified by the National Pharmacopoeia Commission. 3. Added exploratory endpoint(s) for efficacy. 4. Inclusion Criteria #4: The total score of SLEDAI was changed to 5~12. 5. Inclusion criteria #5: Newly added immunomodulators for standard treatment of moderate SLE: cyclosporine, leflunomide, tacrolimus, sirolimus, mizoribine, 6-mercaptopurine, Iguratimod or thalidomide. 6. Deleted the original inclusion criterion #7 due to the overlap with exclusion criterion #2. 7. Newly added the exclusion criteria #5, #10, #11, #13, #14, #15, #18, and #19. For details, see section 4.2 of the main body. 8. Exclusion criterion #4: added the clinical manifestations of NPSLE. 9. Exclusion criterion #9: The time window was changed to 28 days prior to randomization. 10. Due to the overlap with the newly added criterion #10, the original exclusion criterion was deleted: within 3 months before screening or during screening: start to use methotrexate, mycophenolic acid (mycophenolate mofetil or sodium mycophenolate), or azathioprine, hydroxychloroquine sulfate, or change its dose. 11. Due to the overlap with the newly added criterion #10, the original exclusion criterion was deleted: within 3 months before screening or during screening: use cyclosporine, tacrolimus, leflunomide, abatacept, intravenous immunoglobulin, plasma exchange, or other immunosuppressive agents/modulators. 12. Exclusion criterion #12: The time window was changed to 6 months prior to randomization. Deleted rituximab, belimumab, or any other treatments that deplete or regulate B cells from the list of drugs that were not allowed. 13. The time window for pre-dose PK and BTK blood sampling was extended to within 60 minutes. 14. Simplified the study schedule. 15. Perform haematology, urinalysis, blood chemistry, coagulation and other laboratory tests at D1, and the results within 5 days before the first medication can be accepted.   **Major changes from v3.0 to v4.0:**   1. Updated the version number and version date. 2. Added the reason and basis for the exclusion criteria of "Hemoglobin (Hb) <100.0g/L" changed to "Hemoglobin <90g/L" in the protocol amendment v2.0-v3.0; and the basis for modifying the cut-off value after converting the evaluation measurement of "creatinine clearance ≤40ml/min". 3. A note was added to Criterion #11 on page 17: “Subjects can continue to receive treatment until they meet the criteria for termination or discontinuation of treatment prescribed by the study protocol”, which clarifies that such subjects can continue to receive study drug treatment.   **Major changes from v2.0 to v3.0:**   1. Updated the version number and version date. 2. The study schedule was adjusted according to the new study protocol, and the acceptable time window of some test items was adjusted to ensure clinical operability. 3. SLICC was deleted in Inclusion Criteria #3, and a unified ACR diagnostic standard was adopted; modified the language in the Exclusion Criteria # 10, 12, 13, 19, 21, and 22 to make it clearer; The exclusion criteria #14, 15, 24, and 25 were combined into the requirements on organ function. The creatinine clearance rate was replaced by the glomerular filtration rate (MDRD) to meet clinical practice. 4. The evaluation endpoint of SLEDIA-2K score was added to the secondary endpoint. 5. In the bullet Pharmacodynamics under section 2.2.2 Secondary Endpoints, the test item Ig was described more clearly. 6. The definition of dose-limiting toxicity in Section 3.3 that was not applicable to this study was removed. 7. Dose modification rules in Section 5.1.3 gave clearer guidance based on the updated DMID2007 grading criteria. 8. In the visit measurements in Sections 6.1 and 6.2, added height, weight, chest X-ray, and evaluation items as indicated by the BILAG2004 criteria, and ECOG scores that should not be used in this study were deleted. More clarified the requirements for pregnancy test. Adjusted the testing time of some test items to ensure clinical operability and necessity. 9. Updated section 8.2 according to the new GCP requirements. The severity of AE was described according to the DMID2007 version. 10. The efficacy evaluation measurements were described in detail in section 8.6, and revised the corresponding appendix. 11. Deleted unnecessary SLICC criteria, ECOG score, Cockcroft-Gault formula and SELENA-SLEDAI evaluation in the appendix. Refined the Chinese translation of SLEDAI-2K and added the BILAG2004 evaluation scale to ensure the accuracy of the evaluation basis. 12. The exclusion criterion "Hemoglobin (Hb) <100.0g/L" was changed to "Hemoglobin <90g/L". According to the existing toxicity and safety data of orelabrutinib from preclinical studies and clinical studies in healthy volunteers and patients with hematological tumor, it is safe for patients with hemoglobin ≥90 g/L to receive orelabrutinib treatment, and the modification of this criterion also meets the inclusion/exclusion requirements of patients enrolled in routine SLE clinical trials. 13. The exclusion criterion “creatinine clearance ≤40ml/min” was converted to another evaluation measurement of “estimated glomerular filtration rate < 30 ml/min/1.73m2 from the Modification of Diet in Renal Disease (MDRD) formula”. According to the existing toxicity and safety data of orelabrutinib from preclinical studies and clinical studies in healthy volunteers and patients with hematological tumor, it is safe for patients with glomerular filtration rate ≥30ml/mi/1.73 m2 to receive orelabrutinib treatment. The glomerular filtration rate estimated according to the MDRD formula can more accurately reflect the renal function than the creatinine clearance rate, and the SLE activity score on renal function in the study also uses this measurement, therefore, the modification ensures consistency with the evaluation criteria of renal function in the trial.   **Major changes from v1.0 to v2.0:**   - - 1. Updated the version number and version date.     2. All abbreviations in this document had their full English names added when they first appeared in this document; abbreviations that appeared only once were deleted.     3. Changes to the study design: the original 4-week main study + 20-week follow-up study design was changed to the overall 12-week study, no longer divided into two stages.     4. The study schedule was adjusted according to the new study protocol, and the original study schedule, i.e. Table 2 was deleted.     5. The language in the Inclusion Criteria #5 and the Exclusion Criteria #23 & #24 were reworded to make it clearer.     6. Changes in the collection time of PD samples and BTK samples.     7. In Section 1.1, the expression of some sentences was modified to make the expression more accurate and clearer. Deleted some sentences that were irrelevant to this study and refined the introduction of BTK.   In Section 1.2.2, the details of the Phase I study of the study drug (orelabrutinib) were added (number of subjects, race, time of multiple administration, etc.), and the clinical study progress and safety information of other BTK inhibitors were supplemented. | | |

# 11 Literature References

Overview of pharmacodynamics of ibrutinib: <https://www.accessdata.fda.gov/drugsatfda_docs/nda/2014/205552Orig2s000PharmR.pdf>

Advani, R. H., Buggy, J. J., Sharman, J. P., Smith, S. M., Boyd, T. E., Grant, B., Kolibaba, K. S., Furman, R. R., Rodriguez, S., Chang, B. Y.*, et al.* (2013). Bruton tyrosine kinase inhibitor ibrutinib (PCI-32765) has significant activity in patients with relapsed/refractory B-cell malignancies. Journal of clinical oncology : official journal of the American Society of Clinical Oncology *31*, 88-94.

Chan, O., and Shlomchik, M. J. (1998). A new role for B cells in systemic autoimmunity: B cells promote spontaneous T cell activation in MRL-lpr/lpr mice. Journal of immunology (Baltimore, Md : 1950) *160*, 51-59.

Choi, J., Kim, S. T., and Craft, J. (2012). The pathogenesis of systemic lupus erythematosus-an update. Current opinion in immunology *24*, 651-657.

Erickson, R. I., Schutt, L. K., Tarrant, J. M., McDowell, M., Liu, L., Johnson, A. R., Lewin-Koh, S. C., Hedehus, M., Ross, J., Carano, R. A.*, et al.* (2017). Bruton's Tyrosine Kinase Small Molecule Inhibitors Induce a Distinct Pancreatic Toxicity in Rats. The Journal of pharmacology and experimental therapeutics *360*, 226-238.

Gao, W., Wang, M., Wang, L., Lu, H., Wu, S., Dai, B., Ou, Z., Zhang, L., Heymach, J. V., Gold, K. A.*, et al.* (2014). Selective antitumor activity of ibrutinib in EGFR-mutant non-small cell lung cancer cells. Journal of the National Cancer Institute *106*.

Harandi, A., Zaidi, A. S., Stocker, A. M., and Laber, D. A. (2009). Clinical Efficacy and Toxicity of Anti-EGFR Therapy in Common Cancers. Journal of oncology *2009*, 567486.

Holroyd, C. R., and Edwards, C. J. (2009). The effects of hormone replacement therapy on autoimmune disease: rheumatoid arthritis and systemic lupus erythematosus. Climacteric : the journal of the International Menopause Society *12*, 378-386.

Johnson, S., et al. (1993). The effects on rat thyroid function of an hepatic microsomal enzyme inducer. Hum Exp Toxicol 12(2): 153-158.

Kil, L. P., de Bruijn, M. J., van Nimwegen, M., Corneth, O. B., van Hamburg, J. P., Dingjan, G. M., Thaiss, F., Rimmelzwaan, G. F., Elewaut, D., Delsing, D.*, et al.* (2012). Btk levels set the threshold for B-cell activation and negative selection of autoreactive B cells in mice. Blood *119*, 3744-3756.

Maas, A., and Hendriks, R. W. (2001). Role of Bruton's tyrosine kinase in B cell development. Developmental immunology *8*, 171-181.

McMullen, J. R., Boey, E. J. H., Ooi, J. Y. Y., Seymour, J. F., Keating, M. J., and Tam, C. S. (2014). Ibrutinib increases the risk of atrial fibrillation, potentially through inhibition of cardiac PI3K-Akt signaling.  *124*, 3829-3830.

Satterthwaite, A. B., and Witte, O. N. (2000). The role of Bruton's tyrosine kinase in B-cell development and function: a genetic perspective. Immunological reviews *175*, 120-127.

Shlomchik, M. J., Madaio, M. P., Ni, D., Trounstein, M., and Huszar, D. (1994). The role of B cells in lpr/lpr-induced autoimmunity. The Journal of experimental medicine *180*, 1295-1306.

Smith, M. R. (2015). Ibrutinib in B lymphoid malignancies. Expert opinion on pharmacotherapy *16*, 1879-1887.

Smith, P. F., et al. (1991). Studies on the mechanism of simvastatin-induced thyroid hypertrophy and follicular cell adenoma in the rat. Toxicol Pathol 19(3): 197-205.

Tucker, D. L., and Rule, S. A. (2015). A critical appraisal of ibrutinib in the treatment of mantle cell lymphoma and chronic lymphocytic leukemia. Therapeutics and clinical risk management *11*, 979-990.

Wang, M. L., Rule, S., Martin, P., Goy, A., Auer, R., Kahl, B. S., Jurczak, W., Advani, R. H., Romaguera, J. E., Williams, M. E.*, et al.* (2013). Targeting BTK with Ibrutinib in Relapsed or Refractory Mantle-Cell Lymphoma.  *369*, 507-516.

Zabka, T. S., et al. (2011). Characterization of xenobiotic-induced hepatocellular enzyme induction in rats: anticipated thyroid effects and unique pituitary gland findings. Toxicol Pathol 39(4): 664-677.
