# Supplementary material for: Orelabrutinib, an irreversible inhibitor of Bruton’s tyrosine kinase, for the treatment of systemic lupus erythematosus: a randomised, double-blind, placebo-controlled, phase Ib/IIa study
Source: Research Square preprint supplement (doi:10.21203/rs.3.rs-7058001/v1), 2025-07-23
Supplement: Supplementary file 2 [file 88f3d051eca8ccded9daba55.docx]

**Statistical Analysis Plan**

Li R, Li X, Zhu X, et al. Orelabrutinib for Systemic Lupus Erythematosus: A Randomized, Double-Blind, Placebo-Controlled Study

This supplementary material was provided by the authors to give readers further details on their article. The material was reviewed but not copyedited.

Beijing InnoCare Pharma Technology Co., Ltd.

Protocol No.: ICP-CL-00109

A Phase Ib/IIa, Randomized, Double-Blind, Placebo-Controlled, Dose-Ranging Study to Evaluate the Safety, Tolerability, Pharmacokinetics (PK), Pharmacodynamics (PD), and PK/PD of ICP-022 in Patients with Mild to Moderate Systemic Lupus Erythematosus

Statistical Analysis Plan

**Version: Final V1.0**

**Date: 24-FEB-2022**

**Author: Fan An**

REVISION HISTORY

| **Version** | **Date** | **Author** | **Changes from Previous Version** |
| --- | --- | --- | --- |
|  |  |  |  |
|  |  |  |  |
|  |  |  |  |
|  |  |  |  |
|  |  |  |  |

Signature Page

| Study Title: | A Phase Ib/IIa, Randomized, Double-Blind, Placebo-Controlled, Dose-Ranging Study to Evaluate the Safety, Tolerability, Pharmacokinetics (PK), Pharmacodynamics (PD), and PK/PD of ICP-022 in Patients with Mild to Moderate Systemic Lupus Erythematosus |
| --- | --- |
| Protocol ID: | ICP-CL-00109 |
| Statement:  I, the undersigned, have carefully read this Statistical Analysis Plan and agree to conduct statistical analyses on the data of this clinical study in accordance with the plan. | |

|  |  |  |
| --- | --- | --- |
|  |
| Author: Fan An  Senior Biostatistician  GCP ClinPlus Co., Ltd. |  | Date |
|  |  |  |
|  |
| Reviewer: Li Juan  Director, Biostatistics  GCP ClinPlus Co., Ltd. |  | Date |
|  |  |  |
|  |
| Reviewer: Li Sichen  Biostatistician  Beijing InnoCare Pharma Technology Co., Ltd. |  | Date |

Table of Contents

[List of Abbreviations 7](#_Toc164758074)

[1. Introduction 10](#_Toc164758075)

[1.1. Purpose of Statistical Analysis Plan 10](#_Toc164758076)

[1.2. Responsibilities 10](#_Toc164758077)

[1.3. Time of Analysis 10](#_Toc164758078)

[2. Objectives 11](#_Toc164758079)

[2.1. Primary Objective 11](#_Toc164758080)

[2.2. Secondary Objectives 11](#_Toc164758081)

[3. Study Overview 11](#_Toc164758082)

[3.1. Study Design 11](#_Toc164758083)

[3.2. Determination of Sample Size 12](#_Toc164758084)

[3.3. Randomization and Blinding 12](#_Toc164758085)

[3.4. Study Drug and Administration 12](#_Toc164758086)

[3.4.1. Basic Information about Study Drug 12](#_Toc164758087)

[3.4.2. Dosage and Administration 13](#_Toc164758088)

[3.5. Schedules of Activities 14](#_Toc164758089)

[4. Evaluation Variables 19](#_Toc164758090)

[4.1. Primary Endpoints 19](#_Toc164758091)

[4.2. Secondary Endpoints 19](#_Toc164758092)

[4.2.1. Target Occupancy 19](#_Toc164758093)

[4.2.2. Pharmacodynamics 19](#_Toc164758094)

[4.2.3. Pharmacokinetics 20](#_Toc164758095)

[4.2.4. Efficacy 20](#_Toc164758096)

[5. Analysis Datasets 21](#_Toc164758097)

[5.1. Full Analysis Set 21](#_Toc164758098)

[5.2. Per-Protocol Set 21](#_Toc164758099)

[5.3. Safety Set 21](#_Toc164758100)

[5.4. PK Concentration Set 21](#_Toc164758101)

[5.5. PK Parameter Set 21](#_Toc164758102)

[5.6. Pharmacodynamic Analysis Set 21](#_Toc164758103)

[6. Methods of Statistical Analysis 22](#_Toc164758104)

[6.1. General Considerations for Statistical Analysis 22](#_Toc164758105)

[6.1.1. General Principle 22](#_Toc164758106)

[6.1.2. Baseline Value 23](#_Toc164758107)

[6.1.3. Handling of Missing Values 23](#_Toc164758108)

[6.1.3.1. Handling of missing date 23](#_Toc164758109)

[6.1.4. Derived Variables 24](#_Toc164758110)

[6.2. Subject Characteristics 24](#_Toc164758111)

[6.2.1. Subject Disposition 24](#_Toc164758112)

[6.2.2. Protocol Deviations 25](#_Toc164758113)

[6.2.3. Demographics and Baseline Characteristics 25](#_Toc164758114)

[6.2.3.1. Demographic 25](#_Toc164758115)

[6.2.3.2. Other Baseline Characteristics 25](#_Toc164758116)

[6.2.4. Medical History 27](#_Toc164758117)

[6.2.5. Prior/Concomitant Therapies 27](#_Toc164758118)

[6.2.5.1. Prior/concomitant medications/standard therapies for SLE 27](#_Toc164758119)

[6.2.5.2. Prior/concomitant non-drug therapies 29](#_Toc164758120)

[6.2.6. Drug Exposure and Treatment Compliance 29](#_Toc164758121)

[6.3. Safety Evaluation 30](#_Toc164758122)

[6.3.1. Adverse Events 30](#_Toc164758123)

[6.3.1.1. Summary table of all AEs 31](#_Toc164758124)

[6.3.1.2. Summary of TEAEs and TESAEs by SOC and PT 31](#_Toc164758125)

[6.3.1.3. Summary of TRAES and TRSAES by SOC and PT 31](#_Toc164758126)

[6.3.1.4. Summary of TEAEs and TESAEs by SOC/PT and DMID grade 32](#_Toc164758127)

[6.3.1.5. TEAEs and TRAEs leading to drug interruption or drug discontinuation 32](#_Toc164758128)

[6.3.1.6. TESAEs and TRSAEs leading to death 32](#_Toc164758129)

[6.3.2. Summary of Deaths 32](#_Toc164758130)

[6.3.3. Laboratory Tests 32](#_Toc164758131)

[6.3.4. Vital Signs 34](#_Toc164758132)

[6.3.5. Physical Examination 34](#_Toc164758133)

[6.3.6. 12-Lead ECG 34](#_Toc164758134)

[6.3.7. Echocardiography 35](#_Toc164758135)

[6.3.8. Pregnancy Test 35](#_Toc164758136)

[6.4. Efficacy Evaluation 35](#_Toc164758137)

[6.5. Pharmacokinetic Evaluation 38](#_Toc164758138)

[6.5.1. Collection and Disposition of PK Samples 38](#_Toc164758139)

[6.5.2. Data Handling Instructions 38](#_Toc164758140)

[6.5.2.1. Treatment of plasma drug concentrations below the lower limit of quantification 38](#_Toc164758141)

[6.5.2.2. Handling of Missing Values and Outliers 39](#_Toc164758142)

[6.5.3. PK Parameter Calculation 39](#_Toc164758143)

[6.5.4. PK Statistical Analysis 41](#_Toc164758144)

[6.5.4.1. Analysis of PK concentration data 41](#_Toc164758145)

[6.5.4.2. PK Parameter Analysis 42](#_Toc164758146)

[6.6. Pharmacodynamic Evaluation 43](#_Toc164758147)

[6.7. Target Occupancy Assessment 44](#_Toc164758148)

[6.7.1. Collection and Disposition of Samples for Target Occupancy Assay 44](#_Toc164758149)

[6.7.2. Target Occupancy Analysis 44](#_Toc164758150)

[7. Interim Analysis 45](#_Toc164758151)

[8. Changes Relative to Planned Analyses in the Protocol 45](#_Toc164758152)

[9. Statistical Analysis Tables/Listings/Figures (TLFs) 45](#_Toc164758153)

List of Abbreviations

| **Abbreviations** | **Definition** |
| --- | --- |
| AE | Adverse Events |
| ALB | Albumin |
| ALT | Alanine Transaminase |
| AMY | Amylase |
| ANA | Antinuclear Antibody |
| APTT | Activated Partial Thromboplastin Time |
| AST | Glutamic-oxaloacetic Transferase |
| ATC | Anatomical Therapeutic Chemical Classification |
| AUC | Area Under the Plasma Concentration-Time Curve |
| BCR | B-Cell Antigen Receptor |
| Beffs | Effector B Cells |
| BMI | Body Mass Index |
| BQL | Below Lower Limit of Quantification |
| Bregs | Regulatory B Cells |
| BTK | Cl/F |
| BUN | Blood Urea Nitrogen |
| CL/F | Apparent Clearance |
| CM | Concomitant Medication |
| Cmax | Peak Concentration |
| Cr | Creatinine |
| CRF | Case Report Form |
| CSR | Clinical Study Report |
| DBIL | Direct Bilirubin |
| DF | Degree of Fluctuation |
| DMID | The Division of Microbiology and Infectious Diseases |
| DNA | Deoxyribonucleic Acid |
| ECG | Electrocardiogram |
| eCRF | Electronic Case Report Form |
| EDC | Electronic Data Capture System |
| FAS | Full Analysis Set |
| FT3 | Free Triiodothyronine |
| FT4 | Free Tetraiodothyronine |
| Glu | Glucose |
| Hb | Haemoglobin |
| HBcAb | Anti Hepatitis B Core |
| HBsAg | Hepatitis B Virus Surface Antigen |
| HBV | Hepatitis B Virus |
| HCG | Human Chorionic Gonadotropin |
| HCV | Hepatitis C Virus |
| HIV | Human Immunodeficiency Virus |
| ICF | Informed Consent Form |
| Ig | Immunoglobulins |
| INR | International Normalized Ratio |
| IWRS | Interactive Web Response System |
| LDH | Lactate Dehydrogenase |
| LEVF | Left Ventricular Ejection Fractions |
| LPS | Lipase |
| Max | Maximum |
| MedDRA | Medical Dictionary for Regulatory Activities |
| Min | Minimum |
| NA | Not Available |
| NC | Not Calculated |
| NCA | Noncompartmental Analysis |
| ND | Not Determined |
| NE | Not Evaluable |
| NMPA | National Medical Products Administration |
| NR | No Reading |
| PD | Pharmacodynamics |
| PDAS | Pharmacodynamic Analysis Set |
| PK | Pharmacokinetics |
| PKCS | Pk Concentration Set |
| PKPS | Pk Parameter Set |
| PT | Prothrombin Time |
| PT | Preferred Term |
| Q1 | Lower Quartile |
| Q3 | Upper Quartile |
| QD | Quaque Die/Daily |
| QTc | Qt Corrected for Heart Rate |
| RBC | Red Blood Cell |
| SAE | Serious Adverse Event |
| SAP | Statistical Analysis Plan |
| SAS | Statistical Analysis System |
| SD | Standard Deviation |
| SLE | Systemic Lupus Erythematosus |
| SLEDAI | Systemic Lupus Erythematosus Disease Activity Index |
| SOC | System Organ Class |
| SOP | Standard Operating Procedure |
| SRI | SLE Responder Index |
| SS | Safety Set |
| T1/2 | Elimination Half-Life |
| TBIL | Total Bilirubin |
| TC | Total Cholesterol |
| TEAE | Treatment‑Emergent Adverse Event |
| TESAE | Treatment-Emergent Serious Adverse Event |
| TG | Triglyceride |
| Tmax | Time To Maximum Concentration |
| TRAE | Treatment-Related Adverse Event |
| TRSAE | Treatment-Related Serious Adverse Event |
| TSH | Thyrotropin |
| TT3 | Total Triiodothyronine |
| TT4 | Total Thyroxine |
| UGLU | Urine Glucose |
| ULN | Upper Limit of Normal |
| Vz/F | Terminal Apparent Volume of Distribution |
| WBC | Leukocytes (WBC) |
| WHO | World Health Organization |
| WHODrug | World Health Organization Drug Dictionary |
| λz | Elimination Rate Constant |

# 1. Introduction

## 1.1. Purpose of Statistical Analysis Plan

This Statistical Analysis Plan (SAP) is a document delineating statistical analysis that was written based on Protocol ICP-CL-00109, Version V5.0, dated 07 Jan 2021, to assess the safety, tolerability, pharmacokinetics (PK), pharmacodynamics (PD), and PK/PD of ICP-022 in patients with mild to moderate systemic lupus erythematosus (SLE), and on the electronic Case Report Form (eCRF), Version 3.0, dated 08 Apr 2021. The purpose of this document is to ensure that the statistical methods used for the tables, figures and listings to be generated are complete and appropriate. This SAP will be submitted to the National Medical Products Administration (NMPA) or other regulatory authorities as part of the registration dossier. Any descriptive or unscheduled analysis that is not specified in the SAP but included in the Clinical Study Report (CSR) will be clearly described in the CSR.

## 1.2. Responsibilities

GCP ClinPlus Co., Ltd will perform statistical analyses and be responsible for the generation and quality control of all tables, figures and listings.

## 1.3. Time of Analysis

The SAP will be finalized prior to database lock, and all statistical analyses specified in the SAP will be started after all subjects have completed the study and the database is locked.

# 2. Objectives

## 2.1. Primary Objective

**•** To evaluate the safety and tolerability of oral Orelabrutinib in patients with mild to moderate SLE.

## 2.2. Secondary Objectives

**•** To evaluate the pharmacokinetics (PK) of oral Orelabrutinib in patients with mild to moderate SLE;

**•** To evaluate the pharmacodynamics (PD) of oral Orelabrutinib in patients with mild to moderate SLE;

**•** To evaluate the PK/PD relationship of oral Orelabrutinib in patients with mild to moderate SLE;

**•** To evaluate the efficacy of oral Orelabrutinib in patients with mild to moderate SLE.

# 3. Study Overview

## 3.1. Study Design

Overall Study Design:

This study is designed as a randomized, double-blind, placebo-controlled trial. It consists of a screening period (not more than 28 days from the signing of the Informed Consent Form to the first dose of the investigational product), a treatment period (12 weeks after the first dose of the investigational product), and a follow-up period (28 days after the last dose).

All subjects enrolled in this study should be receiving standard of care with placebo (n=15) or Orelabrutinib (n=45) at doses of 50 mg (n=15), 80 mg (n=15), and 100 mg (n=15), respectively. The study drug is administered orally, once daily for a total of 12 weeks. The overall study design schema is as follows:


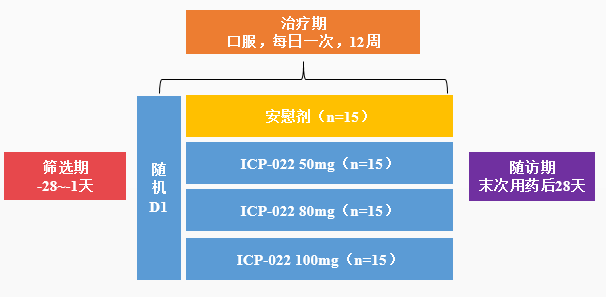


**Randomisation D1**

**Treatment Period**

**P.O., QD, for 12 weeks**

**Placebo (n=15)**

**Follow-up Period**

**28 days after the last dose**

**Screening Period**

**Days -28 to -1**

**ICP-022 50mg (n=15)**

**ICP-022 80mg (n=15)**

**ICP-022 100mg (n=15)**

Figure 1. Clinical Study Schema

## 3.2. Determination of Sample Size

Since this is a study to evaluate the safety, PK, PD and PK/PD relationship of Orelabrutinib in patients with mild to moderate SLE, no formal sample size calculations were performed for this study. Instead, the sample size for each treatment cohort was chosen empirically (n=15). This study was planned to recruit 60 subjects.

## 3.3. Randomization and Blinding

Randomisation:

The subjects will be randomized to groups using the interactive web response system (IWRS) according to the randomization list generated by a non-blinded statistician who is independent of the project. This study consists of experimental groups (3 dose groups) and a placebo group, and the subjects will be assigned to the 4 dose groups at a ratio of 1:1:1:1.

For a randomized subject who withdraws or is withdrawn from the clinical study for any reason, regardless whether the investigational drug is administered or not, his/her random number will be retained, and this subject will not be allowed to enter this study again.

Blinding:

Since this is a double-blind study, the study drugs Orelabrutinib and placebo will be packaged uniformly, and the packaged drugs will be fully and completely identical in appearance. The sponsor or the sponsor's agent should designate a responsible person for randomization, who will maintain the blind codes in accordance with the relevant SOP. The sponsor should be notified promptly in case of any unblinding, either intentional or unintentional.

Emergency unblinding: On an occasion where emergency unblinding is required due to serious adverse event (SAE), it is recommended that the investigator and the sponsor hold discussion to determine the necessity of emergency unblinding. The investigator must note down unblinding-related information (e.g., date, time, reason, etc.) in detail in the source document and notify the sponsor promptly. Once emergency unblinding is performed for a subject, this subject must be withdrawn from the study.

## 3.4. Study Drug and Administration

### 3.4.1. Basic Information about Study Drug

|  | Investigational Product | Placebo |
| --- | --- | --- |
| Name | Orelabrutinib | Orelabrutinib simulant |
| Dosage Form | Tablets | Tablets |
| Strength | 10 mg; 50 mg | / |
| Storage Conditions | Store in tightly closed containers, protected from light; see the drug label for details | Store in tightly closed containers, protected from light; see the drug label for details |

The study drugs will be supplied by Beijing InnoCare Pharma Technology Co., Ltd. The manufacture date and expiry date of the drug will both be provided at the time of use, please check.

### 3.4.2. Dosage and Administration

Orelabrutinib (50 mg, 80 mg, or 100 mg) or placebo will be orally administered, once daily (QD) at the same time each day as specified in the protocol. The drug should be swallowed whole with water each time, without chewing or crushing. The duration of treatment is 12 weeks.

If a subject missed a dose of the study drug and it is not beyond 12 hours from the original scheduled time, said subject should be instructed to make up the dose as soon as possible. However, if it is beyond 12 hours from the original scheduled time, the subject should be instructed to skip the dose and take the next dose as scheduled.

## 3.5. Schedules of Activities

Table 1. Schedules of Activities

| **Phase** | | **Screening Period** | **Treatment Period** | | | | | | **Withdrawal Visit** | **Follow-up Period** |
| --- | --- | --- | --- | --- | --- | --- | --- | --- | --- | --- |
| **Week 1** | | **Week 2** | **Week 4** | **Week 8** | **Week 12** |
| **Visit Time** | | **Days -28 to -1** | **D1** | **D2** | **D14** | **D28** | **D56** | **D84** | **Last dose** | **28 days after the last dose** |
| **Time Window** | | **\** | **\** | **\** | **± 1 day** | **± 3 days** | **± 3 days** | **± 3 days** | **Within 3 days** | **±5 days** |
| **Study Procedure Management** | | | | | | | | | | |
| **Informed consent1** | | X |  |  |  |  |  |  |  |  |
| **Inclusion/exclusion criteria assessment** | | X |  |  |  |  |  |  |  |  |
| **Demographic data2** | | X |  |  | X | X | X | X |  |  |
| **Past medical history (including conditions and treatments)** | | X |  |  |  |  |  |  |  |  |
| **Concomitant medications records** | | X | | | | | | | | |
| **Study Drug Treatment** | | | | | | | | | | |
| **Randomization** | |  | X |  |  |  |  |  |  |  |
| **Orelabrutinib administration** | |  | Q.D | | | | | |  | |
| **Drug dispensing** | |  | X |  | X | X | X |  |  |  |
| **Drug return** | |  |  |  | X | X | X | X |  |  |
| **Treatment compliance3** | |  |  |  | X | X | X | X |  |  |
| **Laboratory Tests** | | | | | | | | | | |
| **Physical examination, vital signs** | | X | X |  | X | X | X | X | X | X |
| **Hematology4** | | X | X |  | X | X | X | X | X | X |
| **Urinalysis5** | | X | X |  | X | X | X | X | X | X |
| **Blood chemistry6** | | X | X |  | X | X | X | X | X | X |
| **Electrolytes7** | | X | X |  | X | X | X | X | X | X |
| **Amylase and lipase8** | | X | X |  | X | X | X | X | X | X |
| **Coagulation Function9** | | X | X |  |  | X | X | X | X | X |
| **Thyroid function five items** | | X |  |  |  | X |  | X | X | X |
| **Thyroid ultrasound10** | | X |  |  |  | X**10** |  | X**10** |  |  |
| **Chest X-ray11** | | X | As clinically indicated | | | | | |  |  |
| **Anti-Smith antibodies** | | X |  |  |  |  |  |  |  |  |
| **Pregnancy test (female subjects of child-bearing potential only)12** | | X | X |  |  | X | X | X | X | X |
| **Tuberculosis screening (interferon gamma release assay)** | | X |  |  |  |  |  |  |  |  |
| **HIV, HBV, HCV serology testing13** | | X |  |  |  |  |  |  |  |  |
| **HBV DNA test13** | | As clinically indicated | | | | | | |  |  |
| **12-lead ECG14** | | X | X | X | X | X | X | X | X | X |
| **Echocardiogram15** | | X | As clinically indicated | | | | | | X**15** | As clinically indicated |
| **Adverse event recording16** | | X | | | | | | | | |
| **PK, PD, and Other Assessments** | | | | | | | | | | |
| **PK investigation17** | |  | X | X | X |  |  |  |  |  |
| **PD investigation18** | **Anti-dsDNA antibody, ANA** | X | X |  |  | X |  | X |  |  |
| **Ig, C3, C4** | X | X |  |  | X |  | X |  |  |
| **IFN-α** |  | X |  |  | X |  | X |  |  |
| **IL-6** |  | X |  |  | X |  | X |  |  |
| **Total B cells, Beffs, Bregs** |  | X |  |  | X |  | X |  |  |
| **Erythrocyte sedimentation rate** |  | X |  |  | X |  | X |  |  |
| **Target occupancy19** | | X | X |  | X |  |  |  |  |  |
| **24-hour urine protein20** | | X | As clinically indicated | | | | | X | X |  |
| **SRI 21** | |  |  |  |  | X |  | X | X |  |
| **SLEDAI-2K** | | X |  |  |  | X |  | X | X |  |
| **BILAG-2004** | | X |  |  |  | X |  | X | X |  |
| **PGA** | | X |  |  |  | X |  | X | X |  |
| **Joint assessment** | | X |  |  |  | X |  | X | X |  |

**Note:**

**◆ Withdrawal visit:** For a subject who withdraws from the study prematurely for any reason, the investigator should arrange for the subject to return to the study site within 3 days after the last dose for a withdrawal visit to complete assessments. For subjects who have completed the 12-week treatment according to the study schedule, i.e., after completion of the tests at Day 84 visit, a withdrawal visit is not required.

1. Informed consent must be obtained before entry into the screening period of the study.

2. Demographic data include date of birth, sex, height, and body weight. Body weight is only measured on Days 14, 28, 56 and 84.

3. Treatment compliance = number of tablets taken/number of tablets to be taken, calculated as of last dispensing. For each subject, treatment compliance should be between 80% and 120%; otherwise, the investigator should communicate with the subject in a timely manner to improve the subject's awareness of treatment compliance.

4. Hematology should include complete blood count, i.e., white blood cell (WBC) including lymphocytes and neutrophils, red blood cell (RBC), hemoglobin, hematocrit, and platelets. Hematology results obtained within 5 days prior to the first dose are acceptable for D1 hematology, and a repeat test is required if the results are > 5 days. On-treatment blood samples should be collected prior to dosing.

5. Urinalysis included protein, glucose, red blood cells (qualitative or quantitative results, including blood or occult blood). Urinalysis results obtained within 5 days prior to the first dose are acceptable for D1 urinalysis, and a repeat test is required if the results are > 5 days. On-treatment urine samples should be collected prior to dosing.

6. Blood biochemistry includes: AST, ALT, glutamyl transpeptidase (GGT), albumin (ALB), total bilirubin (TBIL), direct bilirubin (DBIL), blood urea nitrogen (BUN) or urea, creatinine (Cr), triglyceride (TG), total cholesterol (TC), glucose (Glu) and lactate dehydrogenase (LDH). Blood biochemistry results obtained within 5 days prior to the first dose are acceptable for D1 blood biochemistry, and a repeat test is required if the results are > 5 days. On-treatment blood samples should be collected prior to dosing.

7. Electrolytes include: potassium (K), sodium (Na), chloride (Cl), calcium (Ca), magnesium (Mg) and phosphorus (P). Electrolyte results obtained within 5 days prior to the first dose are acceptable for D1 electrolyte test, and a repeat test is required if the results are > 5 days. On-treatment blood samples should be collected prior to dosing.

8. Amylase test includes: serum amylase (AMY); lipase test includes: serum lipase (LPS). Amylase and lipase test results obtained within 5 days prior to the first dose are acceptable for D1 test, and a repeat test is required if the results are > 5 days. On-treatment blood samples should be collected prior to dosing.

9. Coagulation function test includes: international normalized ratio (INR), prothrombin time (PT) and activated partial thromboplastin time (APTT). Coagulation results obtained within 5 days prior to the first dose are acceptable for D1 coagulation function test, and a repeat test is required if the results are > 5 days. On-treatment blood samples should be collected prior to dosing.

10. Timing of thyroid ultrasound test: at screening, Day 28 (results within 5 days before or after the day of visit are acceptable) and Day 84 (results within 5 days before or after the day of visit are acceptable).

11. Chest X-ray will be performed at screening. The chest X-ray can be waived for a subject if there are available results of lung CT scan performed due to COVID-19 or for other reasons.

12. Blood pregnancy test (only female subjects of child-bearing potential) will be performed at screening. Urine pregnancy tests will be performed every 4 weeks through the treatment period to 28 days after the last dose. If a urine pregnancy test is positive, a further serum pregnancy test will be conducted for confirmation. On-treatment urine or blood samples should be collected prior to dosing.

13. HIV, HBV and HCV tests will be performed at screening. Relevant tests may be repeated during the treatment and follow-up periods as clinically indicated. If HBcAb test is positive at screening, HBV DNA test should be repeated every 4 weeks (Weeks 4, 8, and 12). If the DNA titer exceeds the normal range, antiviral therapy is recommended, or appropriate treatment should be given at the discretion of the investigator. Subjects may continue to receive treatment until the protocol-specified criteria for interruption or discontinuation of treatment are met.

14. Timing of 12-lead ECG monitoring: pre-dose and post-dose at Day 1; before leaving the study site at Day 2; post-dose at Day 14, Day 28, Day 56 and Day 84; at the withdrawal visit and during the follow-up period. During the treatment period, post-dose ECGs should be monitored within 2 - 4 hours after dosing. The ECG assessment for each subject should be preceded by at least 5 minutes of rest in a semi-supine position.

15. Timing of echocardiography: at screening, during the treatment period (as clinically indicated), at the withdrawal visit (results within 5 days after the visit are acceptable), and during the follow-up period (as clinically indicated).

16. Refer to Section 8.2.5 of the protocol for details regarding the collection and reporting of adverse events.

17. PK sampling will be performed for the subjects at the following time points: within 60 min before dosing and at 30 min, 1 h, 2 h, 4 h, 8 h, 12 h and 24 h after dosing (pre-dose at D2 and D15) at Day 1 and Day 14.

18. PD sampling will be performed for the subjects at the following time points: pre-dose at Day 1 (or within 7 days after the first dose), Day 28 and Day 84. PD investigation involves multiple test items. If a subject has test results of anti-dsDNA antibody, ANA, Ig, C3, C4 and erythrocyte sedimentation rate (ESR) that were obtained within 7 days prior to the first dose, these tests do not need to be repeated on Day 1; If a study site is not capable of testing a PD item and cannot send the samples promptly to a facility that is capable of doing such a test, subjects enrolled at this site may not participate in the testing for this PD item.

19. Blood sampling for target occupancy assay will be performed at the following time points: within 60 min pre-dose (or within 5 days before the first dose) and 4 h (± 10 min) post-dose at Day 1; within 60 min pre-dose and 4 h (± 10 min) post-dose at Day 14. If a study site is not capable of performing this assay and cannot send the samples promptly to a facility that is capable of doing such assay, subjects enrolled at this study site may not participate in the target occupancy assay.

20. Quantitative 24-hour urine protein test is required at screening. For subjects with urine protein ≥ 1+, a 24-hour urine protein test may be performed as clinically indicated.

21. The SRI assessment will be performed at the following time points to assess disease activity through three assessment systems - SLEDAI-2K, British Isles Lupus Assessment Group 2004 (BILAG 2004) and Physician Global Assessment (PGA): at screening, Day 28, Day 84, and the withdrawal visit. See Section 8.6.1 of the protocol.

# 4. Evaluation Variables

## 4.1. Primary Endpoints

**•** Incidences of treatment-emergent serious adverse events (TESAEs) and treatment-related serious adverse events (TRSAEs);

**•** Incidences of treatment-emergent adverse events (TEAEs) and treatment-related adverse events (TRAEs), assessed by severity;

**•** Vital signs, electrocardiogram (ECG) and laboratory test results, etc.

- Vital signs: body temperature, blood pressure, respiratory rate, pulse;

- Physical examination: general condition, skin, head and neck, chest, abdomen, back, limbs and the nervous system;

- Laboratory tests: hematology, urinalysis, blood biochemistry, electrolytes, amylase and lipase, coagulation function and thyroid function (five items);

- Pregnancy test (female subjects of child-bearing potential only)

- Echocardiography;

- ECG: ECG should be obtained for the subject after at least 5 minutes of rest in a semi-supine position. The ECG results include corrected QTc, which calculated preferably using Fridericia formula [QTcF=QT/ (RR^0.33), where RR is the standardized heart rate value, calculated as 60 divided by the heart rate]. If the heart rate is lower than 60 beats/min, Bazetts formula [QTcB=QT/ (RR^0.5), where RR is the standardized heart rate value, calculated as 60 divided by the heart rate] will be used. However, any other alternative formulas for calculating the QTc may be used after discussion with the sponsor.

## 4.2. Secondary Endpoints

### 4.2.1. Target Occupancy

**•** BTK occupancy (Day-1, Day 1, and Day 14).

### 4.2.2. Pharmacodynamics

The following biomarkers were selected to assess the pharmacodynamic effects of Orelabrutinib:

**•** Serum levels of immunoglobulins (Ig) (IgA, IgG, IgM) on Day 28 and Day 84;

**•** Changes from baseline in the levels of Ig (IgA, IgG, IgM), C3 and C4 on Day 28 and Day 84;

**•** Changes from baseline in the serum levels of anti-dsDNA antibodies and ANA on Day 28 and Day 84;

**•** Changes from baseline in the expression levels of cytokines (IFN-α and IL-6) on Day 28 and Day 84;

**•** Change from baseline in total B-cell count at Day 28 and Day 84;

**•** Change from baseline in effector B-cell (Beffs) count at Day 28 and Day 84;

**•** Change from baseline in regulatory B cell (Bregs) count at Day 28 and Day 84;

**•** Change from baseline in the ratio of Bregs to Beffs (Bregs/Beffs) at Day 28 and Day 84;

**•** Change from baseline in the ESR at Day 28, Day 84.

### 4.2.3. Pharmacokinetics

The pharmacokinetic (PK) profile of Orelabrutinib is assessed through plasma concentration-time curve and PK parameters after dosing, including: maximum concentration (Cmax); time to maximum concentration (Tmax); half-life (T1/2); area under the plasma concentration-time curve (AUC); apparent clearance (CL/F); apparent terminal volume of distribution (Vz/F); accumulation factor (R), etc.

### 4.2.4. Efficacy

**•** Percentage of responders with an SLE Responder Index-4 (SRI-4) at Day 28 and Day 84;

**•** Percentage of responders with an SRI-6 at Day 28 and Day 84;

**•** Percentage of subjects with a reduction of ≥ 4 from baseline in SLE Disease Activity Index-2000 (Systemic Lupus Erythematosus Disease Activity Index-2K [SLEDAI-2K]) at Day 28 and Day 84;

**•** Change in the percentage of subjects achieving a reduction in arthritis and/or rash from baseline (as defined by SLEDAI-2K) at Day 84;

**•** Change from baseline in tender and swollen joint counts (the 66/88 joint count) at Day 28 and Day 84 for subjects with arthritis at baseline;

**•** Percentage of subjects with proteinuria ≤ 0.5 g/24 h or a reduction of ≥ 25% from baseline at Day 84 among subjects with baseline proteinuria > 0.5 g/24 h.

Relevant Definitions or Assessments:

SRI-4 response is defined as: 1) a ≥ 4 points decrease from baseline in SLEDAI-2K score; 2) no new BILAG2004 A score or no more than 1 new BILAG2004 B score; and 3) no deterioration in PGA by ≥ 0.3 points from baseline. When all three of the above criteria are met, the patient is considered to have an SRI-4 response.

SRI-6 response is defined as: 1) a ≥ 6 points decrease from baseline in SLEDAI-2K score; 2) no new BILAG2004 A score or no more than 1 new BILAG2004 B score; and 3) no deterioration in PGA by ≥ 0.3 points from baseline. When all three of the above criteria are met, the patient is considered to have an SRI-6 response.

SLEDAI-2K assessment: The SLEDAI-2K is a validated index instrument for the assessment of SLE disease activity. This index primarily evaluates the presence of 24 clinical features in 9 organ systems (see Appendix 2 of the protocol). At the same, it measures the disease activity in SLE patients over the preceding 10 days. The index system is weighted depending on the features. At screening, if a certain feature was present in the patient over the preceding 10 days, the physician will assign a score to this feature (the more severe the feature, the higher the score) and then obtain a total SLEDAI-2K score (rang: 0 - 105 scores) by simply adding the scores for various features.

BILAG2004 assessment: The BILAG2004 index is a validated global disease activity index that focuses on the change (absent, improving, same, worse, or new) in the patient's clinical presentations of the disease in the last 4 weeks over the preceding 4 weeks, according to the physician's intention to treat. This index includes 9 organ systems, 97 clinical signs, symptoms and laboratory parameters (see Appendix 5 of the protocol).

PGA assessment: The PGA is the global assessment of disease activity in a patient with SLE by the physician using a visual analog scale (VAS) (see Appendix 6 of the protocol).

# 5. Analysis Datasets

The division of population for all analysis data sets will be discussed and finally determined at the data review meeting.

## 5.1. Full Analysis Set

Full analysis set (FAS): all subjects who received at least one dose of the study drug.

The FAS will be used for the analyses of demographic and baseline data.

## 5.2. Per-Protocol Set

Per-protocol set (PPS): on the basis of FAS, this set includes subjects who meet the key inclusion criteria but none of the key exclusion criteria and have Day 84 efficacy assessment results, with good compliance, without any major protocol violation that would seriously affect the efficacy assessment results.

The PPS will be used for efficacy analysis.

## 5.3. Safety Set

Safety set (SS): all subjects who received at least one dose of the study drug with documented safety variables.

The SS will be used for the analyses of the primary endpoints (safety endpoints), drug exposure and compliance, and concomitant medications.

## 5.4. PK Concentration Set

Pharmacokinetic concentration analysis set (PKCS): all subjects who received at least one dose of the study drug and have valid post-dose concentration data.

The PKCS will be used for the statistical analysis of pharmacokinetic concentrations.

## 5.5. PK Parameter Set

Pharmacokinetic parameter analysis set (PKPS): all subjects who received at least one dose of the study drug and have at least one valid post-dose PK parameter. Subjects with major protocol deviations that may potentially affect the PK data will be excluded from the PKPS. Criteria for exclusion from an analysis set: 1) a serious protocol deviation (PD) that affects the accuracy of the data; 2) a pre-dose concentration exceeding 5% of Cmax; 3) vomiting at a concentration lower than 2 * median Tmax; and 4) extrapolation of AUC exceeding 20%, which affects the accuracy of some parameters.

The PKPS will be used for the statistical analysis of pharmacokinetic parameters.

## 5.6. Pharmacodynamic Analysis Set

Pharmacodynamic analysis set (PDAS): All subjects who received at least one week of the study drug and have available PD evaluation data.

The PDAS will be used for the analyses of pharmacodynamic data.

# 6. Methods of Statistical Analysis

## 6.1. General Considerations for Statistical Analysis

### 6.1.1. General Principle

All statistical analyses will be performed using SAS® version 9.4 or higher.

Unless otherwise specified, unscheduled visits will only be used for baseline derivation and will not be included in the statistical analysis. Data from unscheduled visit will be presented in the form of listing.

Quantitative data will be statistically described by the number of subjects, mean, standard deviation (SD), median, quartiles (Q1 and Q3), minimum and maximum. For analysis of plasma drug concentrations and PK parameters, the quantitative data will also be summarized using coefficient of variation (CV), geometric mean and geometric CV as appropriate. Qualitative data will be statistically described by frequency and percentage (unless otherwise specified). Percentages will be calculated using the number of subjects in corresponding group in the analysis set as the denominator. Unless otherwise specified, all statistical tests will be performed using two-sided tests and a *P* value of less than 0.05 (two-sided) will be considered to be statistically significant.

The decimal places for statistical analyses are retained as follows (unless otherwise specified):

Table 2. General Rules for the Retention of Decimal Places

| **Statistics** | **Number of Decimal Places** |
| --- | --- |
| All statistics | Up to 4 decimal places |
| Min, Max | Same as that of the source data |
| Mean, geometric mean, median, Q1, Q3 | 1 more decimal place than the source data |
| Standard deviation | 2 more decimal places than the source data |
| CV, geometric CV | 2 decimal places, expressed as percentage |
| Derived data | 2 decimals  • Presented to 2 significant figures when < 0.01 |
| Frequency | 0 |
| Percent | 1 decimal place, expressed as percentage  • For results with a frequency of 0, displayed the frequency of 0 only, instead of percentage  • For results with a percentage of 100%, displayed as "100%" |
| PK and PD Data | Presented to 3 significant figures |

### 6.1.2. Baseline Value

Unless otherwise specified, a baseline value is defined as the last non-missing observation before the first dose of the study drug

Change from baseline = value at a specific visit after treatment -baseline value

### 6.1.3. Handling of Missing Values

#### 6.1.3.1. Handling of missing date

Handling of missing AE dates:

**•** The start date of AE is missing

- If both the year and month are known

o When the year and the month are earlier than those of the first dose of the study drug, use the last day of the known month for imputation

o When the year and the month are equal to those of the first dose of the study drug, use the date of the first dose of the study drug for imputation

o When the year and the month are later than those of the first dose of the study drug, use the first day of the known month for imputation

- If only the year is known

o When the year is earlier than that of the first dose of the study drug, use "31 Dec" for imputation

o When the year is equal to that of the first dose of the study drug, use the date of the first dose of the study drug for imputation

o When the year is later than that of the first dose of the study drug , use "01 Jan" for imputation

- If the year, month and day are all missing

o Use the date of the first dose of the study drug for imputation

**•** The end date of AE is missing

- If both the year and month are known, use the last day of the known month for imputation

- If only the year is known, use "31 Dec" for imputation

**•** If the imputed start date is later than the end date, use the end date as corresponding start date

**•** In other cases than the above, the data should be considered missing.

Handling of missing CM date:

**•** The start date of CM is missing

- If both year and month are known, the last day of the known month will be used for imputation.

- If only the year is known, use "01 Jan" for imputation

- If the year, month and day are all missing, no imputation will be made for the start date of CM

**•** The end date of CM is missing

- If both the year and month are known, use the last day of the known month for imputation

- If only the year is known, use "31 Dec" for imputation

- If the year, month and day are all missing, no imputation will be made for the end date of CM

**•** If the imputed end date is later than the date of the last visit, the date of the last visit will be used as the corresponding end date

Handling of missing diagnosis date of SLE:

**•** If the year is missing, it is considered missing;

**•** If the month is missing, use June for imputation;

**•** If the day is missing, use the first day for imputation.

For other missing data in this study, statistical analysis and description will be provided according to the original status of the collected data.

### 6.1.4. Derived Variables

If an endpoint is derived from the source data collected on the CRFs, a detailed description and definition should be provided.

Unless otherwise specified, the periods in this study are calculated as "end date - start date + 1".

The units of time will be converted according to the following rules:

**•** 1 month = 30.4375 days

**•** 1 year = 365.25 days

## 6.2. Subject Characteristics

All subjects who have signed the Informed Consent Form (ICF) will be included in a summary of subject disposition as follows:

### 6.2.1. Subject Disposition

Subject disposition throughout the study will be described using subject disposition flow chart.

The number and percentage of subjects who passed/failed the screening among all screened subjects will be summarized, presenting the number and percentage for screen failures by reason.

The screening results of all screened subjects will be summarized by study site, providing the date of first subject informed consent, the number of subjects screened, the number of subjects treated, as well as the number and percentage of subjects included in various analysis sets (FAS, PPS, SS, PKCS, PKPS and PDAS) at each study site.

The number and percentage of subjects treated/not treated and the number and percentage of subjects who completed the study/withdrew from the study will be summarized for all enrolled subjects. In addition, the number and percentage of withdrawals will be provided by reason. Moreover, the number and percentage of subjects included in each analysis set (FAS, PPS, SS, PKCS, PKPS and PDAS) will also be summarized for all enrolled subjects.

Details regarding subjects screened for the study, subjects who did not complete the study and subjects excluded from the analysis sets will be provided in the form of listing.

### 6.2.2. Protocol Deviations

Protocol deviations will be classified into minor and major. A major protocol deviation is defined as a protocol deviation that render the data invalid and thus affects the conclusion of the study. A major PD may cause the data of the involved subject to be excluded from corresponding analysis set.

At the data review meeting prior to database lock, the investigator and the Sponsor will assess and agree on whether the protocol deviation is "minor" or "major". Major protocol deviations will be finally tabulated and documented prior to database lock.

All protocol deviations will be analyzed using the FAS and summarized by subject. Deviations will be summarized by dose group and total according to severity (minor or major), and the number and percentage will be calculated.

Details of protocol deviations will be listed by subject.

### 6.2.3. Demographics and Baseline Characteristics

#### 6.2.3.1. Demographic

Descriptive statistics will be provided for the subjects' demographic data by dose group and total based on the FAS, including:

**•** Age (years)

**•** Gender (M/F)

**•** Ethnicity (Han vs. other)

**•** Height (cm)

**•** Body Weight (kg)

**•** BMI (kg/m2)

Relevant calculation formulas:

Age (yr) = (date of informed consent - date of birth + 1)/365.25, rounded down to the nearest integer.

BMI (kg/m2) = weight (kg)/(height (cm)/100)2, rounded off to one decimal place

All demographic data will be listed by subject.

#### 6.2.3.2. Other Baseline Characteristics

Descriptive statistics will be provided for the subjects' other baseline characteristics by dose group and total based on the FAS, including:

**•** History of allergy (Yes vs. No)

**•** Alcohol Intake History

- Ever-drinker (Yes vs. No)

- Current alcohol consumption status (current drinker vs. ever-drinker)

**•** History of drug abuse (Yes vs. No)

**•** History of clinical trial participation (Yes vs. No)

**•** Patient with tuberculosis (Yes vs. No)

**•** Antibodies specific for SLE at screening:

- Anti-dsDNA antibodies (negative vs. positive)

- Antinuclear antibodies ANA (negative vs. positive vs. semi-quantitative)

- Anti-Smith antibodies (negative vs. positive)

**•** Viral serology

- Assessment on clinical significance of HIV antibodies (normal vs. abnormal but not clinically significant vs. abnormal and clinically significant)

- Assessment on clinical significance of HBsAg (normal vs. abnormal but not clinically significant vs. abnormal and clinically significant)

- Assessment on clinical significance of HBcAb (normal vs. abnormal but not clinically significant vs. abnormal and clinically significant)

- Assessment on clinical significance of HCV antibodies (normal vs. abnormal but not clinically significant vs. abnormal and clinically significant)

**•** Total SLEDAI score (points), category of total SLEDAI total score (< 5 points, 5-8 points, 9-12 points, ≥ 13 points)

**•** Baseline 24 h urine protein (g/24 h), category of baseline 24 h urine protein (< 0.5 g/24 h, 0.5 to < 1.0 g/24 h, 1.0 to < 2.0 g/24 h, ≥ 2.0 g/24 h)

**•** Baseline creatinine clearance (mL/min), category of baseline creatinine clearance (≥ 90 mL/min, 60 to < 90 mL/min, < 60 mL/min)

**•** PGA score (points), PGA score category (0 - 1 points, > 1 - 2.5 points, > 2.5 - 3 points)

**•** BILAG assessment (at least 1 A, at least 1 A or 1 B, at least 1 A or 2 B, no A or B)

- Derived according to the grades in the nine organ systems on the BILAG Assessment page

**•** Low complement C3 (below the normal range), low complement C4 (below the normal range)

- Determine based on the normal range whether low complement C3/C4 is present

**•** Immunoglobulins IgG, IgA and IgM

**•** Duration of SLE disease (years)

- Duration of SLE disease (years) = (date of the first dose - diagnosis date of SLE + 1)/365.25, expressed in years

Details of subjects with a history of allergy, a drinking history, a history of drug abuse and a history of clinical trial participation will be listed.

Details of subjects with tuberculosis (TB) will be listed.

The test results of seropositive subjects will be listed. The HBV DNA test results of HBcAb-positive subjects (clinical significance of HBcAb is assessed as abnormal and clinically significant) at screening will be listed only rather than statistically analyzed.

The chest X-ray results of all subjects will be listed only rather than statistically analyzed.

The test results of all SLE antibodies (including anti-dsDNA antibodies, antinuclear antibodies ANA, and anti-Smith antibodies) will be listed by subject and visit using local hospital data.

### 6.2.4. Medical History

The subjects' past medical history will be coded using Medical Dictionary for Regulatory Activities (MedDRA) (V24.0 or higher).

Descriptive statistics by system organ class (SOC) and preferred term (PT) will be provided for the prior/concomitant medical conditions by dose group and total using the FAS, presenting the number and percentage of subjects in each category.

Details of subjects with a past medical history will be listed.

### 6.2.5. Prior/Concomitant Therapies

#### 6.2.5.1. Prior/concomitant medications/standard therapies for SLE

Prior/concomitant medications/standard therapies for SLE will be analyzed using the SS.

**Prior medications** are defined as any medication use documented prior to the first dose of the study drug. For the present study, this term refers to medications that:

**•** Have a start date and an end date before the date of the first dose of the study drug

**•** And are marked as "No" for "ongoing or not" on the "Prior/Concomitant Medications" page of the CRF

**Concomitant medications** are defined as all medications (other than the study drug) that are used after the first dose of the study drug. For the present study, this term refers to medications that:

**•** have a start date after the date of the first dose

**•** Or have a start date before the date of the first dose

- and an end date after the date of the first dose

- Or are marked as "Yes" for "ongoing or not" on the "Prior/Concomitant Medications" page of the CRF

**Concomitant standard therapies for SLE** refers to all medications (other than the study drug) that are used for the treatment of SLE after the first dose of the study drug. For the present study, this term refers to medications that:

**•** have a start date after the date of the first dose

**•** Or have a start date before the date of the first dose

- and an end date after the date of the first dose

- Or are marked as "Yes" for "ongoing or not" on the "Standard Therapies for SLE" page of the CRF

If the start date or end date of the medication is partially missing and cannot be determined clearly, it will be judged as concomitant medication or concomitant standard therapies for SLE according to conservative estimation principle.

Prior/concomitant medications will be coded using the World Health Organization (WHODrug Dictionary) Global Chinese 2021 Mar 1 or later, and the coded prior/concomitant medications will be summarized by Anatomical Therapeutic Chemical Class 1 (ATC1), ATC3 and preferred name (PN), presenting the number and percentage. If ATC3 is null, impute with ATC2; If ATC2 is null, impute with ATC1. Multiple medications recorded within the same ATC or PN category for the same subject will be counted once only.

In addition, descriptive statistics will be provided for concomitant standard therapies for SLE (the specific category and drug name will be classified according to the information medically provided), presenting the number and percentage of subjects. Including:

**•** Hormone usage (0 - 7.5 mg/d vs. > 7.5 mg/d)

- Including prednisone, prednisolone, methylprednisolone and medrol among others, classified according to drug name medically provided

(Conversion of hormone dose: methylprednisolone 4 mg = prednisone 5 mg, prednisolone 5 mg = prednisone 5 mg.)

**•** Immunosuppressant usage

- Including cyclosporine, leflunomide, azathioprine, cyclophosphamide, cycopin, mycophenolate mofetil, methotrexate, tacrolimus and thalidomide among others, classified according to the drug name medically provided

**•** Hydroxychloroquine usage

Details of prior medications, concomitant medications and concomitant standard therapies received by the subjects will be listed. Prior/concomitant medications will be listed by ATC based on the source records.

#### 6.2.5.2. Prior/concomitant non-drug therapies

Prior/concomitant non-drug therapies will be analyzed using the SS.

The subjects' prior/concomitant non-drug therapies will be categorized according to similar judgment rules as for prior/concomitant medications.

Prior/concomitant non-drug therapies will be coded using MedDRA V24.0 or higher and summarized by SOC and PT, presenting the number and percentage of subjects. Multiple non-drug therapies recorded within the same SOC or PT category for the same subject will be counted once only.

Details of prior non-drug therapies and concomitant non-drug therapies will be listed.

### 6.2.6. Drug Exposure and Treatment Compliance

Descriptive statistics will be provided for the drug exposure and treatment compliance of the subjects by dose group and total based on the SS, including:

**•** Total Duration of Exposure (Days)

**•** Actual duration of exposure (days)

**•** Planned cumulative dosage (tablets)

**•** Actual cumulative dosage (tablets)

**•** Average daily dosage (tablets/day)

**•** Treatment compliance (%), treatment compliance category (< 80%, 80% - 120%, and > 120%)

Relevant calculation formulas:

Total duration of exposure (days) = date of the last dose - date of the first dose + 1

Actual duration of exposure (days): defined as the total days of treatment with the study drug, excluding the period of missed doses or dose interruption.

Planned cumulative dosage (tablets): defined as the total number of tablets that should be received by the subject during the exposure period.

Actual cumulative dosage (tablets): defined as the sum of the number of tablets actually administered to the subject per day during the exposure period.

Average daily dosage (tablets/day) = Actual cumulative dosage (tablets)/Actual duration of exposure (days)

Treatment compliance = (actual cumulative dosage (tablets)/planned cumulative dosage (tablets)) * 100%.

Details of drug dispensing records, drug return records and drug administration records will be listed by subject.

## 6.3. Safety Evaluation

The safety evaluation of this study is based on the analysis of the primary endpoints.

Safety evaluation variables include: adverse events, laboratory tests, vital signs, physical examination and electrocardiogram (ECG).

The analysis of all safety endpoints will be based on the SS using descriptive statistics without any statistical inference (unless otherwise specified).

### 6.3.1. Adverse Events

An adverse event (AE) is defined as any untoward medical occurrence in a subject administered an investigational product, which could be any unfavorable and unintended sign, symptom, disease, or abnormal laboratory finding but does not necessarily have a causal relationship with this investigational product.

For the purpose of statistical analysis, adverse events (AEs) will be categorized into pre-treatment adverse events and treatment-emergent adverse events (TEAEs). A TEAE is defined as any AE occurring after the first dose through the safety follow-up period, and the safety follow-up period refers to 28 days after the last dose. Specific TEAE judgment rules are as follows:

**•** If the onset date and end date of an AE are before the first dose, this AE is considered to occur before treatment.

**•** An AE occurring at or after the time of first dose will be recorded as a TEAE.

**•** If the onset date or end date of an AE is missing, making it impossible to determine a temporal sequence between AE occurrence and first dose, the AE will be recorded as a TEAE.

All AEs will be coded using MedDRA V24.0 or higher and summarized by SOC and PT. The severity of AE will be graded using the Division of Microbiology and Infectious Diseases (DMID) Table 2007. Unless otherwise specified, all AE-relating statistical analyses will be based on TEAEs.

#### 6.3.1.1. Summary table of all AEs

An overall description of all AEs occurring to the subjects will be provided by dose group and total based on the SS, presenting the number of events, the number of subjects and the incidence (multiple occurrences of an AE to the same subject will be counted once only during calculation of the incidence). The summary table of AEs includes:

**•** Subjects with at least one AE

- Treatment-emergent adverse events (TEAEs)

- TEAEs of DMID Grade ≥ 3

- Treatment-related adverse events (TRAEs)

- TRAEs of DMID Grade ≥ 3

- TEAEs leading to drug interruption

- TRAEs leading to drug interruption

- TEAEs leading to drug discontinuation

- TRAEs leading to drug discontinuation

- Treatment-emergent serious adverse events (TESAEs)

- Treatment-related serious adverse events (TRSAEs)

- TESAEs leading to death

- TRSAEs leading to death

All AEs, treatment-related AEs, AEs leading to drug interruption, AEs leading to drug discontinuation, SAEs and AEs leading to death will be listed.

#### 6.3.1.2. Summary of TEAEs and TESAEs by SOC and PT

All TEAEs will be summarized by SOC and PT, presenting the number of events, the number of subjects and the incidence. Multiple occurrences of an AE to the same subject within the same SOC or PT will be counted once only during calculation of the incidence.

TEAEs will be arranged by SOC and PT, first according to the total incidence of SOC in reverse order and then according to the incidence of PT within the same SOC in reverse order. When the incidence of SOC/PT is the same, TEAEs will be arranged according to the number of events in reverse order and further in alphabetical order.

TESAEs in the summary table will be summarized in the same way as for TEAEs.

#### 6.3.1.3. Summary of TRAES and TRSAES by SOC and PT

Relatedness assessment: The relatedness of an AE to the study drug is classified into "certainly related", "probably related", "likely related", "unlikely related" and "not related". AEs related to the study drug include AEs that are assessed as "certainly related", "probably related" or "likely related" to the study drug. If the relatedness of an AE to the study is missing or unknown, it will be assessed as "related" according to the conservative principle.

All TRAEs and TRSAEs will be summarized separately, presenting the number of events, the number of subjects and the incidence. For a subject who experienced multiple AEs within the same SOC or PT, as long as one of the AEs is assessed as related to the study drug, it will be documented as "related" at the time of summarization.

#### 6.3.1.4. Summary of TEAEs and TESAEs by SOC/PT and DMID grade

Severity assessment: The severity of an AE will be graded according to DMID Table version 2007, including Grade 1, Grade 2, Grade 3 and Grade 4. If the severity of an AE is missing or unknown, it will be treated as missing.

All TEAEs, TRAEs, TEAEs of DMID grade ≥ 3 and TESAEs of DMID grade ≥ 3 will be summarized by SOC and PT, presenting the number of subjects and the incidence. For multiple occurrences of an AE to the same subject within the same SOC or PT, it will be summarized using the worst case.

#### 6.3.1.5. TEAEs and TRAEs leading to drug interruption or drug discontinuation

All TEAEs/TRAEs leading to drug interruption and TEAEs/TRAEs leading to drug discontinuation will be summarized by SOC and PT, presenting the number of events, the number of subjects and the incidence. Multiple occurrences of an AE to the same subject within the same SOC or PT will be counted once only during calculation of the incidence.

#### 6.3.1.6. TESAEs and TRSAEs leading to death

All TESAEs/TRSAEs leading to death will be summarized by SOC and PT, presenting the number of events, the number of subjects and the incidence. Multiple occurrences of an AE to the same subject within the same SOC or PT will be counted once only during calculation of the incidence.

### 6.3.2. Summary of Deaths

Deaths occurring throughout the study will be summarized by presenting the number of deaths and specific reasons by dose group and total, and the deaths will be listed.

### 6.3.3. Laboratory Tests

If laboratory parameters exceed the range of quantitation (e.g., test values containing symbols of <, ≤, > or ≥), the numerical results will be summarized as the limit of quantitation. Generally, missing laboratory test results will not be imputed. If there is more than one test value on the same day, the test value closest to the scheduled time point will be used; if two test values are equally close to the scheduled time point, the later test result will be used.

Statistical analysis of laboratory parameters will be performed according to test type based on the SS, including hematology, urinalysis, blood biochemistry, electrolytes, amylase and lipase, coagulation function and thyroid function (five items). Descriptive statistics will be provided for laboratory parameters by dose group and total according to the scheduled visit points. For quantitative parameters, the number of subjects, mean, standard deviation (SD), median, quartiles (Q1 and Q3), maximum and minimum will be calculated, and their changes from baseline will be summarized by scheduled visit point. For qualitative parameters, the frequency and percentage will be calculated. A baseline laboratory value is defined as the last non-missing observation before the first dose of the study drug.

A shift table from baseline to post-baseline values for laboratory tests according to clinical significance as assessed based on normal range or by the investigator will be provided, presenting the number and percentage of subjects.

All laboratory test results (hematology, urinalysis, blood biochemistry, electrolytes, amylase and lipase, coagulation function and thyroid function five items) will be listed by subject and visit, including unscheduled visits.

A shift table from baseline to post-baseline values for thyroid ultrasound according to the clinical significance will be provided, presenting the number and percentage of subjects. Only subjects with thyroid ultrasound results that are abnormal and clinically significant will be listed, containing the records of each subject at all visit points, with the subjects arranged by site number, group, screening number, test item and visit.

**Hematology parameters:** white blood cell count, lymphocyte count, neutrophil count, red blood cell count, hemoglobin, hematocrit and platelet count.

**Urinalysis parameters:** protein, glucose, red blood cells, and blood/occult blood.

**Blood biochemistry parameters:** aspartate aminotransferase (AST), alanine aminotransferase (ALT), gamma-glutamyl transferase (GGT), albumin (ALB), total bilirubin (TBIL), direct bilirubin (DBIL), blood urea nitrogen (BUN) or urea, serum creatinine (Cr), triglycerides (TG), total cholesterol (TC), glucose (Glu) and lactate dehydrogenase (LDH).

**Electrolyte parameters:** potassium (K), sodium (Na), chloride (Cl), calcium (Ca), magnesium (Mg) and phosphorus (P).

**Amylase and lipase parameters:** serum amylase (AMY) and serum lipase (LPS).

**Coagulation function parameters:** international normalized ratio (INR), prothrombin time (PT), and activated partial thromboplastin time (APTT).

**Thyroid function parameters:** thyroid-stimulating hormone (TSH), free triiodothyronine (FT3), free thyroxine (FT4), total triiodothyronine (TT3) and total thyroxine (TT4).

**Scheduled visit points:** baseline; pre-dose at Day 14, Day 28, Day 56 and Day 84; at the withdrawal visit (within 3 days after the last dose) and the follow-up visit (Day 28 after the last dose). Coagulation function does not include test pre-dose at Day 14. Thyroid function (five items) does not include test pre-dose at Day 14 and Day 56.

### 6.3.4. Vital Signs

Descriptive statistics will be provided for vital signs by dose group and total according to the scheduled visit points based on the SS, presenting the number of subjects, mean, standard deviation (SD), median, quartiles (Q1 and Q3), maximum and minimum will be calculated, with their changes from baseline being summarized by scheduled visit point. Baseline values of vital signs are defined as the last non-missing observations before the first dose of the study drug.

All vital sign measurements will be listed by subject and visit, including unscheduled visits.

**Vital sign parameters:** body temperature, systolic blood pressure, diastolic blood pressure, respiratory rate, pulse and body weight.

**Scheduled visit points:** baseline; pre-dose at Day 14, Day 28, Day 56 and Day 84; at the withdrawal visit (within 3 days after the last dose) and the follow-up visit (Day 28 after the last dose). Body weight does not include measurements at the withdrawal and follow-up visits.

### 6.3.5. Physical Examination

A shift table from baseline to post-baseline values for physical examination according to clinical significance as assessed by the investigator will be provided based on the SS, presenting the number and percentage of subjects.

All physical findings will be listed by subject and visit, including unscheduled visits.

**Physical examination includes:** general condition, skin, head and neck, chest, abdomen, back, limbs and the nervous system among other parameters.

**Scheduled visit points:** baseline; pre-dose at Day 14, Day 28, Day 56 and Day 84; at the withdrawal visit (within 3 days after the last dose) and the follow-up visit (Day 28 after the last dose).

### 6.3.6. 12-Lead ECG

Descriptive statistics will be provided for ECG parameters by dose group and total according to the scheduled visit points. For quantitative parameters (heart rate and QTc interval), the number of subjects, mean, standard deviation (SD), median, quartiles (Q1 and Q3), maximum and minimum will be calculated, and their changes from baseline will be summarized by scheduled visit point. Baseline values of ECG are defined as the last non-missing observations before the first dose of the study drug.

A shift table from baseline to post-baseline values for ECG parameters (ECG overall assessment) according to clinical significance as assessed by the investigator will be provided, presenting the number and percentage of subjects.

All ECG findings will be listed by subject and visit, including unscheduled visits.

**ECG parameters:** heart rate, QTc interval, global ECG overall assessment.

**Scheduled visit points:** baseline, post-dose at Day 1, and before leaving the study site on Day 2; post-dose at Day 14, Day 28, Day 56 and Day 84; at the withdrawal visit (within 3 days after the last dose) and the follow-up visit (Day 28 after the last dose).

### 6.3.7. Echocardiography

All echocardiography results will be listed by subject and visit, including unscheduled visits.

### 6.3.8. Pregnancy Test

Pregnancy test includes blood pregnancy test and urine pregnancy test, both of which incorporates human chorionic gonadotropin (HCG). HCG is a quantitative variable in blood pregnancy test and a qualitative variable (negative vs. positive) in urine pregnancy test. In order to distinguish, blood pregnancy test HCG and urine pregnancy test HCG are used below.

All pregnancy test results will be listed by subject and visit based on the SS, including unscheduled visits. The results of blood pregnancy HCG and urine pregnancy test HCG are summarized in the same listing and arranged by site number, group, screening number, test item and visit.

## 6.4. Efficacy Evaluation

The efficacy analysis of this study is based on the analysis of secondary endpoints.

The following statistical analyses will be performed for the efficacy endpoints based on the FAS:

**•** For the SRI-4 response rates at Day 28 and Day 84, descriptive statistics will be provided by dose group and total, presenting the number and percentage of subjects. In addition, the SRI-4 response rates will also be statistically analyzed for subjects with a total SLEDAI score of 5 - 8 and > 8 at baseline, respectively. In these analyses, the Chi-square test or Fisher's exact test will be used for the comparison of differences between the Orelabrutinib dose groups (50 mg,80 mg and 100 mg) and the placebo group, and the Newcombe-Wilson method will be used to calculate rate differences between Orelabrutinib dose groups (50 mg, 80 mg and 100 mg) and placebo group and corresponding 95% confidence intervals (CIs). Moreover, total SLEDAI scores and their changes from baseline will be descriptively summarized by visit, and the t-test or Wilcoxon rank-sum test will be used for the comparison of differences between the Orelabrutinib dose groups (50 mg, 80 mg and 100 mg) and the placebo group; statistical analysis will be performed for BILAG-2004 variables at baseline, Day 28 and Day 84, and the Chi-square test or Fisher's exact test will be utilized for comparison between groups;

**•** For the SRI-6 response rates at Day 28 and Day 84, descriptive statistics will be provided by dose group and total, presenting the number and percentage of subjects; the Chi-square test or Fisher's exact test will be used for the comparison of differences between the Orelabrutinib dose groups (50 mg, 80 mg, 100 mg) and the placebo group; the Newcombe-Wilson method will be utilized to calculate rate differences between groups and corresponding 95% CIs.

**•** For the rates of ≥ 4 points reduction from baseline in SLEDAI-2K at Day 28 and Day 84, descriptive statistics will be provided by dose group and total, presenting the number and percentage of subjects; the Chi-square test or Fisher's exact test will be used for the comparison of differences between the Orelabrutinib dose groups (50 mg, 80 mg, 100 mg) and the placebo group; the Newcombe-Wilson method will be utilized to calculate rate differences between groups and corresponding 95% CIs;

**•** For remission in arthritis, rash, arthritis and rash, and arthritis or rash at Day 84, descriptive statistics will be provided by dose group and total, presenting the number and percentage of subjects; the Chi-square test or Fisher's exact test will be used for the comparison of differences between the Orelabrutinib dose groups (50 mg, 80 mg, 100 mg) and the placebo group; the Newcombe-Wilson method will be utilized to calculate rate differences between groups and corresponding 95% CIs. A responder is defined as a subject who achieved a reduction from baseline (screening period) in scores for clinical features (arthritis and rash) in SLEDAI-2K assessment at Day 84, as documented on the CRF.

**•** For subjects with arthritis at baseline, the *t-*test or Wilcoxon rank-sum test will be used to compare differences in changes from baseline in tender joint count and swollen joint count (the 66/88 joint counts) at Day 28 and Day 84 between the Orelabrutinib dose groups (50 mg, 80 mg, 100 mg) and the placebo group, with the results being presented by dose group and total. A subject with arthritis baseline is defined as a subject with a tenderness score of ≥ 1 point or a swelling score of ≥ 1 point during joint assessment at screening.

**•** For subjects with baseline proteinuria > 0.5 g/24 h, descriptive statistics will be provided for subjects with proteinuria ≤ 0.5 g/24 h or a ≥ 25% reduction from baseline at Day 84 by dose group and total, presenting the number and percentage of subjects; the Chi-square test or Fisher's exact test will be used for the comparison of differences between the Orelabrutinib dose groups (50 mg, 80 mg, 100 mg) and the placebo group; the Newcombe-Wilson method will be utilized to calculate rate differences between groups and corresponding 95% CIs. A subject with baseline proteinuria > 0.5 g/24 h is defined as a subject with a quantitative test result of > 0.5 g/24 h at screening, as documented on the "24-h urine protein" page of the CRF.

**•** For PGA deterioration at Day 28 and Day 84, descriptive statistics will be provided by dose group and total, presenting the number and percentage of subjects; the Chi-square test or Fisher's exact test will be used for the comparison of differences between the Orelabrutinib dose groups (50 mg, 80 mg, 100 mg) and the placebo group; the Newcombe-Wilson method will be utilized to calculate rate differences between groups and corresponding 95% CIs. PGA deterioration is defined as an increase of ≥ 0.3 points in the score from baseline.

**•** For "no new BILAG-2004 A score" or "no more than one new B score" at Day 28 and Day 84, descriptive statistics will be provided by dose group and total, presenting the number and percentage of subjects; the Chi-square test or Fisher's exact test will be used for the comparison of differences between the Orelabrutinib dose groups (50 mg, 80 mg, 100 mg) and the placebo group; the Newcombe-Wilson method will be utilized to calculate rate differences between groups and corresponding 95% CIs.

**•** For various SLEDAI-2K score descriptors (including vasculitis, arthritis, cylindruria, hematuria, proteinuria, pyuria, rash, alopecia, mucosal ulcer, low complement, anti-ds-DNA, platelet decreased, white blood cell decreased and fever) at screening, Day 28 and Day 84, descriptive statistics will be provided by dose group and total, presenting the number and percentage of subjects; the Chi-square test or Fisher's exact test will be used for the comparison of differences between the Orelabrutinib dose groups (50 mg, 80 mg, 100 mg) and the placebo group; the Newcombe-Wilson method will be utilized to calculate rate differences between groups and corresponding 95% CIs.

Analyses of the secondary endpoints will be performed based on the PPS using the same analytical method as for the FAS.

In addition, based on the FAS, comparison of differences in the following parameters will be made between the dose groups and the placebo group, and the Newcombe-Wilson method will be utilized to calculate rate differences between groups and corresponding 95% CIs.

**•** For the SRI-4 response rates at Day 28 and Day 84 in subjects with or without abnormalities of SLEDAI variables at baseline, statistical analysis will be performed by dose group and total.

**•** For subjects with baseline proteinuria > 0.5 g/24 h, the proportion of subjects with proteinuria ≤ 0.5 g/24 h on Day 84, or the proportion of subjects with proteinuria reduction ≥ 25% from baseline at Day 84 or the proportion of subjects with remission of proteinuria remission will be statistically analyzed by dose group and total. (The PPS-based results will also be provided for this variable).

**•** Statistical analysis will be performed on subjects with at least one BILAG-2004 A or B score and subjects with no A or B score at Day 84.

- At least one A score or one B score is defined as that the grade/score for any organ system meets A or B in the BILAG-2004 assessment. No A score or B score is defined as that the grades/scores for all organ systems do not meet A or B in the BILAG-2004 assessment.

The definitions of SRI-4 response rate and SRI-6 response rate are detailed in [Section 4.2.4](#编号424) of this SAP.

Statistical analyses for SRI, BILAG 2004 and SLEDAI-2K assessments will be performed using data from protocol version V4.0.

The results of SRI assessment, BILAG 2004 assessment, PGA, SLEDAI-2K assessment, joint assessment and 24h urine protein will be listed by subject and visit, including unscheduled visits.

## 6.5. Pharmacokinetic Evaluation

### 6.5.1. Collection and Disposition of PK Samples

PK blood samples will be collected from all subjects participating in the study, with approximately 3 mL of whole blood collected at each blood sampling time point. Blood samples will be tested at designated laboratories. The subjects will be required to remain fasted from 10 hours pre-dose to 4 hours post-dose at Day 1 and Day 14, respectively, and may be provided with one piece of Snickers or chocolate 2 hours after dosing. **However, only PK samples from subjects treated with Orelabrutinib will be tested.** Refer to "Manual for Collection of Pharmacokinetic Samples" for specific requirements for the collection, treatment and storage of blood samples.

Time points of PK sampling:

Day 1 and Day 14: 60 min pre-dose; 30 min, 1 h, 2 h, 4 h, 8 h, 12 h and 24 h post-dose (before the dose at D2 and D15). The window at Day 14 is ± 1 day.

Table 3. Allowable Deviations from the Time Points of PK Sampling

| **Time Points of Blood Sampling** | **Acceptable Window** |
| --- | --- |
| 60 mins pre-dose | 60 mins pre-dose |
| 30 min and 1 h post-dose | ±5 min |
| 2 h - 12 h post-dose | ±10 min |
| 24 h post-dose | ±30 min |

### 6.5.2. Data Handling Instructions

#### 6.5.2.1. Treatment of plasma drug concentrations below the lower limit of quantification

For statistical summaries, unless otherwise specified:

**•** All concentration values below the lower limit of quantification (BQL) will be treated as 0 and represented as "BQL" in the data listings

For drawing individual plasma concentration-time curves, unless otherwise specified:

**•** BQL data occurring before Tmax will be treated as 0;

**•** BQL data occurring after Tmax will be treated as missing;

**•** Pre-dose points will not be displayed in semi-logarithmic plots

When calculating PK parameters, unless otherwise specified:

**•** BQL data between 0 h and the first measurable value will be treated as 0

**•** BQL data between two measurable values will be treated as missing

**•** BQL data occurring after the last measurable value will be treated as missing

**•** If there were two or more than two consecutive BQL data after Tmax, subsequent concentrations after the first BQL will be treated as missing

#### 6.5.2.2. Handling of Missing Values and Outliers

Missing PK data will not be imputed.

If the PK concentration data is not collected or is missing, the missing data will not be included in statistical summary, but will only be presented in listings and treated as missing. If the deviation from the time of blood sampling is sufficient to account for a bias in the data or to cause the concentration value to be flagged as abnormal by the PK analyst, the concentration data will not be included in the statistical summary and will be explained in notes in the corresponding summary table.

If a PK parameter cannot be calculated from the PK concentration, it will be treated as missing in the statistical summary tables and will be displayed as not calculable (NC) in the listings. If more than 50% of the data is missing for a certain PK parameter, that parameter will not be included in statistical analysis.

If a subject has a known bias in the estimation of a PK parameter (protocol deviation affecting the PK data), that parameter will not be included in the statistical calculation and statistical analysis of the summary tables and should be explained in the table notes.

### 6.5.3. PK Parameter Calculation

The plasma concentration data will be sent to Peking University Clinical Research Institute by the statistical analysis organization (GCP ClinPlus Co., Ltd.), and Peking University Clinical Research Institute will perform calculations of PK parameters based on WinNonlin 8.1 or higher.

PK parameters will be calculated for the dose at Day 1 and the dose at Day 14, respectively. For the dose at Day 1, the PK parameters of the first dose will be calculated using the concentration data measured at 60 min pre-dose and 30 min, 1 h, 2 h, 4 h, 8 h, 12 h and 24 h (before the dose at D2) post-dose at Day 1; for the dose at Day 14, the steady-state PK parameters will be calculated using the concentration data measured at 60 min pre-dose and 30 min, 1 h, 2 h, 4 h, 8 h, 12 h, and 24 h (before the dose at D15) post-dose at Day 14.

PK parameters, including maximum concentration (Cmax), time to maximum concentration (Tmax), half-life (T1/2), area under the plasma concentration-time curve (AUC), apparent clearance (CL/F), apparent volume of distribution (Vz/F) during the terminal phase and accumulation factor (R), will be calculated by dosing at Day 1 and dosing at Day 14 using the non-compartmental model based on each subject's serum concentration and actual sampling time.

Table 4. PK Parameters for Day 1 and Corresponding Definitions

| **Parameter** | **Definition** |
| --- | --- |
| Cmax | Peak concentration.  Obtained directly from measured plasma concentration-time data. |
| AUC0-24h | Area under the plasma concentration-time curve from 0 hours to 24 hours post-dose.  Calculated by the linear trapezoidal rule: AUC (i, i+1) = (Ti+1 - Ti) (Ci + Ci+1)/2, AUC0-24h is the sum of all AUC (i, i+1) values from 0 h to 24 h. |
| Tmax | Time to peak concentration.  Obtained directly from measured plasma concentration-time data. Defined as the time at which the first Cmax occurs (when multiple peak concentration values exist), unless otherwise specified |
| T1/2 | Elimination half-life.  T1/2 = ln2/λz. |
| Vz/F | Apparent volume of distribution during the terminal phase.  Based on the ratio of clearance to elimination rate constant, Vz/F = CL/F/λz. |
| CL/F | Apparent clearance.  Based on the ratio of dose to AUC0-∞: CL/F = Dose/AUC0-∞. |
| λz | Elimination rate constant.  The best curve of the elimination phase is obtained using the least square method, and then the slope is multiplied by 2.303 to obtain λz value. |
| AUC0-inf | Area under the plasma concentration curve extrapolated to infinity.  AUC0-inf = AUC0-t + Ct/λz (Ct is the last measurable plasma concentration and λz is the terminal phase elimination rate constant). |
| AUC%extrap | Percentage of residual area. |

Table 5. PK Parameters for Day 14 and Corresponding Definitions

| **Parameter** | **Definition** |
| --- | --- |
| Cmin,ss | Though concentration at steady state  Obtained directly from measured plasma concentration-time data. |
| Cmax,ss | Maximum concentration at steady state.  Obtained directly from measured plasma concentration-time data. |
| Cavg,ss | Average steady-state concentration; Cavg,ss = AUC0-tau,ss/tau. Tau is the dosing interval |
| AUCtau | Area under the plasma concentration-time curve over a dosing interval. |
| Tmax,ss | Time to maximum concentration at steady state. |
| T1/2,ss | Elimination half-life of the last dose, t1/2 = ln2/λz. |
| AUC0-inf,ss | Area under the plasma concentration-time curve from 0 h to infinity at steady state. AUC0-inf,ss = + + λz, using the first part of the formula in the ascending phase of the curve and the middle part of the formula in the descending phase of the curve, where is the concentration at the last quantifiable point in the descending phase of the curve. |
| CLss/F | Apparent clearance at steady state, CLss/F = Dose/AUCtau,ss |
| Vd/F | Apparent volume of distribution at steady state. |
| DF | Degree of fluctuation, DF = 100* [(Cmax,ss - Cmin,ss)/Cavg] |
| R | Accumulation ratio.  Rmax = Cmax,ss/Cmax, dose1. Cmax,ss is the Cmax at steady state on Day 14, and Cmax, dose1 is the Cmax at Day 1.  RAUC = AUCτss/AUCτdose1. AUCτss is AUC0-24h at steady state on Day 14 and AUCτdose1 is AUC0-24h at Day 1. |

### 6.5.4. PK Statistical Analysis

#### 6.5.4.1. Analysis of PK concentration data

**Handling of BQL data:**

**•** Plasma concentrations below the lower limit of quantification are expressed as "BQL" and will be treated as 0 in descriptive statistics, with the number of BQL data at each time point indicated

**•** If the mean is 0, geometric mean, coefficient of variation (CV) and geometric CV will be treated as "NA"

**•** Specifically, the geometric mean and the geometric CV of plasma concentrations will be calculated only based on the non-BQL plasma concentrations of the subjects.

**Handling of blood collection time points beyond the time window:**

**•** For blood samples with an actual collection time point beyond the window, the concentrations will be marked with the symbol "*". For example, a plasma concentration value of x.xxx at a time point beyond the window will be displayed as x.xxx* in the data listings

**•** For blood samples with an actual collection time point that did not deviate or that deviated but was not beyond the window, the plasma concentration values will be displayed without any symbol

**•** It will be assessed at the data review meeting as to whether blood samples with an actual collection time point beyond the window should be included statistical analysis or not. Blood collection time points excluded from statistical analysis will be described in the footnotes to the summary table, and subjects with time points beyond the window will be described in the notes.

**•** Unless otherwise specified, all collected blood samples should be included in the calculations of statistics relating to plasma concentration at corresponding scheduled blood collection time points.

Descriptive statistics will be provided for plasma concentration data of the subjects at various scheduled blood collection time points by dose group based on the PKCS, including the number of subjects, number of subjects (BQL), mean, SD, CV, median, minimum, maximum, geometric mean and geometric CV. Concentration data for the dose at Day 1 and the dose at Day 14 will be presented in separate tables.

Based on the summarized data of plasma concentrations at scheduled blood collection time points, the mean plasma concentration-time curves on linear and semi-logarithmic scales will be plotted for different dose groups using the scheduled blood collection time points as the horizontal axis against the geometric mean plasma concentrations at scheduled blood collection time points as the vertical axis. The plasma concentrations at the scheduled blood collection time points will all be displayed as ± SD on the linear and semi-logarithmic curves. The plasma concentration data of different dose groups will be plotted on the same mean concentration-time curve, and the data for the dose at Day 1 and the dose at Day 14 will also be presented on separate curves.

Based on the plasma drug concentration data of the subjects at actual blood collection time points, individual plasma concentration-time curves on linear and semi-logarithmic scales will be plotted for different dose groups using the actual blood collection time as horizontal axis against the plasma drug concentration at each actual blood collection time points as the vertical axis. The plasma concentration-time curves of individual subjects will be plotted by dose group, and the data for the dose at Day 1 and the dose at Day 14 will also be presented on separate curves.

The plasma drug concentration data of subjects in different dose groups at scheduled blood collection time points will be listed. Concentration data for the dose at Day 1 and the dose at Day 14 will be presented in separate listings.

Details of subjects with blood collection time points beyond the window will be listed, presenting the deviation time and deviation percentage.

#### 6.5.4.2. PK Parameter Analysis

PK parameters, including maximum concentration (Cmax), time to maximum concentration (Tmax), half-life (T1/2), area under the plasma concentration-time curve (AUC), apparent clearance (CL/F), apparent volume of distribution (Vz/F) during the terminal phase and accumulation factor (R), will be calculated using the non-compartmental model based on the PKPS.

The following statistics will be calculated for the PK parameters by dose group: the number of subjects, mean, SD, CV, median, minimum, maximum, geometric mean and geometric CV. If a subject's AUC%Extrap > 20%, AUC0-∞, t1/2 and AUC%Extrap will not include descriptive statistics. This will be described in the notes to the summary tables. The data of the parameters for the dose at Day 1 and the dose at Day 14 will be presented in separate tables.

The calculated results of PK parameters will be listed for the subjects by dose group. The data for the dose at Day 1 and the dose at Day 14 will be presented in separate listings.

## 6.6. Pharmacodynamic Evaluation

Statistical analysis will be performed for the following PD endpoints based on the PDAS, presenting the number of subjects, mean, SD, median, quartiles (Q1 and Q3), minimum and maximum. For serum levels of Ig (IgA, IgG and IgM), complement C3, complement C4, anti-ds DNA antibodies and ESR, test data from the local hospital will be used; for total B cells, Beffs, Bregs and cytokines (IFN-α and IL-6), the test data from the central laboratory will be used:

**•** Descriptive statistics will be provided for the quantitative variable - serum levels of immunoglobulins (Ig) [IgA, IgG and IgM] at Day 28 and Day 84 by dose group;

**•** Descriptive statistics will be provided for changes from baseline in the quantitative variables - serum levels of Ig (IgA, IgG and IgM), complement C3 and complement C4 at Day 28 and Day 84 by dose group. Changes from baseline include absolute changes and relative percent changes;

**•** Descriptive statistics will be provided for changes from baseline in serum levels of anti-dsDNA antibodies and ANA on Day 28 and Day 84 by dose group. For quantitative variables, the number of subjects, mean, SD, median, quartile (Q1 and Q3), minimum and maximum will be provided. For qualitative variables, frequency and percentage will be calculated.

**•** Descriptive statistics will be provided for changes from baseline in the quantitative variable - expression level of cytokines (IFN-α and IL-6) at Day 28 and Day 84 by dose group. Changes from baseline include absolute changes and relative percent changes;

**•** Descriptive statistics will be provided for changes from baseline in the quantitative variable - total B cell count at Day 28 and Day 84 by dose group. Changes from baseline include absolute changes and relative percent changes;

**•** Descriptive statistics will be provided for changes from baseline in the quantitative variable - effector B cells (Beffs) at Day 28 and Day 84 by dose group. Changes from baseline include absolute changes and relative percent changes;

**•** Descriptive statistics will be provided for changes from baseline in the quantitative variable - regulatory B cell (Bregs) count at Day 28 and Day 84 by dose group. Changes from baseline include absolute changes and relative percent changes;

**•** Descriptive statistics will be provided for changes from baseline in the quantitative variable - the ratio of Bregs to Beffs (Bregs/Beffs) at Day 28 and Day 84 by dose group. Changes from baseline include absolute changes and relative percent changes.

**•** Descriptive statistics will be provided for changes from baseline in the quantitative variable - ESR at Day 28 and Day 84 by dose group. Changes from baseline include absolute changes and relative percent changes.

Relevant calculation formulas:

Absolute change from baseline = value at a specific visit after treatment visit - baseline value

Percent change from baseline = (value at a specific visit after treatment - baseline value)/baseline value

The test results of all Igs (IgA, IgM and IgM), complement C3, complement C4 and ESR will be listed by subject and visit using the local hospital data.

The test results of total B cell count, Beffs, Bregs and cytokines (IFN-α and IL-6) will be listed for all subjects by subject and visit using the central laboratory data.

## 6.7. Target Occupancy Assessment

### 6.7.1. Collection and Disposition of Samples for Target Occupancy Assay

Approximately 10 mL of blood will be collected at each blood collection point, **but only TBK samples collected from Orelabrutinib-treated subjects will be tested.** Blood samples will be tested at designated laboratories. Refer to "Manual for Collection of BTK Samples" for specific requirements for the collection and treatment of blood samples.

Blood sampling for target occupancy assay will be performed at the following time points:

**•** Within 60 min pre-dose (or within 5 days before the first dose) and at 4 h (± 10 min) post-dose at Day 1;

**•** Within 60 min pre-dose and at 4 h (± 10 min) post-dose at Day 14. The window at Day 14 is ± 1 day.

Target occupancy assay:

Blood samples will be sent to the central laboratory for isolation of PBMCs to measure the target occupancy of Orelabrutinib for BTK in PBMCs. BTK is one of the biomarkers for the pharmacodynamics of Orelabrutinib. If a study site is not capable of performing this assay and cannot send the samples promptly to a facility that is capable of doing such assay, subjects enrolled at this study site may not participate in the target occupancy assay.

### 6.7.2. Target Occupancy Analysis

Based on the PDAS, descriptive statistics will be provided for target occupancy at scheduled visit points by dose group, presenting the number of subjects, mean, SD, median, quartiles (Q1 and Q3), minimum and maximum. Statistics by group exclude the placebo group.

**Scheduled visit points**: within 60 min pre-dose at Day 1 (or within 5 days before the first dose), at 4 h post-dose at Day 1, within 60 min pre-dose at Day 14, and at 4 h post-dose at Day 14.

All results of target occupancy assay will be listed by subject and visit.

# 7. Interim Analysis

No interim analysis has been planned for the study and therefore no interim analysis will be performed.

# 8. Changes Relative to Planned Analyses in the Protocol

The statistical analysis of "painful joint" was deleted from the analyses of changes from baseline in the painful joint count, tender joint count and swollen joint count (the 66/88 joint count) at Day 28 and Day 84 in [Section 6.4](#编号64) of the SAP. Since this variable is not considered an objective variable based on medical judgment and this data was not collected in the CRF, no analysis will be performed on this variable.

The definition of Per-protocol Set (PPS) and the description of secondary endpoint analysis using PPS were added to [Section 5.2](#编号52) of the SAP.

The definition of pharmacokinetic concentration analysis set (PKCS) and the description of PK concentration analysis using the PKCS were added to [Section 5.4](#编号54) of the SAP.

The definition of PK parameter analysis set (PKPS) and the description of PK parameter analysis using the PKPS were added to [Section 5.5](#编号55) of the SAP.

# 9. Statistical Analysis Tables/Listings/Figures (TLFs)

The TLFs templates will be provided as a separate document.
