# Supplementary material for: Orelabrutinib, an irreversible inhibitor of Bruton’s tyrosine kinase, for the treatment of systemic lupus erythematosus: a randomised, double-blind, placebo-controlled, phase Ib/IIa study
Source: Research Square preprint supplement (doi:10.21203/rs.3.rs-7058001/v1), 2025-07-23
Supplement: Supplementary file 3 [file bf9e261be36ec79e95b3bae1.docx]

**Supplementary Materials**

These supplementary materials formed part of the original submission and has been peer reviewed. We post it as supplied by the authors.

Supplement to: Ru Li, Xue Li, Xiaoxia Zhu, et al. Orelabrutinib, an irreversible inhibitor of Bruton’s tyrosine kinase, for the treatment of systemic lupus erythematosus: a randomized, double-blind, placebo-controlled, phase Ib/IIa study.

**Table of Contents**

[Investigator List 3](#_Toc151980598)

[Inclusion Criteria 4](#_Toc151980599)

[Exclusion Criteria 5](#_Toc151980600)

[Figure S1: Study design 7](#_Toc151980601)

[Table S1: Protocol deviations 8](#_Toc151980602)

[Table S2: Total SLEDAI-2K score and relative baseline change at each visit, FAS (N=60) 9](#_Toc151980603)

[Table S3: Treatment-Related Adverse Events, Safety Set (N=60) 10](#_Toc151980604)

Table S4. Serious Treatment-Related Adverse Events, Safety Set (N=60)

[Table S5: 12](#_Toc151980606)

# Investigator List

**China**

Zhanguo Li, Peking University People’s Hospital

Xiaoxia Zhu, Huashan Hospital Fudan University

Shengyun Liu, The First Affiliated Hospital of Zhengzhou University

Xiao Zhang, Guangdong Provincial People’s Hospital

Changhao Xie, The First Affiliated Hospital of Bengbu Medical College

Zili Fu, First Hospital of Shanxi Medical University

Anbin Huang, Union Hospital Tongji Medical College Huazhong University of Science and Technology

Lingyun Sun, Nanjing Drum Tower Hospital

Dongzhou Liu, Shenzhen People’s Hospital

Jinxia Zhao, Peking University Third Hospital

Lin Wu, The University of Hong Kong Shenzhen Hospital

# Inclusion Criteria

Subjects eligible for the study must meet all of the following criteria:

1. Able to provide written informed consent.
2. Male or female subjects aged 18-75 years.
3. Diagnosis of SLE at >6 months before signing the informed consent, meeting at least 4 out of 11 criteria of American College of Rheumatology (ACR) classification criteria for SLE.
4. The total score of SLEDAI-2K at screening is 5-12 (including cut-off value).
5. Currently under standard treatment for SLE and has been treated for at least 3 months. The standard treatment for SLE can be corticosteroids, and/or antimalarials (such as chloroquine or hydroxychloroquine), and/or immunosuppressants (such as azathioprine, methotrexate, mycophenolate mofetil, or sodium mycophenolate, cyclosporine, leflunomide, tacrolimus, sirolimus, mizoribine, 6-mercaptopurine, iguratimod or thalidomide).
6. Anti-dsDNA antibody positive and/or ANA positive and/or anti-Smith antibody positive, all based on the normal reference ranges provided by the local hospital.

# Exclusion Criteria

Subjects who meet any of the following criteria will be excluded from this study:

1. Not able to abide by the protocol requirements.
2. Females who are pregnant or breastfeeding or intend to become pregnant during the study or male partners.

- Pregnancy test is not required for women of non-childbearing potential who have been postmenopausal (at least 12 months of non-therapy-induced amenorrhea) or surgically sterilized (absence of ovaries and/or uterus).

1. Prior exposure to a BTK inhibitor.
2. Suffering from Neuropsychiatric Systemic Lupus Erythematosus (NPSLE), manifested as mental confusion, organic encephalopathy syndrome, cranial nerve disease, lupus headache, or new cerebrovascular accident, etc.).
3. Severe or rapidly progressive type III or IV glomerulitis, simple type V or VI lupus nephritis, or active nephritis that requires the use of drugs prohibited by the protocol, or active nephritis that requires hemodialysis treatment.
4. Suffering from other autoimmune diseases except SLE (excluding secondary Sjogren’s syndrome).
5. Subjects who intend to start or change anti-SLE treatment after the screening visit.
6. Prior corticosteroids given in excess of prednisone 25 mg/day or its equivalent or previously changed the corticosteroid dose, within the 28 days before randomization.
7. Have started any angiotensin-converting enzyme inhibitor or angiotensin receptor blocker, or nonsteroidal anti-inflammatory drug (NSAID) or changed their doses, within 1 week before screening or during screening.
8. Have started the following antimalarials or immunosuppressants within 3 months before randomization, or changed their doses within 28 days before randomization:

- Antimalarial drugs, including chloroquine or hydroxychloroquine;
- Immunosuppressants, including methotrexate, azathioprine, mycophenolate mofetil or sodium mycophenolate, cyclosporine, tacrolimus, sirolimus, leflunomide, mizoribine, 6-mercaptopurine, iguratimod or thalidomide.

1. Have used rituximab, epratuzumab, or any other B-cell depletion treatment within 12 months before randomization.
2. Have used cyclophosphamide and chlorambucil within 6 months before randomization.
3. Have received belimumab, tumor necrosis factor (TNF) blockers, interleukin receptor blockers or other biological agents, intravenous immunoglobulin, or plasma exchange therapy, within 3 months before randomization (or 5 half-lives, whichever is longer).
4. Have participated in any other clinical trial or have used any investigational drug or other immunosuppressants/modulators (unless approved by the medical monitor) within 28 days before the screening period (or 5 half-lives, whichever is longer).
5. Have received cyclosporine A topical cream/ointment preparations (except ophthalmic drugs), strong topical glucocorticoids (as per World Health Organization coding dictionary) or other local immunomodulators (such as tacrolimus, pimecrolimus) withing 28 days before randomization.
6. Vaccination with live or live-attenuated virus vaccine within 1 month before screening or during screening.

- Patients who have been vaccinated against Streptococcus pneumoniae vaccine (23-valent pneumococcal polysaccharide vaccine or 13-valent pneumococcal conjugate vaccine) as per local guidelines are allowed;
- For subjects who have received one or more influenza vaccines during screening, an interval of at least 2 weeks from the date of vaccination to the first administration of the study drug is required.

1. Active and uncontrolled infection (clinically significant viral, bacterial or fungal infection, etc.), or any severe infection that requires hospitalization in the past 6 months; or have received anti-infective treatment recently (within 14 days before the first dose).
2. Herpes zoster infection within 12 weeks prior to screening, or a history of disseminated/complex herpes zoster (eg: multiple skin involvement, ocular herpes zoster, central nervous system involvement, or postherpetic neuralgia).
3. Positive tuberculosis screening during the screening period (as per the interferon-γ release assay for the diagnosis of tuberculosis, including T-SPOT®, etc.), or patients with active or latent tuberculosis, or tuberculosis patients who have not completed the appropriate standard treatment.
4. The interval between the last dose of the CYP3A4 inhibitor and the first dose of investigational drug is less than 5 half-lives of CYP3A4 inhibitor.
5. Known human immunodeficiency virus (Human Immunodeficiency Virus, HIV) infection, as evidenced by positive serological test.
6. Current or history of Central Nervous System (CNS) diseases, such as epilepsy, CNS vasculitis or neurodegenerative diseases, patients with a history of stroke who have had a stroke or transient ischemic attack within 2 years before screening, or have residual neurological defects as judged by the investigator.
7. Major and uncontrolled concomitant diseases (including poorly controlled diabetes and related medical history) that may affect compliance with the protocol or the interpretation of study results.
8. Major surgery or major traumatic injury (excluding biopsy) within 28 days before the first administration, or major surgery is expected during the study treatment period.
9. Clinically documented cardiovascular diseases that are obviously unstable or not effectively treated, such as heart disease class III or IV according to the New York Heart Association (NYHA) classification (see Appendix 3 for details), or have had myocardial infarction, malignant arrhythmia, unstable angina pectoris in the past 6 months, or hypertension that cannot be controlled by medication.
10. Significant active lung disease (such as interstitial lung disease and/or obstructive lung disease, etc.).
11. Any other disease, metabolic dysfunction, physical examination findings, or clinical laboratory findings that may be contraindicated to use the study drug.
12. HBV [Hepatitis B Surface Antigen (HBsAg)] or HCV antibody positive, or the HBV DNA positive by Polymerase Chain Reaction (PCR) test for patients with Hepatitis B Core Antibody (HbcAb) positive.
13. Abnormal tissue or organ functions, as evidenced by the following laboratory tests before randomization:

- Absolute neutrophil count (ANC) < 1.5 x 109/L; platelet < 75 x 109/L; hemoglobin<90 g/L; lymphocyte count<0.8 x 109/L;
- Total bilirubin>1.5 x Upper Limit of Normal (ULN) (for subjects with history of Gilbert syndrome, >3 x ULN); aspartate aminotransferase (AST) or alanine aminotransferase (ALT)>2 x ULN;
- Estimated glomerular filtration rate < 40 ml/min/1.73m2 from the Modification of Diet in Renal Disease (MDRD) formula;
- Protein urine in 24 hours ≥3.5 g.

# Figure S1: Study design

This study is designed as a randomized, double-blind, placebo-controlled trial. It includes a screening period (no more than 28 days after the subject signs the informed consent to the first dose), a treatment period (12 consecutive weeks after the first dose), and a follow-up period (28 days after the last dose). The schematic diagram of the overall design of the study is as follows:

**Treatment period**

**Once daily PO for 12 weeks**

Randomization at D1

**Placebo (n=15)**

**Screening period**

**Day -28 to -1**

**Follow-up**

**28days after last dose**

**ICP-022 50mg (n=15)**

**ICP-022 80mg (n=15)**

**ICP-022 100mg (n=15)**

The subjects to be included in this study should be patients undergoing standard treatment. These patients will be randomized into the placebo group (n=15) and the orelabrutinib group (n=45), of which the orelabrutinib group will be divided into three cohorts: 50 mg (n=15), 80 mg (n=15) and 100 mg (n=15). The study drug will be taken orally once a day for 12 weeks.

# Table S1: Protocol deviations

|  | **Placebo (N=14)** | **Orelabrutinib 50 mg (N=15)** | **Orelabrutinib 80 mg (N=15)** | **Orelabrutinib 100 mg (N=16)** | **Total (N=60)** |
| --- | --- | --- | --- | --- | --- |
| **Total** | 14 (100%) | 14 (93.3%) | 15 (100%) | 14 (87.5%) | 57 (95.0%) |
| **Major** | 0 | 0 | 0 | 0 | 0 |
| **Mild** | 14 (100%) | 14 (93.3%) | 15 (100%) | 14 (87.5%) | 57 (95.0%) |
| Study test | 13 (92.9%) | 9 (60.0%) | 13 (86.7%) | 12 (75.0%) | 47 (78.3%) |
| Study drug | 9 (64.3%) | 6 (40.0%) | 5 (33.3%) | 9 (56.3%) | 29 (48.3%) |
| Study procedure | 5 (35.7%) | 9 (60.0%) | 8 (53.3%) | 7 (43.8%) | 29 (48.3%) |
| Study drug management | 1 (7.1%) | 0 | 4 (26.7%) | 2 (12.5%) | 7 (11.7%) |
| Visit | 0 | 0 | 3 (20.0%) | 2 (12.5%) | 5 (8.3%) |
| Other | 1 (7.1%) | 1 (6.7%) | 1 (6.7%) | 1 (6.3%) | 4 (6.7%) |
| Prohibited Therapies | 0 | 0 | 1 (6.7%) | 0 | 1 (1.7%) |
| Daily management | 0 | 0 | 0 | 1 (6.3%) | 1 (1.7%) |

# Table S2: Treatment-Related Adverse Events, Safety Set (N=60)

|  | **Placebo (N=14)** | **Orelabrutinib 50 mg (N=15)** | **Orelabrutinib 80 mg (N=15)** | **Orelabrutinib 100 mg (N=16)** | **Total (N=60)** |
| --- | --- | --- | --- | --- | --- |
| Treatment-related adverse event | 7 (50.0) | 10 (66.7) | 13 (86.7) | 13 (81.3) | 43 (71.7) |
| Decreased lymphocyte count | 1 (7.1) | 2 (13.3) | 5 (33.3) | 5 (31.3) | 13 (21.7) |
| Decreased white blood cell count | 2 (14.3) | 0 | 3 (20.0) | 3 (18.8) | 8 (13.3) |
| Elevated thyroid stimulating hormone | 2 (14.3) | 1 (6.7) | 0 | 3 (18.8) | 6 (10.0) |
| Decreased platelet count | 1 (7.1) | 0 | 1 (6.7) | 2 (12.5) | 4 (6.7) |
| White blood cell count increased | 0 | 1 (6.7) | 1 (6.7) | 0 | 2 (3.3) |
| Blood fibrinogen decreased | 0 | 1 (6.7) | 0 | 1 (6.3) | 2 (3.3) |
| Neutrophil count decreased | 1 (7.1) | 0 | 1 (6.7) | 0 | 2 (3.3) |
| Gamma-glutamyltransferase increased | 1 (7.1) | 0 | 0 | 0 | 1 (1.7) |
| Alanine aminotransferase increased | 0 | 0 | 1 (6.7) | 0 | 1 (1.7) |
| Amylase increased | 0 | 0 | 1 (6.7) | 0 | 1 (1.7) |
| Red blood cell count decreased | 0 | 0 | 1 (6.7) | 0 | 1 (1.7) |
| Thyroid function test abnormal | 0 | 0 | 0 | 1 (6.3) | 1 (1.7) |
| Aspartate aminotransferase increased | 0 | 0 | 1 (6.7) | 0 | 1 (1.7) |
| Haemoglobin decreased | 0 | 0 | 1 (6.7) | 0 | 1 (1.7) |
| Neutrophil count increased | 0 | 0 | 1 (6.7) | 0 | 1 (1.7) |
| Upper respiratory tract infection | 1 (7.1) | 1 (6.7) | 0 | 4 (25.0) | 6 (10.0) |
| Urinary tract infection | 0 | 1 (6.7) | 1 (6.7) | 1 (6.3) | 3 (5.0) |
| Herpes zoster | 0 | 0 | 1 (6.7) | 1 (6.3) | 2 (3.3) |
| Pneumonia | 0 | 0 | 1 (6.7) | 0 | 1 (1.7) |
| Tinea versicolour | 0 | 1 (6.7) | 0 | 0 | 1 (1.7) |
| Oral herpes | 0 | 0 | 0 | 1 (6.3) | 1 (1.7) |
| Asymptomatic bacteriuria | 0 | 0 | 0 | 1 (6.3) | 1 (1.7) |
| Periodontitis | 0 | 0 | 0 | 1 (6.3) | 1 (1.7) |
| Ophthalmic herpes zoster | 0 | 0 | 0 | 1 (6.3) | 1 (1.7) |
| Vaginal infection | 0 | 0 | 1 (6.7) | 0 | 1 (1.7) |
| Myometritis | 0 | 0 | 0 | 1 (6.3) | 1 (1.7) |
| Petechia | 0 | 1 (6.7) | 2 (13.3) | 4 (25.0) | 7 (11.7) |
| Purpura | 0 | 0 | 1 (6.7) | 1 (6.3) | 2 (3.3) |
| Henoch-Schonlein purpura | 0 | 0 | 0 | 1 (6.3) | 1 (1.7) |
| Rash | 0 | 1 (6.7) | 0 | 0 | 1 (1.7) |
| Eczema | 0 | 0 | 0 | 1 (6.3) | 1 (1.7) |
| Hypokalaemia | 1 (7.1) | 2 (13.3) | 1 (6.7) | 0 | 4 (6.7) |
| Hypocalcaemia | 1 (7.1) | 0 | 0 | 0 | 1 (1.7) |
| Abnormal liver function | 0 | 1 (6.7) | 2 (13.3) | 1 (6.3) | 4 (6.7) |
| Liver injury | 0 | 0 | 1 (6.7) | 0 | 1 (1.7) |
| Anaemia | 0 | 0 | 3 (20.0) | 2 (12.5) | 5 (8.3) |
| Epistaxis | 0 | 0 | 0 | 1 (6.3) | 1 (1.7) |
| Pneumonitis | 0 | 0 | 0 | 1 (6.3) | 1 (1.7) |
| Oropharyngeal pain | 0 | 0 | 1 (6.7) | 0 | 1 (1.7) |
| Bronchiectasis | 0 | 0 | 1 (6.7) | 0 | 1 (1.7) |
| Thyroid mass | 0 | 1 (6.7) | 1 (6.7) | 1 (6.3) | 3 (5.0) |
| Enteritis | 0 | 0 | 0 | 1 (6.3) | 1 (1.7) |
| Abdominal pain | 0 | 0 | 0 | 1 (6.3) | 1 (1.7) |
| Diarrhoea | 0 | 1 (6.7) | 0 | 0 | 1 (1.7) |
| Dyspepsia | 0 | 0 | 0 | 1 (6.3) | 1 (1.7) |
| Pelvic fluid collection | 0 | 0 | 1 (6.7) | 1 (6.3) | 2 (3.3) |
| Cervical cyst | 0 | 0 | 1 (6.7) | 0 | 1 (1.7) |
| Ovarian cyst | 0 | 0 | 1 (6.7) | 0 | 1 (1.7) |
| Abnormal uterine bleeding | 0 | 0 | 0 | 1 (6.3) | 1 (1.7) |
| Chondrodermatitis helicis | 0 | 1 (6.7) | 0 | 0 | 1 (1.7) |
| Dizziness | 1 (7.1) | 0 | 0 | 0 | 1 (1.7) |
| Foreign body in eye | 0 | 1 (6.7) | 0 | 0 | 1 (1.7) |
| Arthralgia | 0 | 0 | 1 (6.7) | 0 | 1 (1.7) |
| Pyrexia | 0 | 0 | 0 | 1 (6.3) | 1 (1.7) |
| Haematuria | 0 | 0 | 1 (6.7) | 0 | 1 (1.7) |

Note: Treatment-emergent adverse events were defined as those that occurred between the first dose and the safety follow-up period, which was 28 days after the last dose.
